# Supplementary material for: Machine learning based feature engineering for thermoelectric materials by design
Source: Royal Society of Chemistry journal article supplement (doi:10.1039/d3dd00131h), 2024-01-01
Supplement: d3dd00131h1.pdf [file d3dd00131h1.pdf]

## Supplementary Information

### 1. Overview of paper

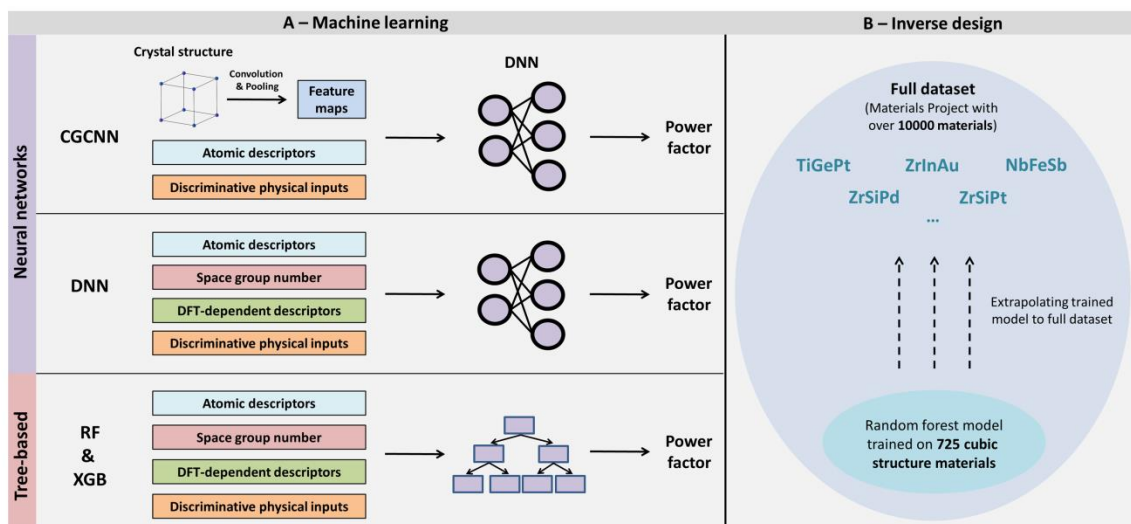

Figure S1. (A) 4 machine learning models: Crystal Graph Convolutional Neural Network (CGCNN), Deep Neural Network (DNN), Random Forest (RF) and XG Boost (XGB) were trained independently for predicting power factor of thermoelectric materials. These models differ in terms of their architecture and inputs as shown. (B) Random forest model, being the most accurate among the 4, was used to discover numerous new materials with good thermoelectric property (e.g. TiGePt, ZrInAu, NbFeSb, ZrSiPd and ZrSiPt) outside the training set.

### 2. Methodology

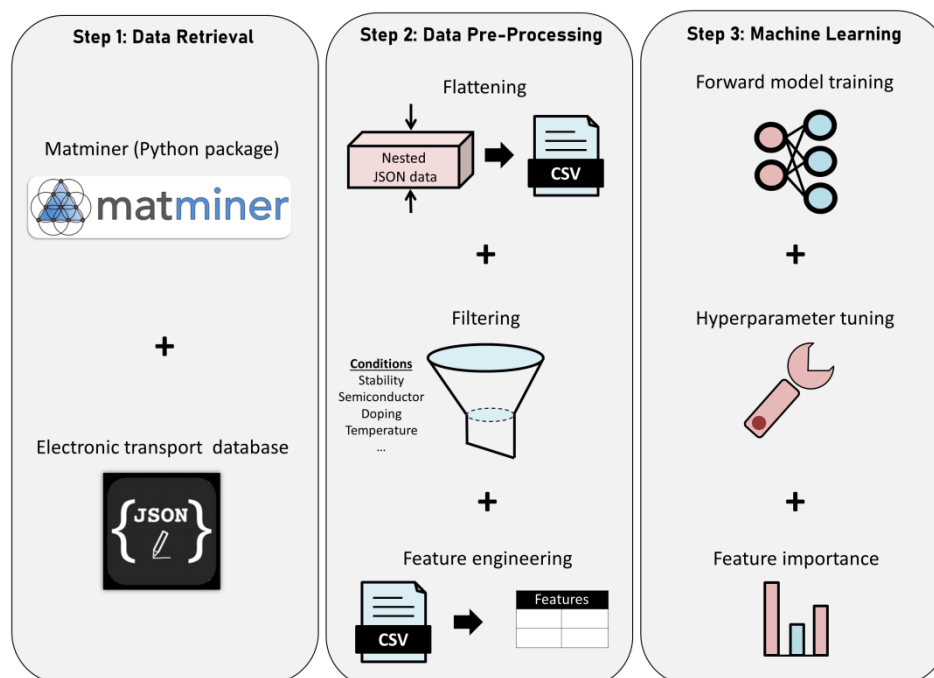

Figure S2: The 3 phases involved in the forward model training are retrieving data from open-source material databases, processing the retrieved data to obtain the necessary features and developing optimized forward machine learning models based on these features

### 3. Box cox transformation

The following diagram illustrates the impact of box-cox transformation on the prediction accuracy of a machine learning model.

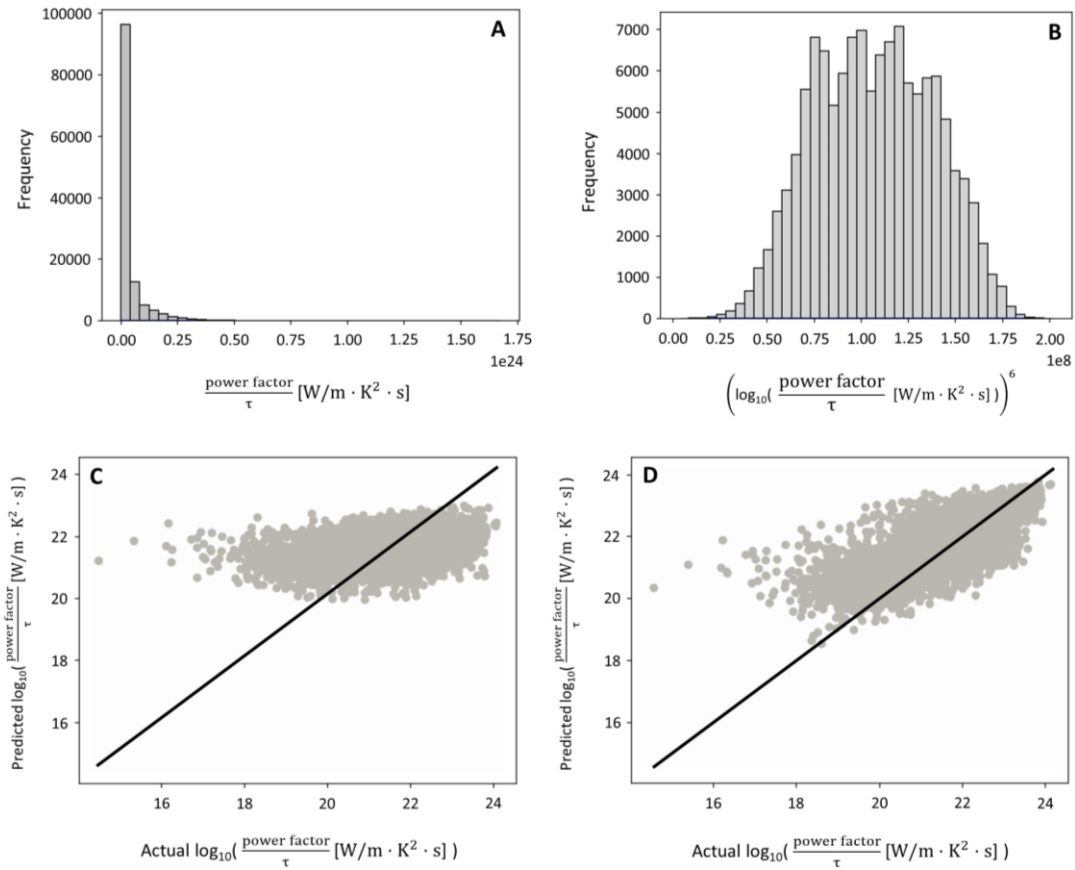

Figure S3: Box-cox transformation. **(A)** Distribution of power factor (before transformation). **(B)** Distribution of power factor (after transformation). **(C)** Plot of prediction against actual  $\log_{10}\left(\frac{\text{power factor}}{\tau}\right)$  [W/m · K<sup>2</sup> · s] values (before transformation). **(D)** Plot of prediction against actual  $\log_{10}\left(\frac{\text{power factor}}{\tau}\right)$  [W/m · K<sup>2</sup> · s] values (after transformation)

As seen in Figure S3, the variance of the data is increased when box-cox transformation is applied. This is essential for the neural networks to learn the intricacies of the data; otherwise, the predictions by the neural networks will also have high bias and low variance.

## 4. Statistics of the reduced training set

Supplementary Table 1: Statistics of reduced training set

| <b>Parameter</b>                                        | <b>Value</b>                                                                |
|---------------------------------------------------------|-----------------------------------------------------------------------------|
| Number of unique materials                              | 8059                                                                        |
| Range of Atomic Weight                                  | 0 to 207.97                                                                 |
| Mean Atomic Weight                                      | 1.01 to 176.24                                                              |
| Standard deviation of Atomic Weight                     | 0 to 95.6                                                                   |
| Range of Covalent Radius                                | 0 to 213                                                                    |
| Mean Covalent Radius                                    | 31.0 to 217.75                                                              |
| Standard deviation of Covalent Radius                   | 0 to 94.5                                                                   |
| Range of Electronegativity                              | 0 to 3.19                                                                   |
| Mean Electronegativity                                  | 1.11 to 3.82                                                                |
| Standard deviation of Electronegativity                 | 0 to 1.60                                                                   |
| Number of elements                                      | 1 to 7                                                                      |
| Molecular weight                                        | 2.02 to 7253.08                                                             |
| n/p type (One-hot encoded)                              | 1 or 0                                                                      |
| Temperature                                             | 100 to 1300                                                                 |
| Doping                                                  | 1e18 to 1e20                                                                |
| Crystal structure                                       | Cubic, Hexagonal, Monoclinic, Orthorhombic, Tetragonal, Triclinic, Trigonal |
| Number of sites in the unit cell ( $n_{\text{sites}}$ ) | 2 to 192                                                                    |
| s fraction                                              | 0.0164 to 0.927                                                             |
| d fraction                                              | 0.068 to 0.940                                                              |
| p fraction                                              | 0 to 0.868                                                                  |
| Formation energy per atom                               | -4.49 to 0.0448                                                             |
| Energy above hull                                       | 0 to 0.0498                                                                 |
| Final energy per atom                                   | -10.70 to -1.12                                                             |
| Volume                                                  | 13.98 to 5047.21                                                            |
| Density                                                 | 0.0400 to 13.16                                                             |
| Band gap                                                | 0.161 to 9.06                                                               |
| Fermi energy                                            | -8.37 to 10.93                                                              |
| Direct/indirect (One-hot encoded)                       | 1 or 0                                                                      |

## 5. Machine Learning models

### 5.1 Crystal graph convolutional neural network (CGCNN)

The CGCNN model was developed in PyTorch. The following custom loss function was used to compute the loss.

$$\text{Loss} = 10 \frac{1}{n} \sum (\text{prediction} - \text{actual})^2 = 10 \text{mean squared error} \quad (\text{S1})$$

This loss function was used in place of standard mean squared error as this amplifies the error value which was back-propagated during training. In this way, the CGCNN model was better able to learn from the data.

Since the training of CGCNN model involves assembling atomic features from the crystal structure of a material using Pymatgen package for each training datapoint, the time needed for training the forward model significantly increased. Hence, randomized search of hyper parameters was used for finding the best hyper parameters of CGCNN model.

Feature importance was employed in a similar fashion like hyperparameter tuning such that random combinations of atomic descriptors were experimented. Finally, the smallest combination of atomic descriptors which gives the highest accuracy on test set was determined to be most important features.

### 5.2 Deep neural network (DNN)

Deep neural network (DNN) was implemented in Python using a deep learning library called Keras was used which is a high level neural networks API capable of running on top of Tensorflow and Theano. The loss function used for DNN was standard mean squared error. This standard loss function was sufficient for DNN to be trained effectively. Hyperparameter tuning of DNN was done by an optimizer called GridSearchCV. Since the training of DNN was significantly faster than CGCNN, grid search was implemented in place of random search. An open-source Python-based library called eli5 was used to perform permutation feature importance on DNN model. eli5 permutation importance does not require training the model again for every new combination of features. Instead, it makes use of the trained model to predict the output value using only a subset of features from the test set. In this way, it quantifies the importance of that subset of features.

### 5.3 XG Boost (XGB)

A Python library called ‘xgboost’ was used to train the XG boost (XGB) model. The procedure for hyperparameter tuning is same as that for DNN. There is no additional package needed for computing the feature importance of XGB model as feature importance will automatically be computed during model training based on the information of the splits in the decision trees. Total gain was used as the metric for quantifying the importance of the features. There are other metrics such as average gain, cover and total cover available for quantifying the importance of features in a XGB model. However, total gain being the most useful metric was used in this project.

### 5.4 Random Forest (RF)

Training of random forest (RF) model was done by a class called ‘RandomForestRegressor’ available in Scikit-learn machine learning library. Apart from that, forward model training, hyperparameter tuning as well as feature importance was carried out in a similar fashion as XGB.

## 6. Hyperparameters

Supplementary Table 2: Hyperparameters for CGCNN

| <b>Hyperparameter</b>              | <b>Range</b>        | <b>Best</b> |
|------------------------------------|---------------------|-------------|
| No. of conv layers                 | 1-5                 | 3           |
| No. of neurons (conv layer)        | {50,100,150}        | 50          |
| No. of fully connected (FC) layers | 1-5                 | 2           |
| No. of neurons (FC layer)          | {50,100,150}        | 100         |
| Learning rate                      | {0.1,0.001, 0.0001} | 0.0001      |
| Batch size                         | {128, 256}          | 128         |
| Optimizer                          | Adam, SGD           | Adam        |

Supplementary Table 3: Hyperparameters for DNN

| <b>Hyperparameter</b>   | <b>Range</b>           | <b>Best</b> |
|-------------------------|------------------------|-------------|
| Number of hidden layers | 1-5                    | 3           |
| Number of neurons       | 20-100                 | 100         |
| Activation function     | Relu, sigmoid, tanh    | Relu        |
| Drop out rate           | 0-0.8                  | 0           |
| Batch size              | {16, 32, 64, 128, 256} | 16          |
| Optimizer               | SGD, RMSprop, Adam     | Adam        |

Supplementary Table 4: Hyperparameters for XG Boost

| Hyper parameter  | Range      | Best |
|------------------|------------|------|
| n_estimators     | 1 - 500    | 319  |
| max_depth        | 1 - 10     | 10   |
| min_child_weight | 1 - 10     | 10   |
| Learning rate    | 0.01 - 0.2 | 0.2  |
| gamma            | 0 - 1      | 1    |
| alpha            | 1e-10 - 1  | 0.75 |
| lambda           | 0.1 - 10   | 10   |
| scale_pos_weight | 0.1 - 10   | 3.4  |
| subsample        | 0 - 1      | 1    |

Supplementary Table 5: Hyperparameters for random forest

| Hyperparameter    | Range         | Best  |
|-------------------|---------------|-------|
| n_estimators      | 1-500         | 391   |
| max_features      | auto or sqrt  | sqrt  |
| max_depth         | 10-110        | 100   |
| min_samples_split | {2,5,10}      | 2     |
| min_samples_leaf  | {1,2,4}       | 1     |
| bootstrap         | True or False | False |

## 7. Variation of error

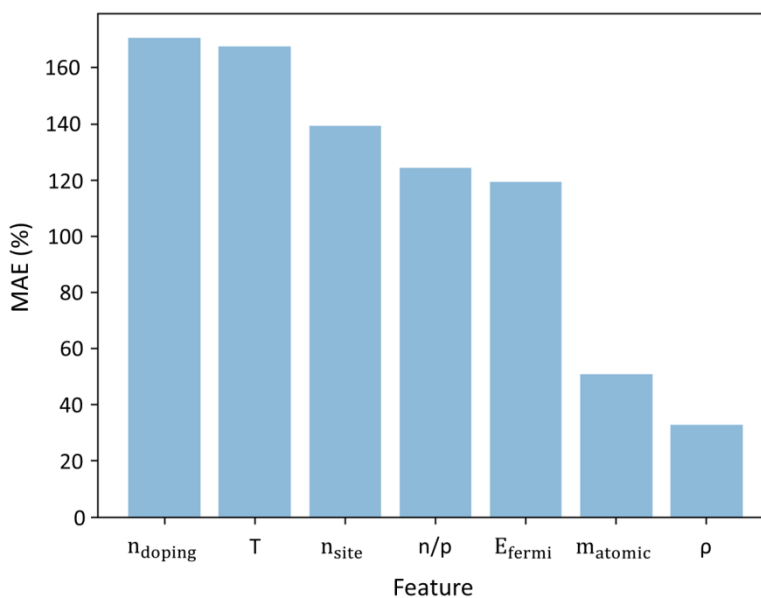

Figure S4. Variation of error for random forest model trained with only 7 features (all crystal structures)

## 8. Random Forest model (no filters on power factor)

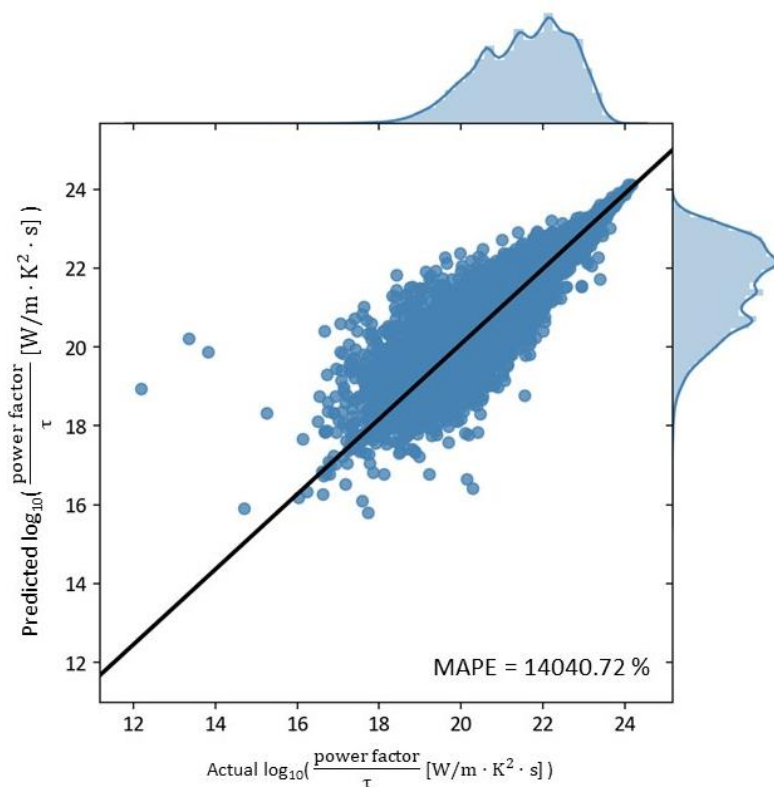

Figure S5. Test results of random forest model trained on all crystal structures (no filters on power factor)

## 9. Prediction of fermi energy

The following diagram shows the performance of the pre-trained CGCNN model in predicting fermi energy.

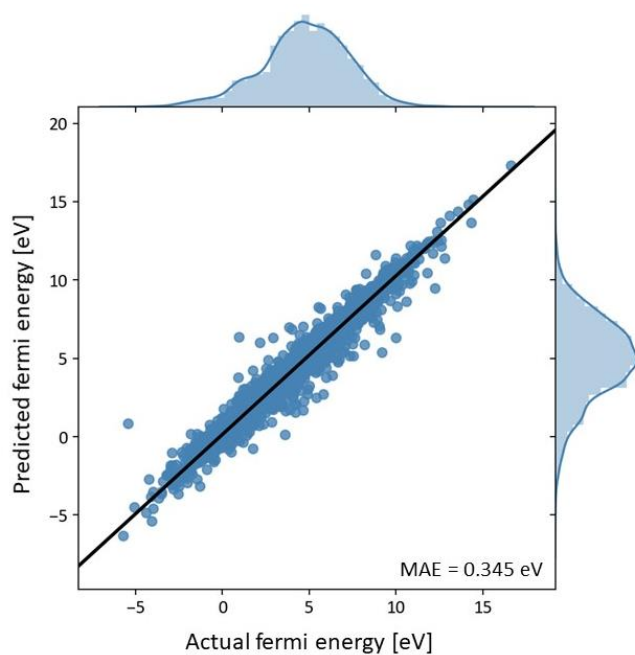

Figure S6. Plot of prediction against actual fermi energy (eV).

As shown in Figure S6, the MAE of the Fermi energy prediction model is 0.345 eV, which is consistent with the performance of the original CGCNN model [Phys. Rev. Lett. 120, 145301, MAE ( $E_{\text{fermi}}$ ) = 0.363 eV]. This value informs our choice of  $E_{\text{fermi}}$ , as displayed in Figure 4 of the main manuscript.

## 10. Random Forest model (cubic structure with all features)

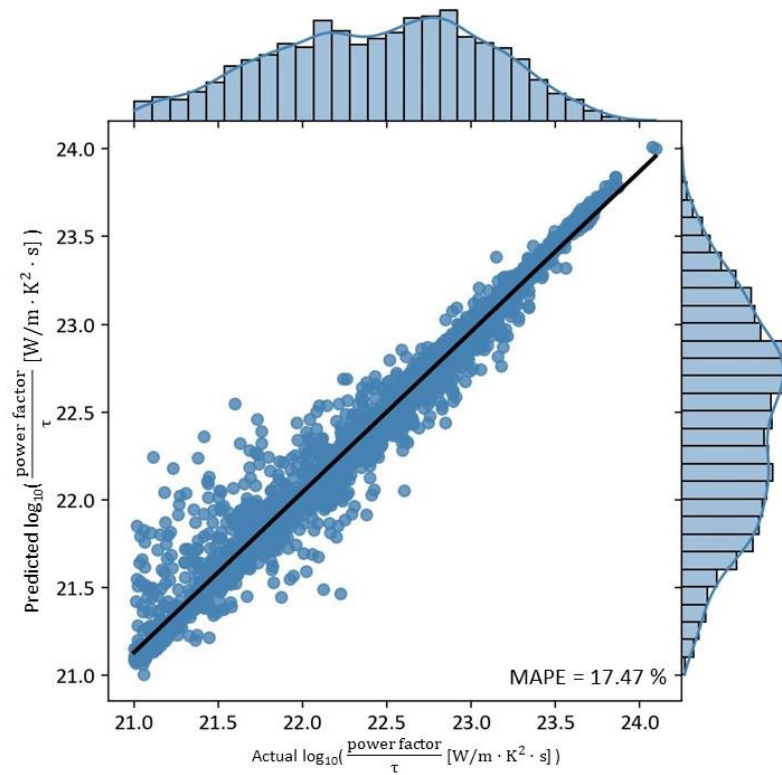

Figure S7. Test results of random forest model trained on cubic structure materials (all features).



## 11. Random Forest model (different Seebeck coefficient values)

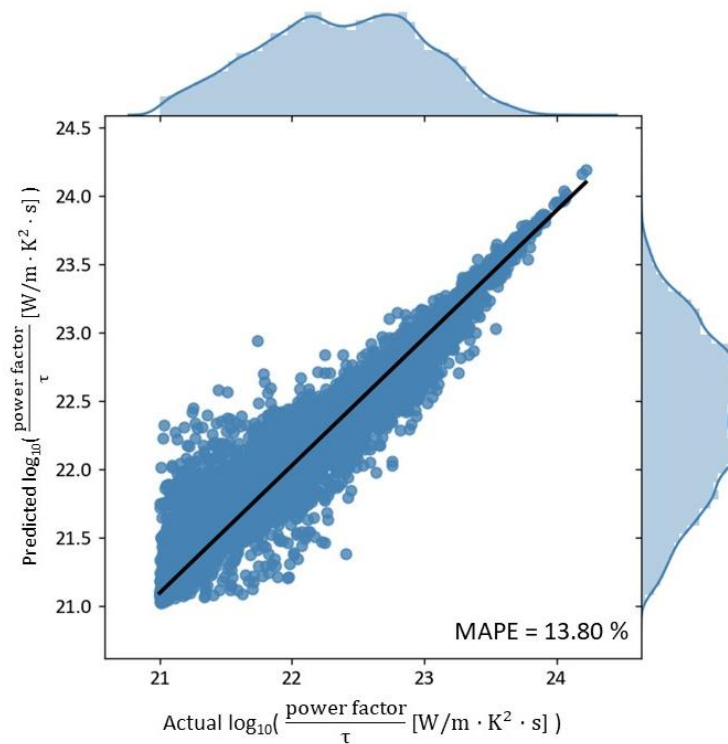

Figure S8. Test results of random forest model trained on all structure materials (different Seebeck coefficient values)

## 12. Inverse design predictions

The target power factor values were benchmarked using the theoretical power factor values of NbFeSb computed using BoltzTrap BTE package at different physical conditions. The predictions for the different crystal structures can be found in the excel file attached.

Supplementary Table 6: Nomenclature of the letters representing physical conditions

| Category | Temperature (K) | Doping concentration (cm <sup>-3</sup> ) | n/p type | Target power factor (mW/m · K <sup>2</sup> ) |
|----------|-----------------|------------------------------------------|----------|----------------------------------------------|
| A        | 300             | 1e20                                     | n-type   | 0.714                                        |
| B        | 300             | 1e19                                     | n-type   | 0.543                                        |
| C        | 300             | 1e18                                     | n-type   | 0.17                                         |
| D        | 500             | 1e20                                     | n-type   | 1.57                                         |
| E        | 500             | 1e19                                     | n-type   | 0.809                                        |
| F        | 500             | 1e18                                     | n-type   | 0.197                                        |
| G        | 300             | 1e20                                     | p-type   | 2.24                                         |
| H        | 300             | 1e19                                     | p-type   | 0.64                                         |
| I        | 300             | 1e18                                     | p-type   | 0.128                                        |
| J        | 500             | 1e20                                     | p-type   | 3.29                                         |
| K        | 500             | 1e19                                     | p-type   | 0.789                                        |
| L        | 500             | 1e18                                     | p-type   | 0.084                                        |

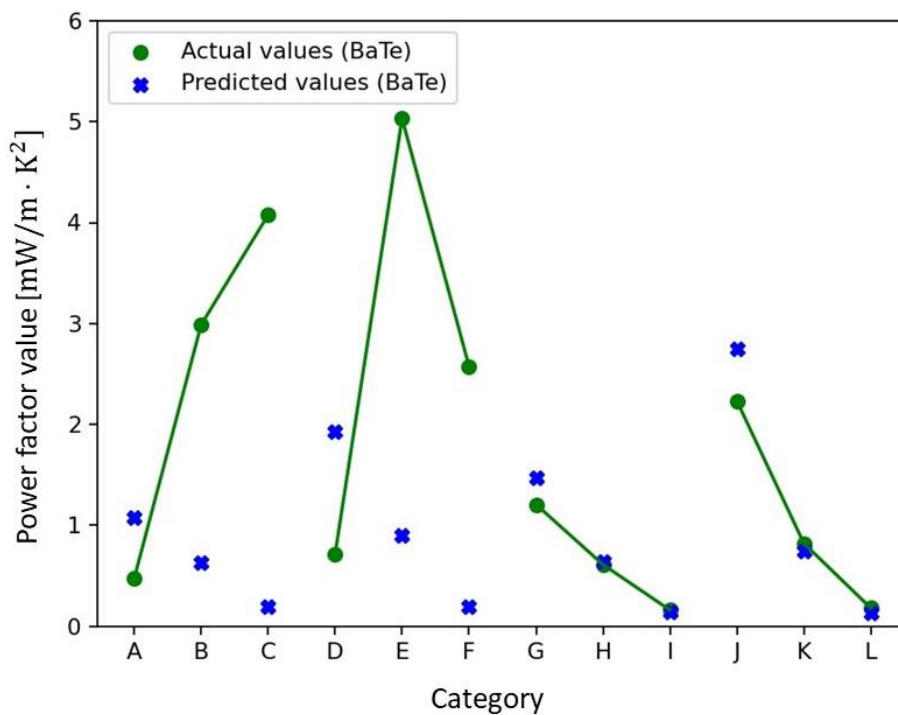

Figure S9: Plot of actual & predicted power factor values (BaTe)

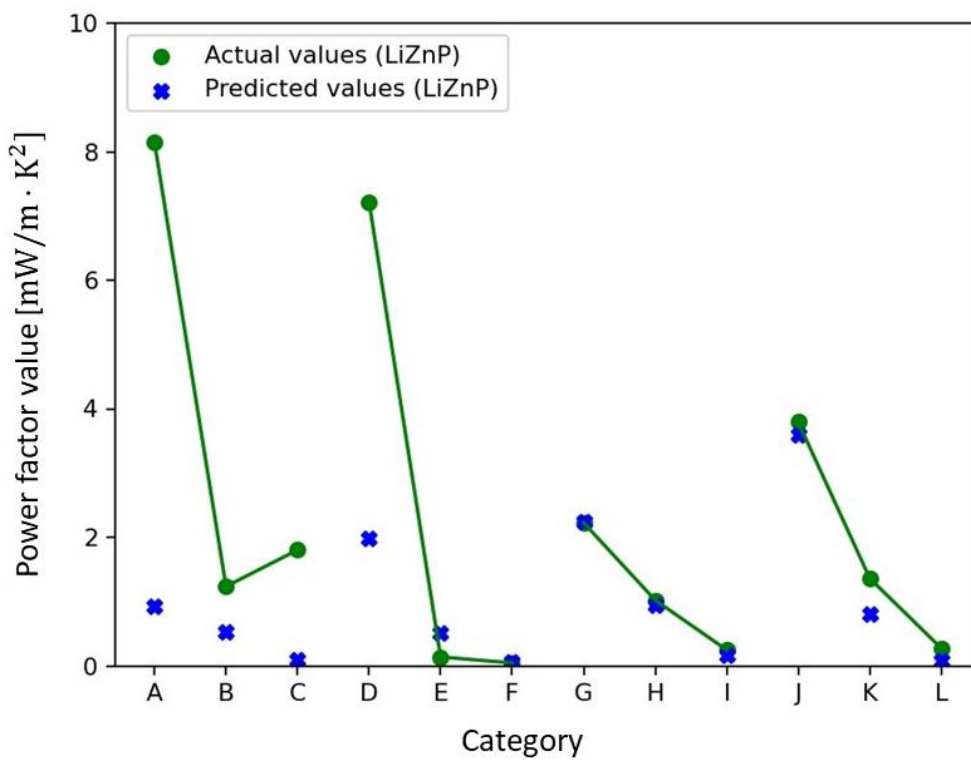

Figure S10: Plot of actual & predicted power factor values (LiZnP)

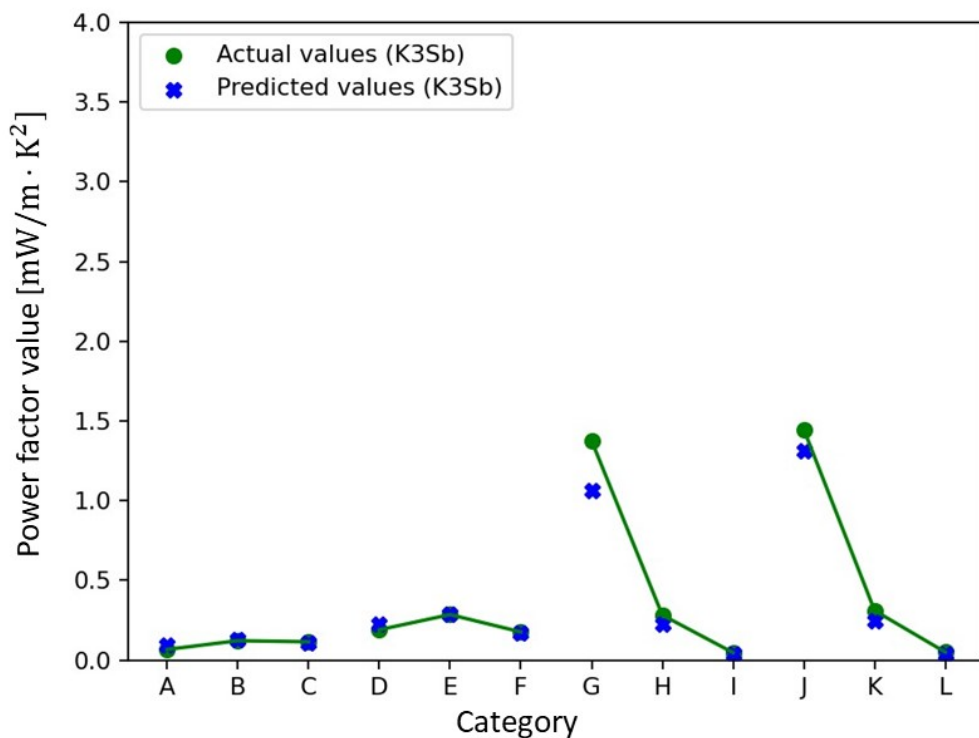

Figure S11: Plot of actual & predicted power factor values (K<sub>3</sub>Sb)

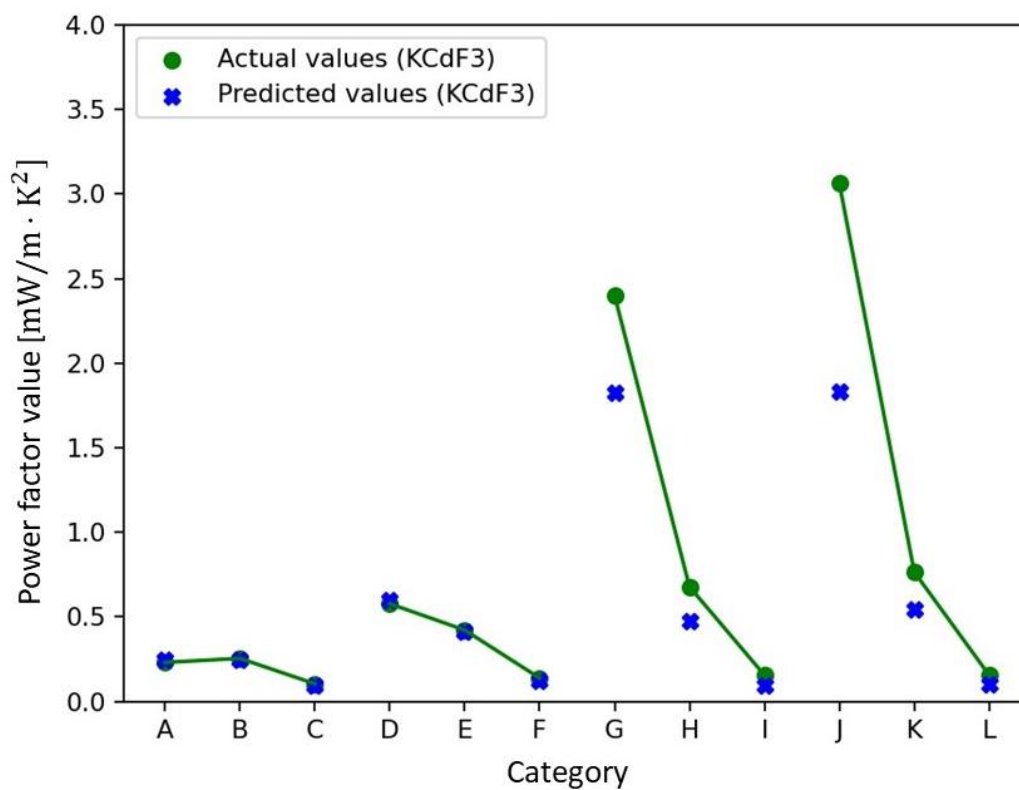

Figure S12: Plot of actual & predicted power factor values (KCdF<sub>3</sub>)

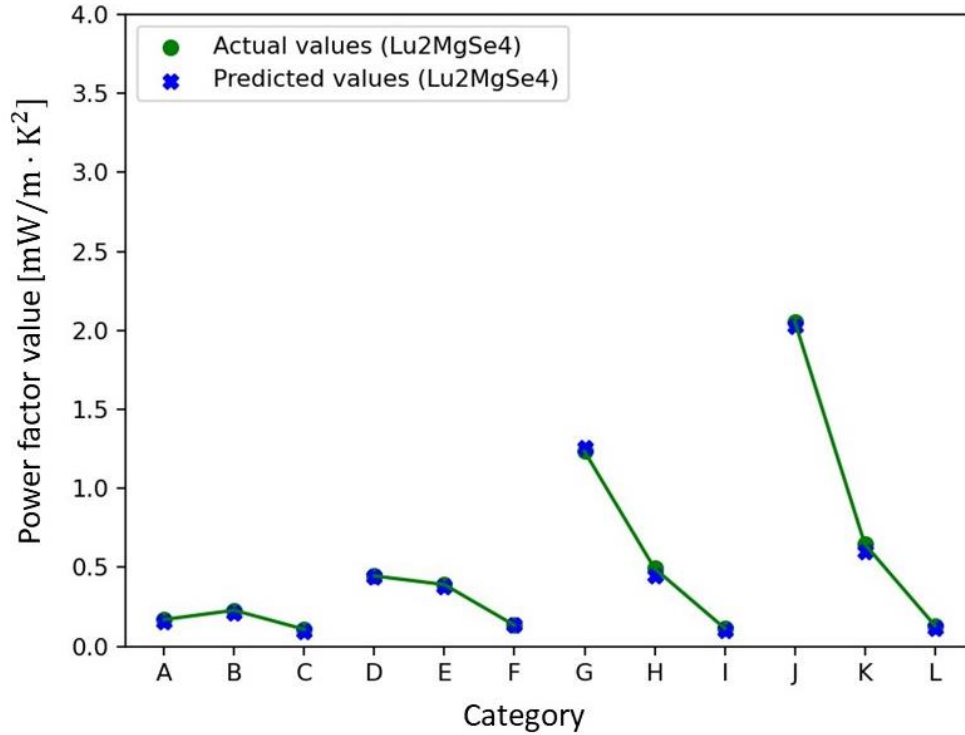

Figure S13: Plot of actual & predicted power factor values (Lu<sub>2</sub>MgSe<sub>4</sub>)

There is a relatively large mismatch between the predicted vs. actual values for two sets of points (conditions A, B and C) for two materials, BaTe and LiZnP at 300K for n-doping. This indicates that the ML has lower accuracy in this region, since it misses the optimally doped point but Boltztrap captures.

Supplementary Table 7. Candidate list predicted by the algorithm.

| No. | cif_id     | Crystal structure  | A | B | C | D | E | F | G | H | I | J | K | L | Total match | Bandgap |
|-----|------------|--------------------|---|---|---|---|---|---|---|---|---|---|---|---|-------------|---------|
| 1   | mp-648     | Na <sub>2</sub> S  | 1 | 1 | 1 | 1 | 1 | 1 | 1 | 1 | 1 | 1 | 1 | 1 | 12          | 2.4399  |
| 2   | mp-252     | BeTe               | 1 | 1 | 1 | 1 | 1 | 1 | 1 | 1 | 1 | 1 | 1 | 1 | 12          | 2.0173  |
| 3   | mp-961683  | LiMgP              | 1 | 1 | 1 | 1 | 1 | 1 | 1 | 1 | 1 | 1 | 1 | 1 | 12          | 1.8107  |
| 4   | mp-971     | K <sub>2</sub> O   | 1 | 1 | 1 | 1 | 1 | 1 | 1 | 1 | 1 | 1 | 1 | 1 | 12          | 1.7072  |
| 5   | mp-1002164 | GeC                | 1 | 1 | 1 | 1 | 1 | 1 | 1 | 1 | 1 | 1 | 1 | 1 | 12          | 1.6502  |
| 6   | mp-961685  | NaCaAs             | 1 | 1 | 1 | 1 | 1 | 1 | 1 | 1 | 1 | 1 | 1 | 1 | 12          | 1.5819  |
| 7   | mp-961698  | LiZnP              | 1 | 1 | 1 | 1 | 1 | 1 | 1 | 1 | 1 | 1 | 1 | 1 | 12          | 1.2971  |
| 8   | mp-961660  | TiFeSe             | 1 | 1 | 1 | 1 | 1 | 1 | 1 | 1 | 1 | 1 | 1 | 1 | 12          | 0.987   |
| 9   | mp-961661  | ZrSiPd             | 1 | 1 | 1 | 1 | 1 | 1 | 1 | 1 | 1 | 1 | 1 | 1 | 12          | 0.7448  |
| 10  | mp-10623   | ThSbRh             | 1 | 1 | 1 | 1 | 1 | 1 | 1 | 1 | 1 | 1 | 1 | 1 | 12          | 0.7444  |
| 11  | mp-1009730 | Ca <sub>2</sub> Sn | 1 | 1 | 1 | 1 | 1 | 1 | 1 | 1 | 1 | 1 | 1 | 1 | 12          | 0.664   |
| 12  | mp-962057  | SrCaSi             | 1 | 1 | 1 | 1 | 1 | 1 | 1 | 1 | 1 | 1 | 1 | 1 | 12          | 0.5002  |
| 13  | mp-1008786 | MgTe               | 1 | 1 | 1 | 1 | 1 | 1 | 1 | 1 | 1 | 1 | 1 | 1 | 12          | 0.4343  |
| 14  | mp-2612    | GeTe               | 1 | 1 | 1 | 1 | 1 | 1 | 1 | 1 | 1 | 1 | 1 | 1 | 12          | 0.3631  |
| 15  | mp-1018118 | TmSbPd             | 1 | 1 | 1 | 1 | 1 | 1 | 1 | 1 | 1 | 1 | 1 | 1 | 12          | 0.3569  |

| No. | cif_id     | Crystal structure | A | B | C | D | E | F | G | H | I | J | K | L | Total match | Bandgap |
|-----|------------|-------------------|---|---|---|---|---|---|---|---|---|---|---|---|-------------|---------|
| 16  | mp-865101  | NaLi2Bi           | 1 | 1 | 1 | 1 | 1 | 1 | 1 | 1 | 1 | 1 | 1 | 1 | 12          | 0.3251  |
| 17  | mp-1002124 | HfC               | 1 | 1 | 1 | 1 | 1 | 1 | 1 | 1 | 1 | 1 | 1 | 1 | 12          | 0.2957  |
| 18  | mp-11390   | LiGaSi            | 1 | 1 | 1 | 1 | 1 | 1 | 1 | 1 | 1 | 1 | 1 | 1 | 12          | 0.1909  |
| 19  | mp-962065  | SrCaSn            | 1 | 1 | 1 | 1 | 1 | 1 | 1 | 1 | 1 | 1 | 1 | 1 | 12          | 0.1582  |
| 20  | mp-3161    | LiAlSi            | 1 | 1 | 1 | 1 | 1 | 1 | 1 | 1 | 1 | 1 | 1 | 1 | 12          | 0.1121  |
| 21  | mp-962064  | NaYSn             | 1 | 1 | 1 | 1 | 1 | 1 | 1 | 1 | 1 | 1 | 1 | 1 | 12          | 0.1018  |
| 22  | mp-1000    | BaTe              | 1 | 1 | 1 | 1 | 1 | 1 | 1 | 1 | 1 | 1 | 1 | 1 | 12          | 1.593   |
| 23  | mp-1779    | YbTe              | 1 | 1 | 1 | 1 | 1 | 1 | 1 | 1 | 1 | 1 | 1 | 1 | 12          | 1.4688  |
| 24  | mp-10182   | LiZnP             | 1 | 1 | 1 | 1 | 1 | 1 | 1 | 1 | 1 | 1 | 1 | 1 | 12          | 1.3386  |
| 25  | mp-1394    | Rb2O              | 1 | 1 | 1 | 1 | 1 | 1 | 1 | 1 | 1 | 1 | 1 | 1 | 12          | 1.3192  |
| 26  | mp-19717   | TePb              | 1 | 1 | 1 | 1 | 1 | 1 | 1 | 1 | 1 | 1 | 1 | 1 | 12          | 0.8072  |
| 27  | mp-2074    | Li3Sb             | 1 | 1 | 1 | 1 | 1 | 1 | 1 | 1 | 1 | 1 | 1 | 1 | 12          | 0.6961  |
| 28  | mp-5077    | NaLi2Sb           | 1 | 1 | 1 | 1 | 1 | 1 | 1 | 1 | 1 | 1 | 1 | 1 | 12          | 0.68    |
| 29  | mp-149     | Si                | 1 | 1 | 1 | 1 | 1 | 1 | 1 | 1 | 1 | 1 | 1 | 1 | 12          | 0.6119  |
| 30  | mp-20351   | InP               | 1 | 1 | 1 | 1 | 1 | 1 | 1 | 1 | 1 | 1 | 1 | 1 | 12          | 0.4679  |
| 31  | mp-505297  | NbSbRu            | 1 | 1 | 1 | 1 | 1 | 1 | 1 | 1 | 1 | 1 | 1 | 1 | 12          | 0.3749  |
| 32  | mp-30373   | RbAu              | 1 | 1 | 1 | 1 | 1 | 1 | 1 | 1 | 1 | 1 | 1 | 1 | 12          | 0.3714  |
| 33  | mp-23222   | Li3Bi             | 1 | 1 | 1 | 1 | 1 | 1 | 1 | 1 | 1 | 1 | 1 | 1 | 12          | 0.3429  |
| 34  | mp-1367    | Mg2Si             | 1 | 1 | 1 | 1 | 1 | 1 | 1 | 1 | 1 | 1 | 1 | 1 | 12          | 0.2169  |
| 35  | mp-408     | Mg2Ge             | 1 | 1 | 1 | 1 | 1 | 1 | 1 | 1 | 1 | 1 | 1 | 1 | 12          | 0.1689  |
| 36  | mp-1876    | SnS               | 1 | 1 | 1 | 1 | 1 | 1 | 1 | 1 | 1 | 1 | 1 | 1 | 12          | 0.0894  |
| 37  | mp-631505  | BeCuBr            | 1 | 1 | 1 | 1 | 1 | 1 | 1 | 1 | 1 | 1 | 1 | 1 | 12          | 0.077   |
| 38  | mp-5920    | LiAlGe            | 1 | 1 | 1 | 1 | 1 | 1 | 1 | 1 | 1 | 1 | 1 | 1 | 12          | 0.0564  |
| 39  | mp-961665  | MgScGa            | 1 | 1 | 1 | 1 | 1 | 1 | 1 | 1 | 1 | 1 | 1 | 1 | 12          | 0.0554  |
| 40  | mp-867912  | Ba2SnHg           | 1 | 1 | 1 | 1 | 1 | 1 | 1 | 1 | 1 | 1 | 1 | 1 | 12          | 0.0498  |
| 41  | mp-962062  | BaSrSn            | 1 | 1 | 1 | 1 | 1 | 1 | 1 | 1 | 1 | 1 | 1 | 1 | 12          | 0.0028  |
| 42  | mp-12719   | LiNdSn            | 1 | 1 | 1 | 1 | 1 | 1 | 1 | 1 | 1 | 1 | 1 | 1 | 12          | 0       |
| 43  | mp-961676  | HfGePt            | 1 | 1 | 1 | 1 | 1 | 1 | 1 | 1 | 1 | 1 | 1 | 1 | 12          | 0       |
| 44  | mp-865142  | DyMgZn2           | 1 | 1 | 1 | 1 | 1 | 1 | 1 | 1 | 1 | 1 | 1 | 1 | 12          | 0       |
| 45  | mp-631387  | SnRuW             | 1 | 1 | 1 | 1 | 1 | 1 | 1 | 1 | 1 | 1 | 1 | 1 | 12          | 0       |
| 46  | mp-1766    | TmS               | 1 | 1 | 1 | 1 | 1 | 1 | 1 | 1 | 1 | 1 | 1 | 1 | 12          | 0       |
| 47  | mp-862755  | PrCd3             | 1 | 1 | 1 | 1 | 1 | 1 | 1 | 1 | 1 | 1 | 1 | 1 | 12          | 0       |
| 48  | mp-974253  | HoErZn2           | 1 | 1 | 1 | 1 | 1 | 1 | 1 | 1 | 1 | 1 | 1 | 1 | 12          | 0       |
| 49  | mp-712     | YCu               | 1 | 1 | 1 | 1 | 1 | 1 | 1 | 1 | 1 | 1 | 1 | 1 | 12          | 0       |
| 50  | mp-631570  | BaTaB             | 1 | 1 | 1 | 1 | 1 | 1 | 1 | 1 | 1 | 1 | 1 | 1 | 12          | 0       |
| 51  | mp-631429  | ZrCrFe            | 1 | 1 | 1 | 1 | 1 | 1 | 1 | 1 | 1 | 1 | 1 | 1 | 12          | 0       |
| 52  | mp-972     | MnSe              | 1 | 1 | 1 | 1 | 1 | 1 | 1 | 1 | 1 | 1 | 1 | 1 | 12          | 0       |
| 53  | mp-1352    | ZrN               | 1 | 1 | 1 | 1 | 1 | 1 | 1 | 1 | 1 | 1 | 1 | 1 | 12          | 0       |
| 54  | mp-213     | CaPd              | 1 | 1 | 1 | 1 | 1 | 1 | 1 | 1 | 1 | 1 | 1 | 1 | 12          | 0       |
| 55  | mp-972630  | SmErZn2           | 1 | 1 | 1 | 1 | 1 | 1 | 1 | 1 | 1 | 1 | 1 | 1 | 12          | 0       |
| 56  | mp-961725  | CrGeRh            | 1 | 1 | 1 | 1 | 1 | 1 | 1 | 1 | 1 | 1 | 1 | 1 | 12          | 0       |
| 57  | mp-631568  | AlAgB             | 1 | 1 | 1 | 1 | 1 | 1 | 1 | 1 | 1 | 1 | 1 | 1 | 12          | 0       |
| 58  | mp-2861    | CaTi              | 1 | 1 | 1 | 1 | 1 | 1 | 1 | 1 | 1 | 1 | 1 | 1 | 12          | 0       |
| 59  | mp-12718   | LiPrSn            | 1 | 1 | 1 | 1 | 1 | 1 | 1 | 1 | 1 | 1 | 1 | 1 | 12          | 0       |

| No. | cif_id     | Crystal structure | A | B | C | D | E | F | G | H | I | J | K | L | Total match | Bandgap |
|-----|------------|-------------------|---|---|---|---|---|---|---|---|---|---|---|---|-------------|---------|
| 60  | mp-1018106 | YbBiPt            | 1 | 1 | 1 | 1 | 1 | 1 | 1 | 1 | 1 | 1 | 1 | 1 | 12          | 0       |
| 61  | mp-2459    | YbIn              | 1 | 1 | 1 | 1 | 1 | 1 | 1 | 1 | 1 | 1 | 1 | 1 | 12          | 0       |
| 62  | mp-962068  | CaMgSn            | 1 | 1 | 1 | 1 | 1 | 1 | 1 | 1 | 1 | 1 | 1 | 1 | 12          | 0       |
| 63  | mp-11566   | ScZn              | 1 | 1 | 1 | 1 | 1 | 1 | 1 | 1 | 1 | 1 | 1 | 1 | 12          | 0       |
| 64  | mp-2054    | TbHg              | 1 | 1 | 1 | 1 | 1 | 1 | 1 | 1 | 1 | 1 | 1 | 1 | 12          | 0       |
| 65  | mp-962078  | CaCdSi            | 1 | 1 | 1 | 1 | 1 | 1 | 1 | 1 | 1 | 1 | 1 | 1 | 12          | 0       |
| 66  | mp-861948  | LiPm2Al           | 1 | 1 | 1 | 1 | 1 | 1 | 1 | 1 | 1 | 1 | 1 | 1 | 12          | 0       |
| 67  | mp-973841  | LiHo2Al           | 1 | 1 | 1 | 1 | 1 | 1 | 1 | 1 | 1 | 1 | 1 | 1 | 12          | 0       |
| 68  | mp-1008727 | Ti2Ge             | 1 | 1 | 1 | 1 | 1 | 1 | 1 | 1 | 1 | 1 | 1 | 1 | 12          | 0       |
| 69  | mp-10902   | PrAl              | 1 | 1 | 1 | 1 | 1 | 1 | 1 | 1 | 1 | 1 | 1 | 1 | 12          | 0       |
| 70  | mp-2434    | SrTi              | 1 | 1 | 1 | 1 | 1 | 1 | 1 | 1 | 1 | 1 | 1 | 1 | 12          | 0       |
| 71  | mp-983425  | Li2PmGe           | 1 | 1 | 1 | 1 | 1 | 1 | 1 | 1 | 1 | 1 | 1 | 1 | 12          | 0       |
| 72  | mp-866017  | LiNd2Al           | 1 | 1 | 1 | 1 | 1 | 1 | 1 | 1 | 1 | 1 | 1 | 1 | 12          | 0       |
| 73  | mp-631562  | SiBAu             | 1 | 1 | 1 | 1 | 1 | 1 | 1 | 1 | 1 | 1 | 1 | 1 | 12          | 0       |
| 74  | mp-975789  | PrTmMg2           | 1 | 1 | 1 | 1 | 1 | 1 | 1 | 1 | 1 | 1 | 1 | 1 | 12          | 0       |
| 75  | mp-11475   | TmHg              | 1 | 1 | 1 | 1 | 1 | 1 | 1 | 1 | 1 | 1 | 1 | 1 | 12          | 0       |
| 76  | mp-1014230 | TiZn              | 1 | 1 | 1 | 1 | 1 | 1 | 1 | 1 | 1 | 1 | 1 | 1 | 12          | 0       |
| 77  | mp-295     | HoAs              | 1 | 1 | 1 | 1 | 1 | 1 | 1 | 1 | 1 | 1 | 1 | 1 | 12          | 0       |
| 78  | mp-861955  | LiPm2Ge           | 1 | 1 | 1 | 1 | 1 | 1 | 1 | 1 | 1 | 1 | 1 | 1 | 12          | 0       |
| 79  | mp-631521  | BaHfMo            | 1 | 1 | 1 | 1 | 1 | 1 | 1 | 1 | 1 | 1 | 1 | 1 | 12          | 0       |
| 80  | mp-12753   | GdAl              | 1 | 1 | 1 | 1 | 1 | 1 | 1 | 1 | 1 | 1 | 1 | 1 | 12          | 0       |
| 81  | mp-631471  | YScBe             | 1 | 1 | 1 | 1 | 1 | 1 | 1 | 1 | 1 | 1 | 1 | 1 | 12          | 0       |
| 82  | mp-460     | PrZn              | 1 | 1 | 1 | 1 | 1 | 1 | 1 | 1 | 1 | 1 | 1 | 1 | 12          | 0       |
| 83  | mp-2823    | NdP               | 1 | 1 | 1 | 1 | 1 | 1 | 1 | 1 | 1 | 1 | 1 | 1 | 12          | 0       |
| 84  | mp-975822  | PrNdZn2           | 1 | 1 | 1 | 1 | 1 | 1 | 1 | 1 | 1 | 1 | 1 | 1 | 12          | 0       |
| 85  | mp-978512  | SmTmMg2           | 1 | 1 | 1 | 1 | 1 | 1 | 1 | 1 | 1 | 1 | 1 | 1 | 12          | 0       |
| 86  | mp-972456  | Sm3V              | 1 | 1 | 1 | 1 | 1 | 1 | 1 | 1 | 1 | 1 | 1 | 1 | 12          | 0       |
| 87  | mp-977551  | ErLuMg2           | 1 | 1 | 1 | 1 | 1 | 1 | 1 | 1 | 1 | 1 | 1 | 1 | 12          | 0       |
| 88  | mp-631544  | BaSiB             | 1 | 1 | 1 | 1 | 1 | 1 | 1 | 1 | 1 | 1 | 1 | 1 | 12          | 0       |
| 89  | mp-1156    | GaSb              | 1 | 1 | 1 | 1 | 1 | 1 | 1 | 1 | 1 | 1 | 1 | 1 | 12          | 0       |
| 90  | mp-20389   | Na2CdPb           | 1 | 1 | 1 | 1 | 1 | 1 | 1 | 1 | 1 | 1 | 1 | 1 | 12          | 0       |
| 91  | mp-2597    | InTe              | 1 | 1 | 1 | 1 | 1 | 1 | 1 | 1 | 1 | 1 | 1 | 1 | 12          | 0       |
| 92  | mp-754545  | NdO               | 1 | 1 | 1 | 1 | 1 | 1 | 1 | 1 | 1 | 1 | 1 | 1 | 12          | 0       |
| 93  | mp-2796    | TmAg              | 1 | 1 | 1 | 1 | 1 | 1 | 1 | 1 | 1 | 1 | 1 | 1 | 12          | 0       |
| 94  | mp-865426  | YbNdAg2           | 1 | 1 | 1 | 1 | 1 | 1 | 1 | 1 | 1 | 1 | 1 | 1 | 12          | 0       |
| 95  | mp-631554  | Na2TiAu           | 1 | 1 | 1 | 1 | 1 | 1 | 1 | 1 | 1 | 1 | 1 | 1 | 12          | 0       |
| 96  | mp-631422  | CuSiBr            | 1 | 1 | 1 | 1 | 1 | 1 | 1 | 1 | 1 | 1 | 1 | 1 | 12          | 0       |
| 97  | mp-864799  | HoLuMg2           | 1 | 1 | 1 | 1 | 1 | 1 | 1 | 1 | 1 | 1 | 1 | 1 | 12          | 0       |
| 98  | mp-12793   | NdAl              | 1 | 1 | 1 | 1 | 1 | 1 | 1 | 1 | 1 | 1 | 1 | 1 | 12          | 0       |
| 99  | mp-976151  | PrErMg2           | 1 | 1 | 1 | 1 | 1 | 1 | 1 | 1 | 1 | 1 | 1 | 1 | 12          | 0       |
| 100 | mp-11469   | PrHg              | 1 | 1 | 1 | 1 | 1 | 1 | 1 | 1 | 1 | 1 | 1 | 1 | 12          | 0       |
| 101 | mp-2988    | Li2GaRh           | 1 | 1 | 1 | 1 | 1 | 1 | 1 | 1 | 1 | 1 | 1 | 1 | 12          | 0       |
| 102 | mp-2696    | MgAg              | 1 | 1 | 1 | 1 | 1 | 1 | 1 | 1 | 1 | 1 | 1 | 1 | 12          | 0       |
| 103 | mp-631531  | NbBW              | 1 | 1 | 1 | 1 | 1 | 1 | 1 | 1 | 1 | 1 | 1 | 1 | 12          | 0       |

| No. | cif_id     | Crystal structure | A | B | C | D | E | F | G | H | I | J | K | L | Total match | Bandgap |
|-----|------------|-------------------|---|---|---|---|---|---|---|---|---|---|---|---|-------------|---------|
| 104 | mp-24650   | YH2               | 1 | 1 | 1 | 1 | 1 | 1 | 1 | 1 | 1 | 1 | 1 | 1 | 12          | 0       |
| 105 | mp-981311  | SrTlHg2           | 1 | 1 | 1 | 1 | 1 | 1 | 1 | 1 | 1 | 1 | 1 | 1 | 12          | 0       |
| 106 | mp-2857    | ScN               | 1 | 1 | 1 | 1 | 1 | 1 | 1 | 1 | 1 | 1 | 1 | 1 | 12          | 0       |
| 107 | mp-862902  | PmDyMg2           | 1 | 1 | 1 | 1 | 1 | 1 | 1 | 1 | 1 | 1 | 1 | 1 | 12          | 0       |
| 108 | mp-2167    | DyAg              | 1 | 1 | 1 | 1 | 1 | 1 | 1 | 1 | 1 | 1 | 1 | 1 | 12          | 0       |
| 109 | mp-1955    | ErCu              | 1 | 1 | 1 | 1 | 1 | 1 | 1 | 1 | 1 | 1 | 1 | 1 | 12          | 0       |
| 110 | mp-23171   | PrBi              | 1 | 1 | 1 | 1 | 1 | 1 | 1 | 1 | 1 | 1 | 1 | 1 | 12          | 0       |
| 111 | mp-2249    | HoZn              | 1 | 1 | 1 | 1 | 1 | 1 | 1 | 1 | 1 | 1 | 1 | 1 | 12          | 0       |
| 112 | mp-972522  | SmTmZn2           | 1 | 1 | 1 | 1 | 1 | 1 | 1 | 1 | 1 | 1 | 1 | 1 | 12          | 0       |
| 113 | mp-976008  | NdTmMg2           | 1 | 1 | 1 | 1 | 1 | 1 | 1 | 1 | 1 | 1 | 1 | 1 | 12          | 0       |
| 114 | mp-1586    | NdSb              | 1 | 1 | 1 | 1 | 1 | 1 | 1 | 1 | 1 | 1 | 1 | 1 | 12          | 0       |
| 115 | mp-866015  | CaPrZn2           | 1 | 1 | 1 | 1 | 1 | 1 | 1 | 1 | 1 | 1 | 1 | 1 | 12          | 0       |
| 116 | mp-656     | LuS               | 1 | 1 | 1 | 1 | 1 | 1 | 1 | 1 | 1 | 1 | 1 | 1 | 12          | 0       |
| 117 | mp-2302    | AsRh2             | 1 | 1 | 1 | 1 | 1 | 1 | 1 | 1 | 1 | 1 | 1 | 1 | 12          | 0       |
| 118 | mp-11313   | ZrCd3             | 1 | 1 | 1 | 1 | 1 | 1 | 1 | 1 | 1 | 1 | 1 | 1 | 12          | 0       |
| 119 | mp-30648   | LiMg2Ga           | 1 | 1 | 1 | 1 | 1 | 1 | 1 | 1 | 1 | 1 | 1 | 1 | 12          | 0       |
| 120 | mp-972156  | TbY3              | 1 | 1 | 1 | 1 | 1 | 1 | 1 | 1 | 1 | 1 | 1 | 1 | 12          | 0       |
| 121 | mp-961645  | LiAlGe            | 1 | 1 | 1 | 1 | 1 | 1 | 1 | 1 | 1 | 1 | 1 | 1 | 12          | 0       |
| 122 | mp-983126  | HoTmZn2           | 1 | 1 | 1 | 1 | 1 | 1 | 1 | 1 | 1 | 1 | 1 | 1 | 12          | 0       |
| 123 | mp-2525    | PrAg              | 1 | 1 | 1 | 1 | 1 | 1 | 1 | 1 | 1 | 1 | 1 | 1 | 12          | 0       |
| 124 | mp-11503   | MnZn              | 1 | 1 | 1 | 1 | 1 | 1 | 1 | 1 | 1 | 1 | 1 | 1 | 12          | 0       |
| 125 | mp-631317  | NaIrPb            | 1 | 1 | 1 | 1 | 1 | 1 | 1 | 1 | 1 | 1 | 1 | 1 | 12          | 0       |
| 126 | mp-862740  | Sr2TlCd           | 1 | 1 | 1 | 1 | 1 | 1 | 1 | 1 | 1 | 1 | 1 | 1 | 12          | 0       |
| 127 | mp-979937  | Yb3Ru             | 1 | 1 | 1 | 1 | 1 | 1 | 1 | 1 | 1 | 1 | 1 | 1 | 12          | 0       |
| 128 | mp-862964  | PmSmMg2           | 1 | 1 | 1 | 1 | 1 | 1 | 1 | 1 | 1 | 1 | 1 | 1 | 12          | 0       |
| 129 | mp-631314  | KTaPt             | 1 | 1 | 1 | 1 | 1 | 1 | 1 | 1 | 1 | 1 | 1 | 1 | 12          | 0       |
| 130 | mp-979417  | DyYCd2            | 1 | 1 | 1 | 1 | 1 | 1 | 1 | 1 | 1 | 1 | 1 | 1 | 12          | 0       |
| 131 | mp-999484  | YTi               | 1 | 1 | 1 | 1 | 1 | 1 | 1 | 1 | 1 | 1 | 1 | 1 | 12          | 0       |
| 132 | mp-24287   | CrH               | 1 | 1 | 1 | 1 | 1 | 1 | 1 | 1 | 1 | 1 | 1 | 1 | 12          | 0       |
| 133 | mp-1837    | TbCu              | 1 | 1 | 1 | 1 | 1 | 1 | 1 | 1 | 1 | 1 | 1 | 1 | 12          | 0       |
| 134 | mp-1008753 | Ti2Al             | 1 | 1 | 1 | 1 | 1 | 1 | 1 | 1 | 1 | 1 | 1 | 1 | 12          | 0       |
| 135 | mp-1009538 | PdC               | 1 | 1 | 1 | 1 | 1 | 1 | 1 | 1 | 1 | 1 | 1 | 1 | 12          | 0       |
| 136 | mp-614455  | GdCu              | 1 | 1 | 1 | 1 | 1 | 1 | 1 | 1 | 1 | 1 | 1 | 1 | 12          | 0       |
| 137 | mp-978513  | SmErMg2           | 1 | 1 | 1 | 1 | 1 | 1 | 1 | 1 | 1 | 1 | 1 | 1 | 12          | 0       |
| 138 | mp-972640  | SmDyZn2           | 1 | 1 | 1 | 1 | 1 | 1 | 1 | 1 | 1 | 1 | 1 | 1 | 12          | 0       |
| 139 | mp-2343    | Mg2Sn             | 1 | 1 | 1 | 1 | 1 | 1 | 1 | 1 | 1 | 1 | 1 | 1 | 12          | 0       |
| 140 | mp-631311  | IrOsW             | 1 | 1 | 1 | 1 | 1 | 1 | 1 | 1 | 1 | 1 | 1 | 1 | 12          | 0       |
| 141 | mp-631542  | BaZrNi            | 1 | 1 | 1 | 1 | 1 | 1 | 1 | 1 | 1 | 1 | 1 | 1 | 12          | 0       |
| 142 | mp-862937  | PmMgZn2           | 1 | 1 | 1 | 1 | 1 | 1 | 1 | 1 | 1 | 1 | 1 | 1 | 12          | 0       |
| 143 | mp-1009458 | NbC               | 1 | 1 | 1 | 1 | 1 | 1 | 1 | 1 | 1 | 1 | 1 | 1 | 12          | 0       |
| 144 | mp-2532    | PrTe              | 1 | 1 | 1 | 1 | 1 | 1 | 1 | 1 | 1 | 1 | 1 | 1 | 12          | 0       |
| 145 | mp-1236    | NdAg              | 1 | 1 | 1 | 1 | 1 | 1 | 1 | 1 | 1 | 1 | 1 | 1 | 12          | 0       |
| 146 | mp-631492  | BaSclr            | 1 | 1 | 1 | 1 | 1 | 1 | 1 | 1 | 1 | 1 | 1 | 1 | 12          | 0       |
| 147 | mp-962069  | LiAgTe            | 1 | 1 | 1 | 1 | 1 | 1 | 1 | 1 | 1 | 1 | 1 | 1 | 12          | 0       |

| No. | cif_id     | Crystal structure | A | B | C | D | E | F | G | H | I | J | K | L | Total match | Bandgap |
|-----|------------|-------------------|---|---|---|---|---|---|---|---|---|---|---|---|-------------|---------|
| 148 | mp-2470    | DyS               | 1 | 1 | 1 | 1 | 1 | 1 | 1 | 1 | 1 | 1 | 1 | 1 | 12          | 0       |
| 149 | mp-2334    | DyCu              | 1 | 1 | 1 | 1 | 1 | 1 | 1 | 1 | 1 | 1 | 1 | 1 | 12          | 0       |
| 150 | mp-1008876 | MnCoS             | 1 | 1 | 1 | 1 | 1 | 1 | 1 | 1 | 1 | 1 | 1 | 1 | 12          | 0       |
| 151 | mp-2497    | GdZn              | 1 | 1 | 1 | 1 | 1 | 1 | 1 | 1 | 1 | 1 | 1 | 1 | 12          | 0       |
| 152 | mp-11274   | BePd              | 1 | 1 | 1 | 1 | 1 | 1 | 1 | 1 | 1 | 1 | 1 | 1 | 12          | 0       |
| 153 | mp-11563   | TiRh              | 1 | 1 | 1 | 1 | 1 | 1 | 1 | 1 | 1 | 1 | 1 | 1 | 12          | 0       |
| 154 | mp-631534  | NaSrRe2           | 1 | 1 | 1 | 1 | 1 | 1 | 1 | 1 | 1 | 1 | 1 | 1 | 12          | 0       |
| 155 | mp-631383  | MnCrRe            | 1 | 1 | 1 | 1 | 1 | 1 | 1 | 1 | 1 | 1 | 1 | 1 | 12          | 0       |
| 156 | mp-972601  | SmLuMg2           | 1 | 1 | 1 | 1 | 1 | 1 | 1 | 1 | 1 | 1 | 1 | 1 | 12          | 0       |
| 157 | mp-1971    | HoCu              | 1 | 1 | 1 | 1 | 1 | 1 | 1 | 1 | 1 | 1 | 1 | 1 | 12          | 0       |
| 158 | mp-631541  | BeGeB             | 1 | 1 | 1 | 1 | 1 | 1 | 1 | 1 | 1 | 1 | 1 | 1 | 12          | 0       |
| 159 | mp-861886  | LiDyHg2           | 1 | 1 | 1 | 1 | 1 | 1 | 1 | 1 | 1 | 1 | 1 | 1 | 12          | 0       |
| 160 | mp-11344   | PrO               | 1 | 1 | 1 | 1 | 1 | 1 | 1 | 1 | 1 | 1 | 1 | 1 | 12          | 0       |
| 161 | mp-1008901 | MgH2              | 1 | 1 | 1 | 1 | 1 | 1 | 1 | 1 | 1 | 1 | 1 | 1 | 12          | 0       |
| 162 | mp-631337  | NaTaNi            | 1 | 1 | 1 | 1 | 1 | 1 | 1 | 1 | 1 | 1 | 1 | 1 | 12          | 0       |
| 163 | mp-836     | TbZn              | 1 | 1 | 1 | 1 | 1 | 1 | 1 | 1 | 1 | 1 | 1 | 1 | 12          | 0       |
| 164 | mp-865911  | YbPmHg2           | 1 | 1 | 1 | 1 | 1 | 1 | 1 | 1 | 1 | 1 | 1 | 1 | 12          | 0       |
| 165 | mp-865896  | YbPmAg2           | 1 | 1 | 1 | 1 | 1 | 1 | 1 | 1 | 1 | 1 | 1 | 1 | 12          | 0       |
| 166 | mp-978823  | SmY3              | 1 | 1 | 1 | 1 | 1 | 1 | 1 | 1 | 1 | 1 | 1 | 1 | 12          | 0       |
| 167 | mp-24724   | TbH2              | 1 | 1 | 1 | 1 | 1 | 1 | 1 | 1 | 1 | 1 | 1 | 1 | 12          | 0       |
| 168 | mp-1008920 | Mn2Ge             | 1 | 1 | 1 | 1 | 1 | 1 | 1 | 1 | 1 | 1 | 1 | 1 | 12          | 0       |
| 169 | mp-2195    | LuMg              | 1 | 1 | 1 | 1 | 1 | 1 | 1 | 1 | 1 | 1 | 1 | 1 | 12          | 0       |
| 170 | mp-2268    | TbAg              | 1 | 1 | 1 | 1 | 1 | 1 | 1 | 1 | 1 | 1 | 1 | 1 | 12          | 0       |
| 171 | mp-631394  | CaZrPd            | 1 | 1 | 1 | 1 | 1 | 1 | 1 | 1 | 1 | 1 | 1 | 1 | 12          | 0       |
| 172 | mp-631349  | ZnTcMo            | 1 | 1 | 1 | 1 | 1 | 1 | 1 | 1 | 1 | 1 | 1 | 1 | 12          | 0       |
| 173 | mp-631319  | LiTiRe            | 1 | 1 | 1 | 1 | 1 | 1 | 1 | 1 | 1 | 1 | 1 | 1 | 12          | 0       |
| 174 | mp-962071  | MgScTi            | 1 | 1 | 1 | 1 | 1 | 1 | 1 | 1 | 1 | 1 | 1 | 1 | 12          | 0       |
| 175 | mp-982388  | HoTmMg2           | 1 | 1 | 1 | 1 | 1 | 1 | 1 | 1 | 1 | 1 | 1 | 1 | 12          | 0       |
| 176 | mp-973276  | HoLuCd2           | 1 | 1 | 1 | 1 | 1 | 1 | 1 | 1 | 1 | 1 | 1 | 1 | 12          | 0       |
| 177 | mp-34611   | ZnAgAs            | 1 | 1 | 1 | 1 | 1 | 1 | 1 | 1 | 1 | 1 | 1 | 1 | 12          | 0       |
| 178 | mp-867222  | LiCa2Ir           | 1 | 1 | 1 | 1 | 1 | 1 | 1 | 1 | 1 | 1 | 1 | 1 | 12          | 0       |
| 179 | mp-1001844 | HoN               | 1 | 1 | 1 | 1 | 1 | 1 | 1 | 1 | 1 | 1 | 1 | 1 | 12          | 0       |
| 180 | mp-1014219 | HfZn              | 1 | 1 | 1 | 1 | 1 | 1 | 1 | 1 | 1 | 1 | 1 | 1 | 12          | 0       |
| 181 | mp-22873   | SmBi              | 1 | 1 | 1 | 1 | 1 | 1 | 1 | 1 | 1 | 1 | 1 | 1 | 12          | 0       |
| 182 | mp-631440  | BiTelr            | 1 | 1 | 1 | 1 | 1 | 1 | 1 | 1 | 1 | 1 | 1 | 1 | 12          | 0       |
| 183 | mp-542779  | GdAg              | 1 | 1 | 1 | 1 | 1 | 1 | 1 | 1 | 1 | 1 | 1 | 1 | 12          | 0       |
| 184 | mp-980198  | TmLuZn2           | 1 | 1 | 1 | 1 | 1 | 1 | 1 | 1 | 1 | 1 | 1 | 1 | 12          | 0       |
| 185 | mp-978094  | NdHo3             | 1 | 1 | 1 | 1 | 1 | 1 | 1 | 1 | 1 | 1 | 1 | 1 | 12          | 0       |
| 186 | mp-980055  | YErMg2            | 1 | 1 | 1 | 1 | 1 | 1 | 1 | 1 | 1 | 1 | 1 | 1 | 12          | 0       |
| 187 | mp-1240    | HoS               | 1 | 1 | 1 | 1 | 1 | 1 | 1 | 1 | 1 | 1 | 1 | 1 | 12          | 0       |
| 188 | mp-961688  | VGaPt             | 1 | 1 | 1 | 1 | 1 | 1 | 1 | 1 | 1 | 1 | 1 | 1 | 12          | 0       |
| 189 | mp-861913  | LiDy2Al           | 1 | 1 | 1 | 1 | 1 | 1 | 1 | 1 | 1 | 1 | 1 | 1 | 12          | 0       |
| 190 | mp-975997  | NaLi2Pb           | 1 | 1 | 1 | 1 | 1 | 1 | 1 | 1 | 1 | 1 | 1 | 1 | 12          | 0       |
| 191 | mp-961671  | TiGePt            | 1 | 1 | 1 | 1 | 1 | 1 | 1 | 1 | 1 | 1 | 1 | 1 | 12          | 0       |



| No. | cif_id     | Crystal structure | A | B | C | D | E | F | G | H | I | J | K | L | Total match | Bandgap |
|-----|------------|-------------------|---|---|---|---|---|---|---|---|---|---|---|---|-------------|---------|
| 192 | mp-23300   | NdBi              | 1 | 1 | 1 | 1 | 1 | 1 | 1 | 1 | 1 | 1 | 1 | 1 | 12          | 0       |
| 193 | mp-979419  | Dy3Y              | 1 | 1 | 1 | 1 | 1 | 1 | 1 | 1 | 1 | 1 | 1 | 1 | 12          | 0       |
| 194 | mp-571059  | YCd3              | 1 | 1 | 1 | 1 | 1 | 1 | 1 | 1 | 1 | 1 | 1 | 1 | 12          | 0       |
| 195 | mp-866063  | NdDyMg2           | 1 | 1 | 1 | 1 | 1 | 1 | 1 | 1 | 1 | 1 | 1 | 1 | 12          | 0       |
| 196 | mp-2165    | SmZn              | 1 | 1 | 1 | 1 | 1 | 1 | 1 | 1 | 1 | 1 | 1 | 1 | 12          | 0       |
| 197 | mp-2516    | YZn               | 1 | 1 | 1 | 1 | 1 | 1 | 1 | 1 | 1 | 1 | 1 | 1 | 12          | 0       |
| 198 | mp-976030  | PrHoMg2           | 1 | 1 | 1 | 1 | 1 | 1 | 1 | 1 | 1 | 1 | 1 | 1 | 12          | 0       |
| 199 | mp-1008911 | LiMnAs            | 1 | 1 | 1 | 1 | 1 | 1 | 1 | 1 | 1 | 1 | 1 | 1 | 12          | 0       |
| 200 | mp-862918  | PmHoMg2           | 1 | 1 | 1 | 1 | 1 | 1 | 1 | 1 | 1 | 1 | 1 | 1 | 12          | 0       |
| 201 | mp-31453   | NbSbRh            | 1 | 1 | 1 | 1 | 1 | 1 | 1 | 1 | 1 | 1 | 1 | 1 | 12          | 0       |
| 202 | mp-1008    | NiHg              | 1 | 1 | 1 | 1 | 1 | 1 | 1 | 1 | 1 | 1 | 1 | 1 | 12          | 0       |
| 203 | mp-570276  | ZrZn              | 1 | 1 | 1 | 1 | 1 | 1 | 1 | 1 | 1 | 1 | 1 | 1 | 12          | 0       |
| 204 | mp-24289   | HPd               | 1 | 1 | 1 | 1 | 1 | 1 | 1 | 1 | 1 | 1 | 1 | 1 | 12          | 0       |
| 205 | mp-20300   | EuP               | 1 | 1 | 1 | 1 | 1 | 1 | 1 | 1 | 1 | 1 | 1 | 1 | 12          | 0       |
| 206 | mp-1007776 | TlP               | 1 | 1 | 1 | 1 | 1 | 1 | 1 | 1 | 1 | 1 | 1 | 1 | 12          | 0       |
| 207 | mp-866220  | CaNdZn2           | 1 | 1 | 1 | 1 | 1 | 1 | 1 | 1 | 1 | 1 | 1 | 1 | 12          | 0       |
| 208 | mp-2502    | TmCd              | 1 | 1 | 1 | 1 | 1 | 1 | 1 | 1 | 1 | 1 | 1 | 1 | 12          | 0       |
| 209 | mp-11467   | NdHg              | 1 | 1 | 1 | 1 | 1 | 1 | 1 | 1 | 1 | 1 | 1 | 1 | 12          | 0       |
| 210 | mp-631322  | KSnOs             | 1 | 1 | 1 | 1 | 1 | 1 | 1 | 1 | 1 | 1 | 1 | 1 | 12          | 0       |
| 211 | mp-11478   | GaAg              | 1 | 1 | 1 | 1 | 1 | 1 | 1 | 1 | 1 | 1 | 1 | 1 | 12          | 0       |
| 212 | mp-962061  | YMgTl             | 1 | 1 | 1 | 1 | 1 | 1 | 1 | 1 | 1 | 1 | 1 | 1 | 12          | 0       |
| 213 | mp-631382  | YMgCu             | 1 | 1 | 1 | 1 | 1 | 1 | 1 | 1 | 1 | 1 | 1 | 1 | 12          | 0       |
| 214 | mp-972997  | HoErCd2           | 1 | 1 | 1 | 1 | 1 | 1 | 1 | 1 | 1 | 1 | 1 | 1 | 12          | 0       |
| 215 | mp-2636    | GdMg              | 1 | 1 | 1 | 1 | 1 | 1 | 1 | 1 | 1 | 1 | 1 | 1 | 12          | 0       |
| 216 | mp-864598  | LiMg2Ag           | 1 | 1 | 1 | 1 | 1 | 1 | 1 | 1 | 1 | 1 | 1 | 1 | 12          | 0       |
| 217 | mp-11240   | DyAu              | 1 | 1 | 1 | 1 | 1 | 1 | 1 | 1 | 1 | 1 | 1 | 1 | 12          | 0       |
| 218 | mp-615     | YMg               | 1 | 1 | 1 | 1 | 1 | 1 | 1 | 1 | 1 | 1 | 1 | 1 | 12          | 0       |
| 219 | mp-1001837 | MoP               | 1 | 1 | 1 | 1 | 1 | 1 | 1 | 1 | 1 | 1 | 1 | 1 | 12          | 0       |
| 220 | mp-972062  | YbTmHg2           | 1 | 1 | 1 | 1 | 1 | 1 | 1 | 1 | 1 | 1 | 1 | 1 | 12          | 0       |
| 221 | mp-2732    | PRh2              | 1 | 1 | 1 | 1 | 1 | 1 | 1 | 1 | 1 | 1 | 1 | 1 | 12          | 0       |
| 222 | mp-126     | Pt                | 1 | 1 | 1 | 1 | 1 | 1 | 1 | 1 | 1 | 1 | 1 | 1 | 12          | 0       |
| 223 | mp-631324  | HfMnTl            | 1 | 1 | 1 | 1 | 1 | 1 | 1 | 1 | 1 | 1 | 1 | 1 | 12          | 0       |
| 224 | mp-861479  | PrYMg2            | 1 | 1 | 1 | 1 | 1 | 1 | 1 | 1 | 1 | 1 | 1 | 1 | 12          | 0       |
| 225 | mp-760381  | CuS               | 1 | 1 | 1 | 1 | 1 | 1 | 1 | 1 | 1 | 1 | 1 | 1 | 12          | 0       |
| 226 | mp-437     | MgAu              | 1 | 1 | 1 | 1 | 1 | 1 | 1 | 1 | 1 | 1 | 1 | 1 | 12          | 0       |
| 227 | mp-1009663 | ReC               | 1 | 1 | 1 | 1 | 1 | 1 | 1 | 1 | 1 | 1 | 1 | 1 | 12          | 0       |
| 228 | mp-631482  | BiMoRh            | 1 | 1 | 1 | 1 | 1 | 1 | 1 | 1 | 1 | 1 | 1 | 1 | 12          | 0       |
| 229 | mp-11279   | TiBe              | 1 | 1 | 1 | 1 | 1 | 1 | 1 | 1 | 1 | 1 | 1 | 1 | 12          | 0       |
| 230 | mp-2474    | YAg               | 1 | 1 | 1 | 1 | 1 | 1 | 1 | 1 | 1 | 1 | 1 | 1 | 12          | 0       |
| 231 | mp-976426  | LiLuHg2           | 1 | 1 | 1 | 1 | 1 | 1 | 1 | 1 | 1 | 1 | 1 | 1 | 12          | 0       |
| 232 | mp-961680  | NbAlPt            | 1 | 1 | 1 | 1 | 1 | 1 | 1 | 1 | 1 | 1 | 1 | 1 | 12          | 0       |
| 233 | mp-867873  | LiTm2Al           | 1 | 1 | 1 | 1 | 1 | 1 | 1 | 1 | 1 | 1 | 1 | 1 | 12          | 0       |
| 234 | mp-631395  | CaTaTc            | 1 | 1 | 1 | 1 | 1 | 1 | 1 | 1 | 1 | 1 | 1 | 1 | 12          | 0       |
| 235 | mp-980942  | YTmMg2            | 1 | 1 | 1 | 1 | 1 | 1 | 1 | 1 | 1 | 1 | 1 | 1 | 12          | 0       |

| No. | cif_id     | Crystal structure | A | B | C | D | E | F | G | H | I | J | K | L | Total match | Bandgap |
|-----|------------|-------------------|---|---|---|---|---|---|---|---|---|---|---|---|-------------|---------|
| 236 | mp-11576   | YbTi              | 1 | 1 | 1 | 1 | 1 | 1 | 1 | 1 | 1 | 1 | 1 | 1 | 12          | 0       |
| 237 | mp-631484  | TaTiAl            | 1 | 1 | 1 | 1 | 1 | 1 | 1 | 1 | 1 | 1 | 1 | 1 | 12          | 0       |
| 238 | mp-961669  | NbGaPt            | 1 | 1 | 1 | 1 | 1 | 1 | 1 | 1 | 1 | 1 | 1 | 1 | 12          | 0       |
| 239 | mp-1013549 | Ba3BiN            | 1 | 1 | 1 | 1 | 1 | 1 | 1 | 1 | 1 | 1 | 1 | 1 | 12          | 0       |
| 240 | mp-973232  | NdTm3             | 1 | 1 | 1 | 1 | 1 | 1 | 1 | 1 | 1 | 1 | 1 | 1 | 12          | 0       |
| 241 | mp-1660    | ErZn              | 1 | 1 | 1 | 1 | 1 | 1 | 1 | 1 | 1 | 1 | 1 | 1 | 12          | 0       |
| 242 | mp-2778    | HoAg              | 1 | 1 | 1 | 1 | 1 | 1 | 1 | 1 | 1 | 1 | 1 | 1 | 12          | 0       |
| 243 | mp-976143  | PrDyZn2           | 1 | 1 | 1 | 1 | 1 | 1 | 1 | 1 | 1 | 1 | 1 | 1 | 12          | 0       |
| 244 | mp-980082  | YHo3              | 1 | 1 | 1 | 1 | 1 | 1 | 1 | 1 | 1 | 1 | 1 | 1 | 12          | 0       |
| 245 | mp-975886  | PrSmZn2           | 1 | 1 | 1 | 1 | 1 | 1 | 1 | 1 | 1 | 1 | 1 | 1 | 12          | 0       |
| 246 | mp-975972  | PrLuMg2           | 1 | 1 | 1 | 1 | 1 | 1 | 1 | 1 | 1 | 1 | 1 | 1 | 12          | 0       |
| 247 | mp-24152   | HoH2              | 1 | 1 | 1 | 1 | 1 | 1 | 1 | 1 | 1 | 1 | 1 | 1 | 12          | 0       |
| 248 | mp-631546  | TlCoBi            | 1 | 1 | 1 | 1 | 1 | 1 | 1 | 1 | 1 | 1 | 1 | 1 | 12          | 0       |
| 249 | mp-2475    | SmAg              | 1 | 1 | 1 | 1 | 1 | 1 | 1 | 1 | 1 | 1 | 1 | 1 | 12          | 0       |
| 250 | mp-1211    | ScCd              | 1 | 1 | 1 | 1 | 1 | 1 | 1 | 1 | 1 | 1 | 1 | 1 | 12          | 0       |
| 251 | mp-1174    | MgSc              | 1 | 1 | 1 | 1 | 1 | 1 | 1 | 1 | 1 | 1 | 1 | 1 | 12          | 0       |
| 252 | mp-30779   | SmMg3             | 1 | 1 | 1 | 1 | 1 | 1 | 1 | 1 | 1 | 1 | 1 | 1 | 12          | 0       |
| 253 | mp-2283    | ZrCo              | 1 | 1 | 1 | 1 | 1 | 1 | 1 | 1 | 1 | 1 | 1 | 1 | 12          | 0       |
| 254 | mp-978514  | SmTm3             | 1 | 1 | 1 | 1 | 1 | 1 | 1 | 1 | 1 | 1 | 1 | 1 | 12          | 0       |
| 255 | mp-631381  | TeRuSe            | 1 | 1 | 1 | 1 | 1 | 1 | 1 | 1 | 1 | 1 | 1 | 1 | 12          | 0       |
| 256 | mp-867149  | Sr2CdSn           | 1 | 1 | 1 | 1 | 1 | 1 | 1 | 1 | 1 | 1 | 1 | 1 | 12          | 0       |
| 257 | mp-1008726 | Ti2Ga             | 1 | 1 | 1 | 1 | 1 | 1 | 1 | 1 | 1 | 1 | 1 | 1 | 12          | 0       |
| 258 | mp-12586   | SmCu              | 1 | 1 | 1 | 1 | 1 | 1 | 1 | 1 | 1 | 1 | 1 | 1 | 12          | 0       |
| 259 | mp-20724   | Mg2Pb             | 1 | 1 | 1 | 1 | 1 | 1 | 1 | 1 | 1 | 1 | 1 | 1 | 12          | 0       |
| 260 | mp-865210  | TmLuMg2           | 1 | 1 | 1 | 1 | 1 | 1 | 1 | 1 | 1 | 1 | 1 | 1 | 12          | 0       |
| 261 | mp-631373  | TiVW              | 1 | 1 | 1 | 1 | 1 | 1 | 1 | 1 | 1 | 1 | 1 | 1 | 12          | 0       |
| 262 | mp-862555  | LiY2Al            | 1 | 1 | 1 | 1 | 1 | 1 | 1 | 1 | 1 | 1 | 1 | 1 | 12          | 0       |
| 263 | mp-639675  | EuCu              | 1 | 1 | 1 | 1 | 1 | 1 | 1 | 1 | 1 | 1 | 1 | 1 | 12          | 0       |
| 264 | mp-866158  | YLuMg2            | 1 | 1 | 1 | 1 | 1 | 1 | 1 | 1 | 1 | 1 | 1 | 1 | 12          | 0       |
| 265 | mp-631479  | CaHfBe            | 1 | 1 | 1 | 1 | 1 | 1 | 1 | 1 | 1 | 1 | 1 | 1 | 12          | 0       |
| 266 | mp-1785    | PrSb              | 1 | 1 | 1 | 1 | 1 | 1 | 1 | 1 | 1 | 1 | 1 | 1 | 12          | 0       |
| 267 | mp-976032  | PrHoZn2           | 1 | 1 | 1 | 1 | 1 | 1 | 1 | 1 | 1 | 1 | 1 | 1 | 12          | 0       |
| 268 | mp-867159  | SmDyMg2           | 1 | 1 | 1 | 1 | 1 | 1 | 1 | 1 | 1 | 1 | 1 | 1 | 12          | 0       |
| 269 | mp-2640    | TbAs              | 1 | 1 | 1 | 1 | 1 | 1 | 1 | 1 | 1 | 1 | 1 | 1 | 12          | 0       |
| 270 | mp-973058  | LiLu2Al           | 1 | 1 | 1 | 1 | 1 | 1 | 1 | 1 | 1 | 1 | 1 | 1 | 12          | 0       |
| 271 | mp-974517  | NdErMg2           | 1 | 1 | 1 | 1 | 1 | 1 | 1 | 1 | 1 | 1 | 1 | 1 | 12          | 0       |
| 272 | mp-631365  | TeRuPb            | 1 | 1 | 1 | 1 | 1 | 1 | 1 | 1 | 1 | 1 | 1 | 1 | 12          | 0       |
| 273 | mp-1432    | Be2B              | 1 | 1 | 1 | 1 | 1 | 1 | 1 | 1 | 1 | 1 | 1 | 1 | 12          | 0       |
| 274 | mp-973333  | HoLuZn2           | 1 | 1 | 1 | 1 | 1 | 1 | 1 | 1 | 1 | 1 | 1 | 1 | 12          | 0       |
| 275 | mp-862493  | LiEr2Al           | 1 | 1 | 1 | 1 | 1 | 1 | 1 | 1 | 1 | 1 | 1 | 1 | 12          | 0       |
| 276 | mp-631552  | SrBiB             | 1 | 1 | 1 | 1 | 1 | 1 | 1 | 1 | 1 | 1 | 1 | 1 | 12          | 0       |
| 277 | mp-11237   | ScAg              | 1 | 1 | 1 | 1 | 1 | 1 | 1 | 1 | 1 | 1 | 1 | 1 | 12          | 0       |
| 278 | mp-7381    | TbMg3             | 1 | 1 | 1 | 1 | 1 | 1 | 1 | 1 | 1 | 1 | 1 | 1 | 12          | 0       |
| 279 | mp-864630  | LiMg2Hg           | 1 | 1 | 1 | 1 | 1 | 1 | 1 | 1 | 1 | 1 | 1 | 1 | 12          | 0       |

| No. | cif_id     | Crystal structure | A | B | C | D | E | F | G | H | I | J | K | L | Total match | Bandgap |
|-----|------------|-------------------|---|---|---|---|---|---|---|---|---|---|---|---|-------------|---------|
| 280 | mp-976147  | PrEr3             | 1 | 1 | 1 | 1 | 1 | 1 | 1 | 1 | 1 | 1 | 1 | 1 | 12          | 0       |
| 281 | mp-866191  | Li2YbSi           | 1 | 1 | 1 | 1 | 1 | 1 | 1 | 1 | 1 | 1 | 1 | 1 | 12          | 0       |
| 282 | mp-985     | TmCu              | 1 | 1 | 1 | 1 | 1 | 1 | 1 | 1 | 1 | 1 | 1 | 1 | 12          | 0       |
| 283 | mp-974527  | NdSmZn2           | 1 | 1 | 1 | 1 | 1 | 1 | 1 | 1 | 1 | 1 | 1 | 1 | 12          | 0       |
| 284 | mp-973759  | Lu2MgCd           | 1 | 1 | 1 | 1 | 1 | 1 | 1 | 1 | 1 | 1 | 1 | 1 | 12          | 0       |
| 285 | mp-975848  | PrNdMg2           | 1 | 1 | 1 | 1 | 1 | 1 | 1 | 1 | 1 | 1 | 1 | 1 | 12          | 0       |
| 286 | mp-11221   | SmAl              | 1 | 1 | 1 | 1 | 1 | 1 | 1 | 1 | 1 | 1 | 1 | 1 | 12          | 0       |
| 287 | mp-976129  | PrErZn2           | 1 | 1 | 1 | 1 | 1 | 1 | 1 | 1 | 1 | 1 | 1 | 1 | 12          | 0       |
| 288 | mp-2303    | DyZn              | 1 | 1 | 1 | 1 | 1 | 1 | 1 | 1 | 1 | 1 | 1 | 1 | 12          | 0       |
| 289 | mp-961726  | NbGeRh            | 1 | 1 | 1 | 1 | 1 | 1 | 1 | 1 | 1 | 1 | 1 | 1 | 12          | 0       |
| 290 | mp-754940  | Ba3SiO            | 1 | 1 | 1 | 1 | 1 | 1 | 1 | 1 | 1 | 1 | 1 | 1 | 12          | 0       |
| 291 | mp-31168   | Li2AlAg           | 1 | 1 | 1 | 1 | 1 | 1 | 1 | 1 | 1 | 1 | 1 | 1 | 12          | 0       |
| 292 | mp-867163  | Sr2AgPt           | 1 | 1 | 1 | 1 | 1 | 1 | 1 | 1 | 1 | 1 | 1 | 1 | 12          | 0       |
| 293 | mp-1053    | NdZn              | 1 | 1 | 1 | 1 | 1 | 1 | 1 | 1 | 1 | 1 | 1 | 1 | 12          | 0       |
| 294 | mp-631335  | MgTaZn            | 1 | 1 | 1 | 1 | 1 | 1 | 1 | 1 | 1 | 1 | 1 | 1 | 12          | 0       |
| 295 | mp-961699  | NaMgP             | 1 | 1 | 1 | 1 | 1 | 1 | 1 | 1 | 1 | 1 | 1 | 1 | 12          | 0       |
| 296 | mp-12087   | Cu2S              | 1 | 1 | 1 | 1 | 1 | 1 | 1 | 1 | 1 | 1 | 1 | 1 | 12          | 0       |
| 297 | mp-631506  | SrZrCo            | 1 | 1 | 1 | 1 | 1 | 1 | 1 | 1 | 1 | 1 | 1 | 1 | 12          | 0       |
| 298 | mp-867158  | SmCd3             | 1 | 1 | 1 | 1 | 1 | 1 | 1 | 1 | 1 | 1 | 1 | 1 | 12          | 0       |
| 299 | mp-1007819 | CoW               | 1 | 1 | 1 | 1 | 1 | 1 | 1 | 1 | 1 | 1 | 1 | 1 | 12          | 0       |
| 300 | mp-1009135 | MnP               | 1 | 1 | 1 | 1 | 1 | 1 | 1 | 1 | 1 | 1 | 1 | 1 | 12          | 0       |
| 301 | mp-867130  | SmHoMg2           | 1 | 1 | 1 | 1 | 1 | 1 | 1 | 1 | 1 | 1 | 1 | 1 | 12          | 0       |
| 302 | mp-24192   | ErH2              | 1 | 1 | 1 | 1 | 1 | 1 | 1 | 1 | 1 | 1 | 1 | 1 | 12          | 0       |
| 303 | mp-934     | LiTi              | 1 | 1 | 1 | 1 | 1 | 1 | 1 | 1 | 1 | 1 | 1 | 1 | 12          | 0       |
| 304 | mp-710     | SmP               | 1 | 1 | 1 | 1 | 1 | 1 | 1 | 1 | 1 | 1 | 1 | 1 | 12          | 0       |
| 305 | mp-975880  | PrSmMg2           | 1 | 1 | 1 | 1 | 1 | 1 | 1 | 1 | 1 | 1 | 1 | 1 | 12          | 0       |
| 306 | mp-2621    | ErAg              | 1 | 1 | 1 | 1 | 1 | 1 | 1 | 1 | 1 | 1 | 1 | 1 | 12          | 0       |
| 307 | mp-2724    | TbSb              | 1 | 1 | 1 | 1 | 1 | 1 | 1 | 1 | 1 | 1 | 1 | 1 | 12          | 0       |
| 308 | mp-631410  | CdNiP             | 1 | 1 | 1 | 1 | 1 | 1 | 1 | 1 | 1 | 1 | 1 | 1 | 12          | 0       |
| 309 | mp-24237   | ScH2              | 1 | 1 | 1 | 1 | 1 | 1 | 1 | 1 | 1 | 1 | 1 | 1 | 12          | 0       |
| 310 | mp-631269  | LiIrRh            | 1 | 1 | 1 | 1 | 1 | 1 | 1 | 1 | 1 | 1 | 1 | 1 | 12          | 0       |
| 311 | mp-973060  | MgCr              | 1 | 1 | 1 | 1 | 1 | 1 | 1 | 1 | 1 | 1 | 1 | 1 | 12          | 0       |
| 312 | mp-8062    | SiC               | 1 | 1 | 1 | 1 | 1 | 1 | 0 | 1 | 1 | 1 | 1 | 1 | 11          | 1.3704  |
| 313 | mp-961711  | ZrSiPt            | 1 | 1 | 1 | 1 | 1 | 1 | 0 | 1 | 1 | 1 | 1 | 1 | 11          | 1.3298  |
| 314 | mp-1569    | Be2C              | 1 | 1 | 1 | 1 | 1 | 1 | 0 | 1 | 1 | 1 | 1 | 1 | 11          | 1.1637  |
| 315 | mp-961649  | ZrFeTe            | 1 | 1 | 1 | 1 | 1 | 1 | 0 | 1 | 1 | 1 | 1 | 1 | 11          | 1.1558  |
| 316 | mp-961706  | TiSiPt            | 1 | 1 | 1 | 1 | 1 | 1 | 0 | 1 | 1 | 1 | 1 | 1 | 11          | 0.993   |
| 317 | mp-1008680 | TiGePt            | 1 | 1 | 1 | 1 | 1 | 1 | 0 | 1 | 1 | 1 | 1 | 1 | 11          | 0.8819  |
| 318 | mp-997618  | BSb               | 1 | 1 | 1 | 1 | 1 | 1 | 0 | 1 | 1 | 1 | 1 | 1 | 11          | 0.7513  |
| 319 | mp-961774  | BaNaSb            | 1 | 1 | 0 | 1 | 1 | 1 | 1 | 1 | 1 | 1 | 1 | 1 | 11          | 0.7372  |
| 320 | mp-961657  | YNiP              | 1 | 1 | 1 | 1 | 1 | 1 | 0 | 1 | 1 | 1 | 1 | 1 | 11          | 0.7214  |
| 321 | mp-19886   | ThSnPt            | 1 | 1 | 1 | 1 | 1 | 1 | 0 | 1 | 1 | 1 | 1 | 1 | 11          | 0.6738  |
| 322 | mp-7173    | ScSbPt            | 1 | 1 | 1 | 1 | 1 | 1 | 0 | 1 | 1 | 1 | 1 | 1 | 11          | 0.6441  |
| 323 | mp-1009820 | SnC               | 1 | 1 | 1 | 1 | 1 | 1 | 0 | 1 | 1 | 1 | 1 | 1 | 11          | 0.6257  |

| No. | cif_id     | Crystal structure    | A | B | C | D | E | F | G | H | I | J | K | L | Total match | Bandgap |
|-----|------------|----------------------|---|---|---|---|---|---|---|---|---|---|---|---|-------------|---------|
| 324 | mp-961675  | ScNiP                | 1 | 1 | 1 | 1 | 1 | 1 | 0 | 1 | 1 | 1 | 1 | 1 | 11          | 0.5921  |
| 325 | mp-9437    | NbFeSb               | 1 | 1 | 1 | 1 | 1 | 1 | 0 | 1 | 1 | 1 | 1 | 1 | 11          | 0.5138  |
| 326 | mp-961693  | ZrInAu               | 1 | 1 | 1 | 1 | 1 | 1 | 0 | 1 | 1 | 1 | 1 | 1 | 11          | 0.4532  |
| 327 | mp-1009813 | SiSn                 | 1 | 1 | 1 | 1 | 1 | 1 | 1 | 1 | 1 | 0 | 1 | 1 | 11          | 0.4113  |
| 328 | mp-866132  | Na <sub>2</sub> TlSb | 1 | 1 | 0 | 1 | 1 | 1 | 1 | 1 | 1 | 1 | 1 | 1 | 11          | 0.3844  |
| 329 | mp-961663  | SrTePd               | 1 | 1 | 1 | 1 | 1 | 1 | 0 | 1 | 1 | 1 | 1 | 1 | 11          | 0.3215  |
| 330 | mp-961697  | ScGeAu               | 1 | 1 | 1 | 1 | 1 | 1 | 0 | 1 | 1 | 1 | 1 | 1 | 11          | 0.2804  |
| 331 | mp-1315    | MgS                  | 1 | 1 | 1 | 1 | 1 | 1 | 0 | 1 | 1 | 1 | 1 | 1 | 11          | 2.7628  |
| 332 | mp-1550    | AlP                  | 1 | 1 | 1 | 1 | 1 | 1 | 1 | 1 | 1 | 0 | 1 | 1 | 11          | 1.6302  |
| 333 | mp-2490    | GaP                  | 1 | 1 | 1 | 1 | 1 | 1 | 0 | 1 | 1 | 1 | 1 | 1 | 11          | 1.5928  |
| 334 | mp-36111   | LiMgP                | 1 | 1 | 0 | 1 | 1 | 1 | 1 | 1 | 1 | 1 | 1 | 1 | 11          | 1.5391  |
| 335 | mp-1479    | BP                   | 1 | 1 | 1 | 1 | 1 | 0 | 1 | 1 | 1 | 1 | 1 | 1 | 11          | 1.2435  |
| 336 | mp-2624    | AlSb                 | 1 | 1 | 1 | 1 | 1 | 1 | 1 | 1 | 1 | 0 | 1 | 1 | 11          | 1.2273  |
| 337 | mp-30847   | TiSnPt               | 1 | 1 | 1 | 1 | 1 | 1 | 0 | 1 | 1 | 1 | 1 | 1 | 11          | 0.7908  |
| 338 | mp-31454   | TaSbRu               | 1 | 1 | 1 | 1 | 1 | 1 | 0 | 1 | 1 | 1 | 1 | 1 | 11          | 0.6669  |
| 339 | mp-11836   | ErSbPd               | 1 | 1 | 1 | 1 | 1 | 1 | 0 | 1 | 1 | 1 | 1 | 1 | 11          | 0.2096  |
| 340 | mp-2114    | YN                   | 1 | 1 | 1 | 1 | 1 | 1 | 0 | 1 | 1 | 1 | 1 | 1 | 11          | 0.151   |
| 341 | mp-1008858 | NdBiPd               | 1 | 1 | 1 | 1 | 1 | 1 | 0 | 1 | 1 | 1 | 1 | 1 | 11          | 0.1051  |
| 342 | mp-13305   | SmSnAu               | 1 | 1 | 1 | 1 | 1 | 1 | 0 | 1 | 1 | 1 | 1 | 1 | 11          | 0.097   |
| 343 | mp-631550  | CaBiB                | 1 | 1 | 1 | 1 | 1 | 1 | 0 | 1 | 1 | 1 | 1 | 1 | 11          | 0.0821  |
| 344 | mp-961653  | FeSiW                | 1 | 1 | 1 | 1 | 1 | 1 | 0 | 1 | 1 | 1 | 1 | 1 | 11          | 0.065   |
| 345 | mp-1883    | SnTe                 | 1 | 1 | 1 | 1 | 1 | 1 | 0 | 1 | 1 | 1 | 1 | 1 | 11          | 0.0428  |
| 346 | mp-30390   | HoSnAu               | 1 | 1 | 1 | 1 | 1 | 1 | 0 | 1 | 1 | 1 | 1 | 1 | 11          | 0.0235  |
| 347 | mp-5640    | ErSnAu               | 1 | 1 | 1 | 1 | 1 | 1 | 0 | 1 | 1 | 1 | 1 | 1 | 11          | 0.0072  |
| 348 | mp-631466  | KSc <sub>2</sub> Co  | 1 | 1 | 0 | 1 | 1 | 1 | 1 | 1 | 1 | 1 | 1 | 1 | 11          | 0       |
| 349 | mp-1009459 | NbC                  | 1 | 1 | 1 | 1 | 1 | 1 | 0 | 1 | 1 | 1 | 1 | 1 | 11          | 0       |
| 350 | mp-971702  | YbNdCd <sub>2</sub>  | 1 | 1 | 0 | 1 | 1 | 1 | 1 | 1 | 1 | 1 | 1 | 1 | 11          | 0       |
| 351 | mp-124     | Ag                   | 1 | 1 | 1 | 1 | 1 | 1 | 0 | 1 | 1 | 1 | 1 | 1 | 11          | 0       |
| 352 | mp-1546    | DyMg <sub>3</sub>    | 1 | 1 | 0 | 1 | 1 | 1 | 1 | 1 | 1 | 1 | 1 | 1 | 11          | 0       |
| 353 | mp-10624   | USbRh                | 1 | 1 | 1 | 1 | 1 | 1 | 0 | 1 | 1 | 1 | 1 | 1 | 11          | 0       |
| 354 | mp-12599   | PrTl                 | 1 | 1 | 1 | 1 | 1 | 1 | 0 | 1 | 1 | 1 | 1 | 1 | 11          | 0       |
| 355 | mp-1502    | Al <sub>2</sub> Pt   | 1 | 1 | 1 | 1 | 1 | 1 | 0 | 1 | 1 | 1 | 1 | 1 | 11          | 0       |
| 356 | mp-1006884 | CoMo                 | 1 | 1 | 1 | 1 | 1 | 1 | 0 | 1 | 1 | 1 | 1 | 1 | 11          | 0       |
| 357 | mp-75      | Nb                   | 1 | 1 | 1 | 1 | 1 | 1 | 0 | 1 | 1 | 1 | 1 | 1 | 11          | 0       |
| 358 | mp-961721  | HfBiRh               | 1 | 1 | 1 | 1 | 1 | 1 | 0 | 1 | 1 | 1 | 1 | 1 | 11          | 0       |
| 359 | mp-961696  | MnCoSi               | 1 | 1 | 1 | 1 | 1 | 1 | 0 | 1 | 1 | 1 | 1 | 1 | 11          | 0       |
| 360 | mp-428     | PrMg <sub>3</sub>    | 1 | 1 | 0 | 1 | 1 | 1 | 1 | 1 | 1 | 1 | 1 | 1 | 11          | 0       |
| 361 | mp-1009878 | ZrC                  | 1 | 1 | 1 | 1 | 1 | 1 | 0 | 1 | 1 | 1 | 1 | 1 | 11          | 0       |
| 362 | mp-961694  | TiNiGe               | 1 | 1 | 1 | 1 | 1 | 1 | 0 | 1 | 1 | 1 | 1 | 1 | 11          | 0       |
| 363 | mp-22682   | In <sub>2</sub> Pt   | 1 | 1 | 1 | 1 | 1 | 1 | 0 | 1 | 1 | 1 | 1 | 1 | 11          | 0       |
| 364 | mp-4846    | MnSbRh               | 1 | 1 | 1 | 1 | 1 | 1 | 0 | 1 | 1 | 1 | 1 | 1 | 11          | 0       |
| 365 | mp-863705  | Pm <sub>2</sub> MgGa | 1 | 1 | 0 | 1 | 1 | 1 | 1 | 1 | 1 | 1 | 1 | 1 | 11          | 0       |
| 366 | mp-961690  | VGaNi                | 1 | 1 | 1 | 1 | 1 | 1 | 0 | 1 | 1 | 1 | 1 | 1 | 11          | 0       |
| 367 | mp-631353  | MnRePt               | 1 | 1 | 1 | 1 | 1 | 1 | 0 | 1 | 1 | 1 | 1 | 1 | 11          | 0       |

| No. | cif_id     | Crystal structure | A | B | C | D | E | F | G | H | I | J | K | L | Total match | Bandgap |
|-----|------------|-------------------|---|---|---|---|---|---|---|---|---|---|---|---|-------------|---------|
| 368 | mp-770     | DyCd              | 1 | 1 | 1 | 1 | 1 | 1 | 0 | 1 | 1 | 1 | 1 | 1 | 11          | 0       |
| 369 | mp-5549    | MgSnAu            | 1 | 1 | 1 | 1 | 1 | 1 | 0 | 1 | 1 | 1 | 1 | 1 | 11          | 0       |
| 370 | mp-30479   | Ca3Pb             | 1 | 1 | 0 | 1 | 1 | 1 | 1 | 1 | 1 | 1 | 1 | 1 | 11          | 0       |
| 371 | mp-961720  | ZrAsRh            | 1 | 1 | 1 | 1 | 1 | 1 | 0 | 1 | 1 | 1 | 1 | 1 | 11          | 0       |
| 372 | mp-1009494 | NpN               | 1 | 1 | 1 | 1 | 1 | 0 | 1 | 1 | 1 | 1 | 1 | 1 | 11          | 0       |
| 373 | mp-1453    | NdSe              | 1 | 1 | 1 | 1 | 1 | 1 | 0 | 1 | 1 | 1 | 1 | 1 | 11          | 0       |
| 374 | mp-11843   | DyAl              | 1 | 1 | 1 | 1 | 1 | 1 | 0 | 1 | 1 | 1 | 1 | 1 | 11          | 0       |
| 375 | mp-1018132 | AlBi              | 1 | 1 | 1 | 1 | 1 | 1 | 0 | 1 | 1 | 1 | 1 | 1 | 11          | 0       |
| 376 | mp-2050    | HoSb              | 1 | 1 | 1 | 1 | 1 | 1 | 0 | 1 | 1 | 1 | 1 | 1 | 11          | 0       |
| 377 | mp-23245   | ErBi              | 1 | 1 | 1 | 1 | 1 | 1 | 0 | 1 | 1 | 1 | 1 | 1 | 11          | 0       |
| 378 | mp-1406    | MnTe              | 1 | 1 | 1 | 1 | 1 | 1 | 0 | 1 | 1 | 1 | 1 | 1 | 11          | 0       |
| 379 | mp-961681  | ZrGePt            | 1 | 1 | 1 | 1 | 1 | 1 | 0 | 1 | 1 | 1 | 1 | 1 | 11          | 0       |
| 380 | mp-1008689 | Ti2Si             | 1 | 1 | 1 | 1 | 1 | 1 | 0 | 1 | 1 | 1 | 1 | 1 | 11          | 0       |
| 381 | mp-1001785 | MoP               | 1 | 1 | 1 | 1 | 1 | 1 | 0 | 1 | 1 | 1 | 1 | 1 | 11          | 0       |
| 382 | mp-631379  | ZnCuMo            | 1 | 1 | 1 | 1 | 1 | 1 | 0 | 1 | 1 | 1 | 1 | 1 | 11          | 0       |
| 383 | mp-31456   | HfSbRu            | 1 | 1 | 1 | 1 | 1 | 1 | 0 | 1 | 1 | 1 | 1 | 1 | 11          | 0       |
| 384 | mp-2316    | TmZn              | 1 | 1 | 1 | 1 | 1 | 1 | 0 | 1 | 1 | 1 | 1 | 1 | 11          | 0       |
| 385 | mp-961709  | ZrPtPb            | 1 | 1 | 1 | 1 | 1 | 1 | 0 | 1 | 1 | 1 | 1 | 1 | 11          | 0       |
| 386 | mp-867145  | LiHo2Ga           | 1 | 1 | 0 | 1 | 1 | 1 | 1 | 1 | 1 | 1 | 1 | 1 | 11          | 0       |
| 387 | mp-961702  | LaSbPt            | 1 | 1 | 1 | 1 | 1 | 1 | 0 | 1 | 1 | 1 | 1 | 1 | 11          | 0       |
| 388 | mp-436     | SmRh              | 1 | 1 | 1 | 1 | 1 | 1 | 0 | 1 | 1 | 1 | 1 | 1 | 11          | 0       |
| 389 | mp-30377   | ErPbAu            | 1 | 1 | 1 | 1 | 1 | 1 | 0 | 1 | 1 | 1 | 1 | 1 | 11          | 0       |
| 390 | mp-11516   | NbRu              | 1 | 1 | 1 | 1 | 1 | 1 | 0 | 1 | 1 | 1 | 1 | 1 | 11          | 0       |
| 391 | mp-1408    | MgHg              | 1 | 1 | 1 | 1 | 1 | 1 | 0 | 1 | 1 | 1 | 1 | 1 | 11          | 0       |
| 392 | mp-1013545 | Ca3BiAs           | 1 | 1 | 1 | 1 | 1 | 0 | 1 | 1 | 1 | 1 | 1 | 1 | 11          | 0       |
| 393 | mp-2563    | CeSe              | 1 | 1 | 1 | 1 | 1 | 1 | 0 | 1 | 1 | 1 | 1 | 1 | 11          | 0       |
| 394 | mp-1001834 | HfN               | 1 | 1 | 1 | 1 | 1 | 1 | 0 | 1 | 1 | 1 | 1 | 1 | 11          | 0       |
| 395 | mp-866180  | Li2YbPb           | 1 | 1 | 0 | 1 | 1 | 1 | 1 | 1 | 1 | 1 | 1 | 1 | 11          | 0       |
| 396 | mp-2210    | ZrCu              | 1 | 1 | 1 | 1 | 1 | 1 | 0 | 1 | 1 | 1 | 1 | 1 | 11          | 0       |
| 397 | mp-776     | LaCd              | 1 | 1 | 1 | 1 | 1 | 1 | 0 | 1 | 1 | 1 | 1 | 1 | 11          | 0       |
| 398 | mp-2163    | HoRh              | 1 | 1 | 1 | 1 | 1 | 1 | 0 | 1 | 1 | 1 | 1 | 1 | 11          | 0       |
| 399 | mp-1006883 | CoNi              | 1 | 1 | 1 | 1 | 1 | 1 | 0 | 1 | 1 | 1 | 1 | 1 | 11          | 0       |
| 400 | mp-979989  | Yb2AgPd           | 1 | 1 | 1 | 1 | 1 | 1 | 0 | 1 | 1 | 1 | 1 | 1 | 11          | 0       |
| 401 | mp-1009132 | HoBiPd            | 1 | 1 | 1 | 1 | 1 | 1 | 0 | 1 | 1 | 1 | 1 | 1 | 11          | 0       |
| 402 | mp-1002165 | GeC               | 1 | 1 | 1 | 1 | 1 | 1 | 0 | 1 | 1 | 1 | 1 | 1 | 11          | 0       |
| 403 | mp-631555  | MnVNi             | 1 | 1 | 1 | 1 | 1 | 1 | 0 | 1 | 1 | 1 | 1 | 1 | 11          | 0       |
| 404 | mp-170     | HoCd              | 1 | 1 | 1 | 1 | 1 | 1 | 0 | 1 | 1 | 1 | 1 | 1 | 11          | 0       |
| 405 | mp-1009731 | ReC               | 1 | 1 | 1 | 1 | 1 | 1 | 0 | 1 | 1 | 1 | 1 | 1 | 11          | 0       |
| 406 | mp-621592  | YPbAu             | 1 | 1 | 1 | 1 | 1 | 1 | 0 | 1 | 1 | 1 | 1 | 1 | 11          | 0       |
| 407 | mp-24096   | NdH2              | 1 | 1 | 1 | 1 | 1 | 1 | 0 | 1 | 1 | 1 | 1 | 1 | 11          | 0       |
| 408 | mp-12564   | LiSbAu            | 1 | 1 | 1 | 1 | 1 | 1 | 0 | 1 | 1 | 1 | 1 | 1 | 11          | 0       |
| 409 | mp-1925    | ZrS               | 1 | 1 | 1 | 1 | 1 | 1 | 0 | 1 | 1 | 1 | 1 | 1 | 11          | 0       |
| 410 | mp-865579  | Li2ErIn           | 1 | 1 | 0 | 1 | 1 | 1 | 1 | 1 | 1 | 1 | 1 | 1 | 11          | 0       |
| 411 | mp-29242   | Ba3PbO            | 1 | 1 | 1 | 1 | 1 | 1 | 0 | 1 | 1 | 1 | 1 | 1 | 11          | 0       |

| No. | cif_id     | Crystal structure | A | B | C | D | E | F | G | H | I | J | K | L | Total match | Bandgap |
|-----|------------|-------------------|---|---|---|---|---|---|---|---|---|---|---|---|-------------|---------|
| 412 | mp-510403  | GdSb              | 1 | 1 | 1 | 1 | 1 | 1 | 0 | 1 | 1 | 1 | 1 | 1 | 11          | 0       |
| 413 | mp-542065  | CdAgSb            | 1 | 1 | 1 | 1 | 1 | 1 | 0 | 1 | 1 | 1 | 1 | 1 | 11          | 0       |
| 414 | mp-1738    | SmAs              | 1 | 1 | 1 | 1 | 1 | 1 | 0 | 1 | 1 | 1 | 1 | 1 | 11          | 0       |
| 415 | mp-11471   | ScHg              | 1 | 1 | 1 | 1 | 1 | 1 | 0 | 1 | 1 | 1 | 1 | 1 | 11          | 0       |
| 416 | mp-834     | ThN               | 1 | 1 | 1 | 1 | 1 | 1 | 0 | 1 | 1 | 1 | 1 | 1 | 11          | 0       |
| 417 | mp-961679  | TaAlPt            | 1 | 1 | 1 | 1 | 1 | 1 | 0 | 1 | 1 | 1 | 1 | 1 | 11          | 0       |
| 418 | mp-721     | TbCd              | 1 | 1 | 1 | 1 | 1 | 1 | 0 | 1 | 1 | 1 | 1 | 1 | 11          | 0       |
| 419 | mp-1176    | TbTe              | 1 | 1 | 1 | 1 | 1 | 1 | 0 | 1 | 1 | 1 | 1 | 1 | 11          | 0       |
| 420 | mp-1018029 | CuPd              | 1 | 1 | 1 | 1 | 1 | 1 | 0 | 1 | 1 | 1 | 1 | 1 | 11          | 0       |
| 421 | mp-232     | DyRh              | 1 | 1 | 1 | 1 | 1 | 1 | 0 | 1 | 1 | 1 | 1 | 1 | 11          | 0       |
| 422 | mp-13308   | HoGeAu            | 1 | 1 | 1 | 1 | 1 | 1 | 0 | 1 | 1 | 1 | 1 | 1 | 11          | 0       |
| 423 | mp-631371  | TiCuIr            | 1 | 1 | 1 | 1 | 1 | 1 | 0 | 1 | 1 | 1 | 1 | 1 | 11          | 0       |
| 424 | mp-1164    | ThC               | 1 | 1 | 1 | 1 | 1 | 1 | 0 | 1 | 1 | 1 | 1 | 1 | 11          | 0       |
| 425 | mp-961710  | VSiPt             | 1 | 1 | 1 | 1 | 1 | 1 | 0 | 1 | 1 | 1 | 1 | 1 | 11          | 0       |
| 426 | mp-1059    | NdCd              | 1 | 1 | 1 | 1 | 1 | 1 | 0 | 1 | 1 | 1 | 1 | 1 | 11          | 0       |
| 427 | mp-22907   | DyBi              | 1 | 1 | 1 | 1 | 1 | 1 | 0 | 1 | 1 | 1 | 1 | 1 | 11          | 0       |
| 428 | mp-2052    | ScAs              | 1 | 1 | 1 | 1 | 1 | 1 | 0 | 1 | 1 | 1 | 1 | 1 | 11          | 0       |
| 429 | mp-568398  | CaBiAu            | 1 | 1 | 1 | 1 | 1 | 1 | 0 | 1 | 1 | 1 | 1 | 1 | 11          | 0       |
| 430 | mp-865882  | Li2SmIn           | 1 | 1 | 0 | 1 | 1 | 1 | 1 | 1 | 1 | 1 | 1 | 1 | 11          | 0       |
| 431 | mp-631405  | ZrTcCl            | 1 | 1 | 1 | 1 | 1 | 1 | 0 | 1 | 1 | 1 | 1 | 1 | 11          | 0       |
| 432 | mp-20952   | TiNiSb            | 1 | 1 | 1 | 1 | 1 | 1 | 0 | 1 | 1 | 1 | 1 | 1 | 11          | 0       |
| 433 | mp-631754  | ReSnGe            | 1 | 1 | 1 | 1 | 1 | 1 | 0 | 1 | 1 | 1 | 1 | 1 | 11          | 0       |
| 434 | mp-1031    | GdCd              | 1 | 1 | 1 | 1 | 1 | 1 | 0 | 1 | 1 | 1 | 1 | 1 | 11          | 0       |
| 435 | mp-2014    | DyP               | 1 | 1 | 1 | 1 | 1 | 1 | 0 | 1 | 1 | 1 | 1 | 1 | 11          | 0       |
| 436 | mp-631294  | HfMoSe            | 1 | 1 | 1 | 1 | 1 | 1 | 0 | 1 | 1 | 1 | 1 | 1 | 11          | 0       |
| 437 | mp-30413   | TbPbAu            | 1 | 1 | 1 | 1 | 1 | 1 | 0 | 1 | 1 | 1 | 1 | 1 | 11          | 0       |
| 438 | mp-30466   | YbBiPd            | 1 | 1 | 1 | 1 | 1 | 1 | 0 | 1 | 1 | 1 | 1 | 1 | 11          | 0       |
| 439 | mp-568931  | YbNiSb            | 1 | 1 | 1 | 1 | 1 | 1 | 0 | 1 | 1 | 1 | 1 | 1 | 11          | 0       |
| 440 | mp-1009822 | SnC               | 1 | 1 | 1 | 1 | 1 | 1 | 0 | 1 | 1 | 1 | 1 | 1 | 11          | 0       |
| 441 | mp-2444    | GaRh              | 1 | 1 | 1 | 1 | 1 | 1 | 0 | 1 | 1 | 1 | 1 | 1 | 11          | 0       |
| 442 | mp-1008702 | Ti2In             | 1 | 1 | 1 | 1 | 1 | 1 | 0 | 1 | 1 | 1 | 1 | 1 | 11          | 0       |
| 443 | mp-979073  | TmMg2Sc           | 1 | 1 | 0 | 1 | 1 | 1 | 1 | 1 | 1 | 1 | 1 | 1 | 11          | 0       |
| 444 | mp-978528  | SmMg2Sc           | 1 | 1 | 0 | 1 | 1 | 1 | 1 | 1 | 1 | 1 | 1 | 1 | 11          | 0       |
| 445 | mp-998890  | Cu                | 1 | 1 | 1 | 1 | 1 | 1 | 0 | 1 | 1 | 1 | 1 | 1 | 11          | 0       |
| 446 | mp-22866   | HoBi              | 1 | 1 | 1 | 1 | 1 | 1 | 0 | 1 | 1 | 1 | 1 | 1 | 11          | 0       |
| 447 | mp-915     | YCd               | 1 | 1 | 1 | 1 | 1 | 1 | 0 | 1 | 1 | 1 | 1 | 1 | 11          | 0       |
| 448 | mp-2443    | DyHg              | 1 | 1 | 1 | 1 | 1 | 1 | 0 | 1 | 1 | 1 | 1 | 1 | 11          | 0       |
| 449 | mp-13      | Fe                | 1 | 1 | 1 | 1 | 1 | 1 | 0 | 1 | 1 | 1 | 1 | 1 | 11          | 0       |
| 450 | mp-631320  | TcIrOs            | 1 | 1 | 1 | 1 | 1 | 1 | 0 | 1 | 1 | 1 | 1 | 1 | 11          | 0       |
| 451 | mp-24092   | GdH2              | 1 | 1 | 1 | 1 | 1 | 1 | 0 | 1 | 1 | 1 | 1 | 1 | 11          | 0       |
| 452 | mp-933     | YAs               | 1 | 1 | 1 | 1 | 1 | 1 | 0 | 1 | 1 | 1 | 1 | 1 | 11          | 0       |
| 453 | mp-574283  | GdTe              | 1 | 1 | 1 | 1 | 1 | 1 | 0 | 1 | 1 | 1 | 1 | 1 | 11          | 0       |
| 454 | mp-2082    | Plr2              | 1 | 1 | 1 | 1 | 1 | 1 | 0 | 1 | 1 | 1 | 1 | 1 | 11          | 0       |
| 455 | mp-1013733 | Ca3BiSb           | 1 | 1 | 1 | 1 | 1 | 0 | 1 | 1 | 1 | 1 | 1 | 1 | 11          | 0       |

| No. | cif_id     | Crystal structure | A | B | C | D | E | F | G | H | I | J | K | L | Total match | Bandgap |
|-----|------------|-------------------|---|---|---|---|---|---|---|---|---|---|---|---|-------------|---------|
| 456 | mp-11242   | DyPbAu            | 1 | 1 | 1 | 1 | 1 | 1 | 0 | 1 | 1 | 1 | 1 | 1 | 11          | 0       |
| 457 | mp-10755   | TiFeSb            | 1 | 1 | 1 | 1 | 1 | 1 | 0 | 1 | 1 | 1 | 1 | 1 | 11          | 0       |
| 458 | mp-24727   | TmH2              | 1 | 1 | 1 | 1 | 1 | 1 | 0 | 1 | 1 | 1 | 1 | 1 | 11          | 0       |
| 459 | mp-961716  | VSnPt             | 1 | 1 | 1 | 1 | 1 | 1 | 0 | 1 | 1 | 1 | 1 | 1 | 11          | 0       |
| 460 | mp-510374  | GdAs              | 1 | 1 | 1 | 1 | 1 | 1 | 0 | 1 | 1 | 1 | 1 | 1 | 11          | 0       |
| 461 | mp-11286   | CaHg              | 1 | 1 | 1 | 1 | 1 | 1 | 0 | 1 | 1 | 1 | 1 | 1 | 11          | 0       |
| 462 | mp-1018162 | CeBiPt            | 1 | 1 | 1 | 1 | 1 | 1 | 0 | 1 | 1 | 1 | 1 | 1 | 11          | 0       |
| 463 | mp-631366  | TcSnSe            | 1 | 1 | 1 | 1 | 1 | 0 | 1 | 1 | 1 | 1 | 1 | 1 | 11          | 0       |
| 464 | mp-910     | NbC               | 1 | 1 | 1 | 1 | 1 | 1 | 0 | 1 | 1 | 1 | 1 | 1 | 11          | 0       |
| 465 | mp-865661  | YbMgCd2           | 1 | 1 | 0 | 1 | 1 | 1 | 1 | 1 | 1 | 1 | 1 | 1 | 11          | 0       |
| 466 | mp-961666  | MnNbAs            | 1 | 1 | 1 | 1 | 1 | 1 | 0 | 1 | 1 | 1 | 1 | 1 | 11          | 0       |
| 467 | mp-5318    | MnCoSb            | 1 | 1 | 1 | 1 | 1 | 1 | 0 | 1 | 1 | 1 | 1 | 1 | 11          | 0       |
| 468 | mp-568466  | LiInSn            | 1 | 1 | 1 | 1 | 1 | 1 | 0 | 1 | 1 | 1 | 1 | 1 | 11          | 0       |
| 469 | mp-20263   | CaIn              | 1 | 1 | 1 | 1 | 1 | 1 | 0 | 1 | 1 | 1 | 1 | 1 | 11          | 0       |
| 470 | mp-1092    | HoHg              | 1 | 1 | 1 | 1 | 1 | 1 | 0 | 1 | 1 | 1 | 1 | 1 | 11          | 0       |
| 471 | mp-862681  | ErMg3             | 1 | 1 | 0 | 1 | 1 | 1 | 1 | 1 | 1 | 1 | 1 | 1 | 11          | 0       |
| 472 | mp-1008631 | VCoTe             | 1 | 1 | 1 | 1 | 1 | 1 | 0 | 1 | 1 | 1 | 1 | 1 | 11          | 0       |
| 473 | mp-961658  | VFeSe             | 1 | 1 | 1 | 1 | 1 | 1 | 0 | 1 | 1 | 1 | 1 | 1 | 11          | 0       |
| 474 | mp-978273  | Mg3Cd             | 1 | 1 | 0 | 1 | 1 | 1 | 1 | 1 | 1 | 1 | 1 | 1 | 11          | 0       |
| 475 | mp-631497  | BeInBi            | 1 | 1 | 1 | 1 | 1 | 1 | 0 | 1 | 1 | 1 | 1 | 1 | 11          | 0       |
| 476 | mp-11256   | ScAu              | 1 | 1 | 1 | 1 | 1 | 1 | 0 | 1 | 1 | 1 | 1 | 1 | 11          | 0       |
| 477 | mp-631288  | LaGeOs            | 1 | 1 | 1 | 1 | 1 | 1 | 0 | 1 | 1 | 1 | 1 | 1 | 11          | 0       |
| 478 | mp-572     | SmCd              | 1 | 1 | 1 | 1 | 1 | 1 | 0 | 1 | 1 | 1 | 1 | 1 | 11          | 0       |
| 479 | mp-20415   | GdPbAu            | 1 | 1 | 1 | 1 | 1 | 1 | 0 | 1 | 1 | 1 | 1 | 1 | 11          | 0       |
| 480 | mp-2795    | ZrC               | 1 | 1 | 1 | 1 | 1 | 1 | 0 | 1 | 1 | 1 | 1 | 1 | 11          | 0       |
| 481 | mp-2637    | YSe               | 1 | 1 | 1 | 1 | 1 | 1 | 0 | 1 | 1 | 1 | 1 | 1 | 11          | 0       |
| 482 | mp-1007    | DySb              | 1 | 1 | 1 | 1 | 1 | 1 | 0 | 1 | 1 | 1 | 1 | 1 | 11          | 0       |
| 483 | mp-102     | Co                | 1 | 1 | 1 | 1 | 1 | 1 | 0 | 1 | 1 | 1 | 1 | 1 | 11          | 0       |
| 484 | mp-11255   | PrAu              | 1 | 1 | 1 | 1 | 1 | 1 | 0 | 1 | 1 | 1 | 1 | 1 | 11          | 0       |
| 485 | mp-22921   | TbBi              | 1 | 1 | 1 | 1 | 1 | 1 | 0 | 1 | 1 | 1 | 1 | 1 | 11          | 0       |
| 486 | mp-2781    | ScPd              | 1 | 1 | 1 | 1 | 1 | 1 | 0 | 1 | 1 | 1 | 1 | 1 | 11          | 0       |
| 487 | mp-961719  | HfAsRh            | 1 | 1 | 1 | 1 | 1 | 1 | 0 | 1 | 1 | 1 | 1 | 1 | 11          | 0       |
| 488 | mp-631526  | SiBPb             | 1 | 1 | 1 | 1 | 1 | 1 | 0 | 1 | 1 | 1 | 1 | 1 | 11          | 0       |
| 489 | mp-1006150 | Eu3Re             | 1 | 1 | 0 | 1 | 1 | 1 | 1 | 1 | 1 | 1 | 1 | 1 | 11          | 0       |
| 490 | mp-129     | Mo                | 1 | 1 | 1 | 1 | 1 | 1 | 0 | 1 | 1 | 1 | 1 | 1 | 11          | 0       |
| 491 | mp-2602    | NdAs              | 1 | 1 | 1 | 1 | 1 | 1 | 0 | 1 | 1 | 1 | 1 | 1 | 11          | 0       |
| 492 | mp-23241   | YBi               | 1 | 1 | 1 | 1 | 1 | 1 | 0 | 1 | 1 | 1 | 1 | 1 | 11          | 0       |
| 493 | mp-24147   | AcH2              | 1 | 1 | 1 | 1 | 1 | 1 | 0 | 1 | 1 | 1 | 1 | 1 | 11          | 0       |
| 494 | mp-2281    | SmSb              | 1 | 1 | 1 | 1 | 1 | 1 | 0 | 1 | 1 | 1 | 1 | 1 | 11          | 0       |
| 495 | mp-2642    | CdAg              | 1 | 1 | 1 | 1 | 1 | 1 | 0 | 1 | 1 | 1 | 1 | 1 | 11          | 0       |
| 496 | mp-1008928 | EuSe              | 1 | 1 | 1 | 1 | 1 | 1 | 0 | 1 | 1 | 1 | 1 | 1 | 11          | 0       |
| 497 | mp-1902    | MnPd              | 1 | 1 | 1 | 1 | 1 | 1 | 0 | 1 | 1 | 1 | 1 | 1 | 11          | 0       |
| 498 | mp-571405  | NdTi              | 1 | 1 | 1 | 1 | 1 | 1 | 0 | 1 | 1 | 1 | 1 | 1 | 11          | 0       |
| 499 | mp-191     | YRh               | 1 | 1 | 1 | 1 | 1 | 1 | 0 | 1 | 1 | 1 | 1 | 1 | 11          | 0       |

| No. | cif_id     | Crystal structure | A | B | C | D | E | F | G | H | I | J | K | L | Total match | Bandgap |
|-----|------------|-------------------|---|---|---|---|---|---|---|---|---|---|---|---|-------------|---------|
| 500 | mp-21005   | GdIn              | 1 | 1 | 1 | 1 | 1 | 1 | 0 | 1 | 1 | 1 | 1 | 1 | 11          | 0       |
| 501 | mp-510401  | GdP               | 1 | 1 | 1 | 1 | 1 | 1 | 0 | 1 | 1 | 1 | 1 | 1 | 11          | 0       |
| 502 | mp-133     | Sb                | 1 | 1 | 1 | 1 | 1 | 1 | 0 | 1 | 1 | 1 | 1 | 1 | 11          | 0       |
| 503 | mp-1008734 | ThH2              | 1 | 1 | 1 | 1 | 1 | 1 | 0 | 1 | 1 | 1 | 1 | 1 | 11          | 0       |
| 504 | mp-1623    | ErS               | 1 | 1 | 1 | 1 | 1 | 1 | 0 | 1 | 1 | 1 | 1 | 1 | 11          | 0       |
| 505 | mp-30      | Cu                | 1 | 1 | 1 | 1 | 1 | 1 | 0 | 1 | 1 | 1 | 1 | 1 | 11          | 0       |
| 506 | mp-2399    | YHg               | 1 | 1 | 1 | 1 | 1 | 1 | 0 | 1 | 1 | 1 | 1 | 1 | 11          | 0       |
| 507 | mp-12594   | TiIr              | 1 | 1 | 1 | 1 | 1 | 1 | 0 | 1 | 1 | 1 | 1 | 1 | 11          | 0       |
| 508 | mp-377     | LuRh              | 1 | 1 | 1 | 1 | 1 | 1 | 0 | 1 | 1 | 1 | 1 | 1 | 11          | 0       |
| 509 | mp-1009582 | NiC               | 1 | 1 | 1 | 1 | 1 | 1 | 0 | 1 | 1 | 1 | 1 | 1 | 11          | 0       |
| 510 | mp-1009222 | MnTe              | 1 | 1 | 1 | 1 | 1 | 1 | 0 | 1 | 1 | 1 | 1 | 1 | 11          | 0       |
| 511 | mp-865580  | Li2DyIn           | 1 | 1 | 0 | 1 | 1 | 1 | 1 | 1 | 1 | 1 | 1 | 1 | 11          | 0       |
| 512 | mp-24151   | DyH2              | 1 | 1 | 1 | 1 | 1 | 1 | 0 | 1 | 1 | 1 | 1 | 1 | 11          | 0       |
| 513 | mp-24288   | LuH2              | 1 | 1 | 1 | 1 | 1 | 1 | 0 | 1 | 1 | 1 | 1 | 1 | 11          | 0       |
| 514 | mp-1008650 | CeSe              | 1 | 1 | 1 | 1 | 1 | 1 | 0 | 1 | 1 | 1 | 1 | 1 | 11          | 0       |
| 515 | mp-961677  | TaGaPt            | 1 | 1 | 1 | 1 | 1 | 1 | 0 | 1 | 1 | 1 | 1 | 1 | 11          | 0       |
| 516 | mp-20298   | SmIn              | 1 | 1 | 1 | 1 | 1 | 1 | 0 | 1 | 1 | 1 | 1 | 1 | 11          | 0       |
| 517 | mp-631464  | KBePt             | 1 | 0 | 1 | 1 | 1 | 1 | 1 | 1 | 1 | 1 | 1 | 1 | 11          | 0       |
| 518 | mp-867     | ErCd              | 1 | 1 | 1 | 1 | 1 | 1 | 0 | 1 | 1 | 1 | 1 | 1 | 11          | 0       |
| 519 | mp-20012   | InSb              | 1 | 1 | 1 | 1 | 1 | 1 | 1 | 1 | 0 | 1 | 1 | 1 | 11          | 0       |
| 520 | mp-542583  | EuTe              | 1 | 1 | 1 | 1 | 1 | 1 | 0 | 1 | 1 | 1 | 1 | 1 | 11          | 0       |
| 521 | mp-1009543 | DyBiPd            | 1 | 1 | 1 | 1 | 1 | 1 | 0 | 1 | 1 | 1 | 1 | 1 | 11          | 0       |
| 522 | mp-1787    | NdMg3             | 1 | 1 | 0 | 1 | 1 | 1 | 1 | 1 | 1 | 1 | 1 | 1 | 11          | 0       |
| 523 | mp-11561   | TbRh              | 1 | 1 | 1 | 1 | 1 | 1 | 0 | 1 | 1 | 1 | 1 | 1 | 11          | 0       |
| 524 | mp-1008624 | YBiPd             | 1 | 1 | 1 | 1 | 1 | 1 | 0 | 1 | 1 | 1 | 1 | 1 | 11          | 0       |
| 525 | mp-15694   | PaAs              | 1 | 1 | 1 | 1 | 1 | 1 | 0 | 1 | 1 | 1 | 1 | 1 | 11          | 0       |
| 526 | mp-506     | MgPd              | 1 | 1 | 1 | 1 | 1 | 1 | 0 | 1 | 1 | 1 | 1 | 1 | 11          | 0       |
| 527 | mp-11495   | LuRu              | 1 | 1 | 1 | 1 | 1 | 1 | 0 | 1 | 1 | 1 | 1 | 1 | 11          | 0       |
| 528 | mp-631538  | NiBiB             | 1 | 1 | 1 | 1 | 1 | 1 | 0 | 1 | 1 | 1 | 1 | 1 | 11          | 0       |
| 529 | mp-601     | PrP               | 1 | 1 | 1 | 1 | 1 | 1 | 0 | 1 | 1 | 1 | 1 | 1 | 11          | 0       |
| 530 | mp-1018119 | VCoSn             | 1 | 1 | 1 | 1 | 1 | 1 | 0 | 1 | 1 | 1 | 1 | 1 | 11          | 0       |
| 531 | mp-12674   | MnAu              | 1 | 1 | 1 | 1 | 1 | 1 | 0 | 1 | 1 | 1 | 1 | 1 | 11          | 0       |
| 532 | mp-981545  | Ho3Zr             | 1 | 1 | 0 | 1 | 1 | 1 | 1 | 1 | 1 | 1 | 1 | 1 | 11          | 0       |
| 533 | mp-631254  | KMnRu             | 1 | 0 | 1 | 1 | 1 | 1 | 1 | 1 | 1 | 1 | 1 | 1 | 11          | 0       |
| 534 | mp-984713  | Dy3Ga             | 1 | 1 | 0 | 1 | 1 | 1 | 1 | 1 | 1 | 1 | 1 | 1 | 11          | 0       |
| 535 | mp-2090    | FeCo              | 1 | 1 | 1 | 1 | 1 | 1 | 0 | 1 | 1 | 1 | 1 | 1 | 11          | 0       |
| 536 | mp-866196  | Li2PrIn           | 1 | 1 | 0 | 1 | 1 | 1 | 1 | 1 | 1 | 1 | 1 | 1 | 11          | 0       |
| 537 | mp-866199  | AcAg              | 1 | 1 | 1 | 1 | 1 | 1 | 0 | 1 | 1 | 1 | 1 | 1 | 11          | 0       |
| 538 | mp-961718  | TiAsRh            | 1 | 1 | 1 | 1 | 1 | 1 | 0 | 1 | 1 | 1 | 1 | 1 | 11          | 0       |
| 539 | mp-2520    | TmSb              | 1 | 1 | 1 | 1 | 1 | 1 | 0 | 1 | 1 | 1 | 1 | 1 | 11          | 0       |
| 540 | mp-631421  | CrGaTe            | 1 | 1 | 1 | 1 | 1 | 1 | 0 | 1 | 1 | 1 | 1 | 1 | 11          | 0       |
| 541 | mp-11374   | DyTl              | 1 | 1 | 1 | 1 | 1 | 1 | 0 | 1 | 1 | 1 | 1 | 1 | 11          | 0       |
| 542 | mp-631561  | ZrAgMo            | 1 | 1 | 1 | 1 | 1 | 1 | 0 | 1 | 1 | 1 | 1 | 1 | 11          | 0       |
| 543 | mp-2350    | LaS               | 1 | 1 | 1 | 1 | 1 | 1 | 0 | 1 | 1 | 1 | 1 | 1 | 11          | 0       |



| No. | cif_id     | Crystal structure | A | B | C | D | E | F | G | H | I | J | K | L | Total match | Bandgap |
|-----|------------|-------------------|---|---|---|---|---|---|---|---|---|---|---|---|-------------|---------|
| 544 | mp-862930  | Li2PmIn           | 1 | 1 | 0 | 1 | 1 | 1 | 1 | 1 | 1 | 1 | 1 | 1 | 11          | 0       |
| 545 | mp-331     | ScAl              | 1 | 1 | 1 | 1 | 1 | 1 | 0 | 1 | 1 | 1 | 1 | 1 | 11          | 0       |
| 546 | mp-8640    | Hf                | 1 | 1 | 1 | 1 | 1 | 1 | 0 | 1 | 1 | 1 | 1 | 1 | 11          | 0       |
| 547 | mp-2191    | ErSb              | 1 | 1 | 1 | 1 | 1 | 1 | 0 | 1 | 1 | 1 | 1 | 1 | 11          | 0       |
| 548 | mp-1093    | ThGe              | 1 | 1 | 1 | 1 | 1 | 1 | 0 | 1 | 1 | 1 | 1 | 1 | 11          | 0       |
| 549 | mp-2627    | DyAs              | 1 | 1 | 1 | 1 | 1 | 1 | 0 | 1 | 1 | 1 | 1 | 1 | 11          | 0       |
| 550 | mp-24658   | SmH2              | 1 | 1 | 1 | 1 | 1 | 1 | 0 | 1 | 1 | 1 | 1 | 1 | 11          | 0       |
| 551 | mp-117     | Sn                | 1 | 1 | 1 | 1 | 1 | 1 | 1 | 1 | 1 | 0 | 1 | 1 | 11          | 0       |
| 552 | mp-646     | PrCd              | 1 | 1 | 1 | 1 | 1 | 1 | 0 | 1 | 1 | 1 | 1 | 1 | 11          | 0       |
| 553 | mp-2381    | ErRh              | 1 | 1 | 1 | 1 | 1 | 1 | 0 | 1 | 1 | 1 | 1 | 1 | 11          | 0       |
| 554 | mp-10622   | PrAs              | 1 | 1 | 1 | 1 | 1 | 1 | 0 | 1 | 1 | 1 | 1 | 1 | 11          | 0       |
| 555 | mp-492     | TiN               | 1 | 1 | 1 | 1 | 1 | 1 | 0 | 1 | 1 | 1 | 1 | 1 | 11          | 0       |
| 556 | mp-20997   | InNi              | 1 | 1 | 1 | 1 | 1 | 1 | 0 | 1 | 1 | 1 | 1 | 1 | 11          | 0       |
| 557 | mp-2065    | MnS               | 1 | 1 | 1 | 1 | 1 | 1 | 0 | 1 | 1 | 1 | 1 | 1 | 11          | 0       |
| 558 | mp-979950  | AcYbMg2           | 1 | 1 | 0 | 1 | 1 | 1 | 1 | 1 | 1 | 1 | 1 | 1 | 11          | 0       |
| 559 | mp-542569  | AlRu              | 1 | 1 | 1 | 1 | 1 | 1 | 0 | 1 | 1 | 1 | 1 | 1 | 11          | 0       |
| 560 | mp-1008642 | UC2               | 1 | 1 | 1 | 1 | 1 | 1 | 0 | 1 | 1 | 1 | 1 | 1 | 11          | 0       |
| 561 | mp-30389   | HoPbAu            | 1 | 1 | 1 | 1 | 1 | 1 | 0 | 1 | 1 | 1 | 1 | 1 | 11          | 0       |
| 562 | mp-875     | AlOs              | 1 | 1 | 1 | 1 | 1 | 1 | 0 | 1 | 1 | 1 | 1 | 1 | 11          | 0       |
| 563 | mp-1534    | YS                | 1 | 1 | 1 | 1 | 1 | 1 | 0 | 1 | 1 | 1 | 1 | 1 | 11          | 0       |
| 564 | mp-6933    | MnN               | 1 | 1 | 1 | 1 | 1 | 1 | 0 | 1 | 1 | 1 | 1 | 1 | 11          | 0       |
| 565 | mp-1002206 | SiC               | 1 | 1 | 1 | 1 | 1 | 1 | 0 | 1 | 1 | 1 | 1 | 1 | 11          | 0       |
| 566 | mp-631302  | ScVFe             | 1 | 1 | 1 | 1 | 1 | 1 | 0 | 1 | 1 | 1 | 1 | 1 | 11          | 0       |
| 567 | mp-2212    | ScCo              | 1 | 1 | 1 | 1 | 1 | 1 | 0 | 1 | 1 | 1 | 1 | 1 | 11          | 0       |
| 568 | mp-24154   | NbH2              | 1 | 1 | 1 | 1 | 1 | 1 | 0 | 1 | 1 | 1 | 1 | 1 | 11          | 0       |
| 569 | mp-866181  | Li2NdIn           | 1 | 1 | 0 | 1 | 1 | 1 | 1 | 1 | 1 | 1 | 1 | 1 | 11          | 0       |
| 570 | mp-23234   | TmBi              | 1 | 1 | 1 | 1 | 1 | 1 | 0 | 1 | 1 | 1 | 1 | 1 | 11          | 0       |
| 571 | mp-1009128 | MnN               | 1 | 1 | 1 | 1 | 1 | 1 | 0 | 1 | 1 | 1 | 1 | 1 | 11          | 0       |
| 572 | mp-11621   | ZnNiSb            | 1 | 1 | 1 | 1 | 1 | 1 | 0 | 1 | 1 | 1 | 1 | 1 | 11          | 0       |
| 573 | mp-364     | AlRh              | 1 | 1 | 1 | 1 | 1 | 1 | 0 | 1 | 1 | 1 | 1 | 1 | 11          | 0       |
| 574 | mp-13496   | ZrPd              | 1 | 1 | 1 | 1 | 1 | 1 | 0 | 1 | 1 | 1 | 1 | 1 | 11          | 0       |
| 575 | mp-570632  | ScBi              | 1 | 1 | 1 | 1 | 1 | 1 | 0 | 1 | 1 | 1 | 1 | 1 | 11          | 0       |
| 576 | mp-1169    | ScCu              | 1 | 1 | 1 | 1 | 1 | 1 | 0 | 1 | 1 | 1 | 1 | 1 | 11          | 0       |
| 577 | mp-645     | TbP               | 1 | 1 | 1 | 1 | 1 | 1 | 0 | 1 | 1 | 1 | 1 | 1 | 11          | 0       |
| 578 | mp-570     | NdTe              | 1 | 1 | 1 | 1 | 1 | 1 | 0 | 1 | 1 | 1 | 1 | 1 | 11          | 0       |
| 579 | mp-631364  | TaOsPb            | 1 | 1 | 1 | 1 | 1 | 1 | 0 | 1 | 1 | 1 | 1 | 1 | 11          | 0       |
| 580 | mp-5676    | MnSbPt            | 1 | 1 | 1 | 1 | 1 | 1 | 0 | 1 | 1 | 1 | 1 | 1 | 11          | 0       |
| 581 | mp-1941    | GaNi              | 1 | 1 | 1 | 1 | 1 | 1 | 0 | 1 | 1 | 1 | 1 | 1 | 11          | 0       |
| 582 | mp-215     | YSb               | 1 | 1 | 1 | 1 | 1 | 1 | 0 | 1 | 1 | 1 | 1 | 1 | 11          | 0       |
| 583 | mp-631572  | GaReAs            | 1 | 1 | 1 | 1 | 1 | 1 | 0 | 1 | 1 | 1 | 1 | 1 | 11          | 0       |
| 584 | mp-11564   | TmRh              | 1 | 1 | 1 | 1 | 1 | 1 | 0 | 1 | 1 | 1 | 1 | 1 | 11          | 0       |
| 585 | mp-977386  | LiLu2Tc           | 1 | 1 | 0 | 1 | 1 | 1 | 1 | 1 | 1 | 1 | 1 | 1 | 11          | 0       |
| 586 | mp-1008903 | MgAgSb            | 1 | 1 | 1 | 1 | 1 | 1 | 0 | 1 | 1 | 1 | 1 | 1 | 11          | 0       |
| 587 | mp-2379    | CoSi2             | 1 | 1 | 1 | 1 | 1 | 1 | 0 | 1 | 1 | 1 | 1 | 1 | 11          | 0       |

| No. | cif_id     | Crystal structure | A | B | C | D | E | F | G | H | I | J | K | L | Total match | Bandgap |
|-----|------------|-------------------|---|---|---|---|---|---|---|---|---|---|---|---|-------------|---------|
| 588 | mp-631342  | MnTcPd            | 1 | 1 | 1 | 1 | 1 | 1 | 0 | 1 | 1 | 1 | 1 | 1 | 11          | 0       |
| 589 | mp-30848   | USnPt             | 1 | 1 | 1 | 1 | 1 | 1 | 0 | 1 | 1 | 1 | 1 | 1 | 11          | 0       |
| 590 | mp-515     | TmTl              | 1 | 1 | 1 | 1 | 1 | 1 | 0 | 1 | 1 | 1 | 1 | 1 | 11          | 0       |
| 591 | mp-2828    | HfN               | 1 | 1 | 1 | 1 | 1 | 1 | 0 | 1 | 1 | 1 | 1 | 1 | 11          | 0       |
| 592 | mp-994     | YP                | 1 | 1 | 1 | 1 | 1 | 1 | 0 | 1 | 1 | 1 | 1 | 1 | 11          | 0       |
| 593 | mp-961684  | LiCaAs            | 1 | 1 | 1 | 1 | 1 | 1 | 0 | 1 | 1 | 0 | 1 | 1 | 10          | 1.8116  |
| 594 | mp-961648  | KBaP              | 1 | 1 | 1 | 1 | 1 | 1 | 0 | 1 | 1 | 0 | 1 | 1 | 10          | 1.1622  |
| 595 | mp-5967    | TiCoSb            | 1 | 1 | 1 | 1 | 1 | 1 | 0 | 1 | 1 | 0 | 1 | 1 | 10          | 1.052   |
| 596 | mp-961713  | ZrSnPt            | 1 | 1 | 1 | 1 | 1 | 1 | 0 | 1 | 1 | 0 | 1 | 1 | 10          | 0.9628  |
| 597 | mp-961678  | ScCoTe            | 1 | 1 | 1 | 1 | 1 | 1 | 0 | 1 | 1 | 0 | 1 | 1 | 10          | 0.8678  |
| 598 | mp-962072  | KYSn              | 1 | 0 | 0 | 1 | 1 | 1 | 1 | 1 | 1 | 1 | 1 | 1 | 10          | 0.7193  |
| 599 | mp-1009733 | Ca2Si             | 1 | 0 | 0 | 1 | 1 | 1 | 1 | 1 | 1 | 1 | 1 | 1 | 10          | 0.5549  |
| 600 | mp-961703  | NaLiPt            | 1 | 1 | 1 | 1 | 1 | 1 | 0 | 1 | 1 | 0 | 1 | 1 | 10          | 0.5526  |
| 601 | mp-9124    | LiZnAs            | 1 | 1 | 1 | 1 | 1 | 1 | 0 | 1 | 1 | 0 | 1 | 1 | 10          | 0.5475  |
| 602 | mp-924129  | ZrNiSn            | 1 | 1 | 1 | 1 | 1 | 1 | 0 | 1 | 1 | 0 | 1 | 1 | 10          | 0.4954  |
| 603 | mp-1009894 | ZrC               | 1 | 1 | 1 | 1 | 1 | 1 | 0 | 1 | 1 | 0 | 1 | 1 | 10          | 0.484   |
| 604 | mp-961682  | TiSnPd            | 1 | 1 | 1 | 1 | 1 | 1 | 0 | 1 | 1 | 0 | 1 | 1 | 10          | 0.4691  |
| 605 | mp-961646  | TiTeOs            | 1 | 1 | 1 | 1 | 1 | 1 | 0 | 1 | 1 | 0 | 1 | 1 | 10          | 0.4298  |
| 606 | mp-924128  | HfNiSn            | 1 | 1 | 1 | 1 | 1 | 1 | 0 | 1 | 1 | 0 | 1 | 1 | 10          | 0.3854  |
| 607 | mp-570213  | LiMgBi            | 1 | 0 | 0 | 1 | 1 | 1 | 1 | 1 | 1 | 1 | 1 | 1 | 10          | 0.3619  |
| 608 | mp-567636  | VFeSb             | 1 | 1 | 1 | 1 | 1 | 1 | 0 | 1 | 1 | 0 | 1 | 1 | 10          | 0.3487  |
| 609 | mp-22786   | ThNiSn            | 1 | 1 | 1 | 1 | 1 | 1 | 0 | 1 | 1 | 0 | 1 | 1 | 10          | 0.2714  |
| 610 | mp-23703   | LiH               | 1 | 1 | 0 | 1 | 1 | 1 | 1 | 1 | 0 | 1 | 1 | 1 | 10          | 2.9737  |
| 611 | mp-1266    | Na2Se             | 1 | 1 | 0 | 1 | 1 | 1 | 1 | 1 | 1 | 0 | 1 | 1 | 10          | 2.0162  |
| 612 | mp-1958    | SrTe              | 1 | 0 | 1 | 1 | 1 | 1 | 0 | 1 | 1 | 1 | 1 | 1 | 10          | 1.7623  |
| 613 | mp-2172    | AlAs              | 1 | 1 | 1 | 1 | 1 | 1 | 0 | 1 | 1 | 0 | 1 | 1 | 10          | 1.5037  |
| 614 | mp-22895   | CuI               | 1 | 1 | 1 | 1 | 0 | 1 | 0 | 1 | 1 | 1 | 1 | 1 | 10          | 1.1363  |
| 615 | mp-4510    | DyNiSb            | 1 | 1 | 1 | 1 | 1 | 1 | 0 | 1 | 1 | 0 | 1 | 1 | 10          | 0.3133  |
| 616 | mp-3432    | ScNiSb            | 1 | 1 | 1 | 1 | 1 | 1 | 0 | 1 | 1 | 0 | 1 | 1 | 10          | 0.268   |
| 617 | mp-4025    | TmNiSb            | 1 | 1 | 1 | 1 | 1 | 1 | 0 | 1 | 1 | 0 | 1 | 1 | 10          | 0.2527  |
| 618 | mp-31455   | VSbRu             | 1 | 1 | 1 | 1 | 1 | 1 | 0 | 1 | 1 | 0 | 1 | 1 | 10          | 0.2161  |
| 619 | mp-20185   | LuNiSb            | 1 | 1 | 1 | 1 | 1 | 1 | 0 | 1 | 1 | 0 | 1 | 1 | 10          | 0.2159  |
| 620 | mp-30459   | ScNiBi            | 1 | 1 | 1 | 1 | 1 | 1 | 0 | 1 | 1 | 0 | 1 | 1 | 10          | 0.1844  |
| 621 | mp-19962   | Sn2Pt             | 1 | 1 | 1 | 1 | 1 | 1 | 0 | 1 | 1 | 0 | 1 | 1 | 10          | 0       |
| 622 | mp-20305   | InAs              | 1 | 1 | 1 | 1 | 1 | 1 | 0 | 1 | 1 | 0 | 1 | 1 | 10          | 0       |
| 623 | mp-10183   | MgSbPd            | 1 | 1 | 1 | 1 | 1 | 1 | 0 | 1 | 1 | 0 | 1 | 1 | 10          | 0       |
| 624 | mp-979963  | Yb3Ti             | 1 | 0 | 0 | 1 | 1 | 1 | 1 | 1 | 1 | 1 | 1 | 1 | 10          | 0       |
| 625 | mp-867811  | TaMnRu2           | 1 | 1 | 0 | 1 | 0 | 1 | 1 | 1 | 1 | 1 | 1 | 1 | 10          | 0       |
| 626 | mp-20340   | EuN               | 1 | 1 | 1 | 1 | 1 | 1 | 0 | 1 | 1 | 0 | 1 | 1 | 10          | 0       |
| 627 | mp-1002114 | VH                | 1 | 1 | 1 | 1 | 1 | 1 | 0 | 1 | 1 | 0 | 1 | 1 | 10          | 0       |
| 628 | mp-11488   | LaTl              | 1 | 1 | 1 | 1 | 1 | 1 | 0 | 1 | 1 | 0 | 1 | 1 | 10          | 0       |
| 629 | mp-11573   | TiTc              | 1 | 1 | 1 | 1 | 1 | 1 | 0 | 1 | 1 | 0 | 1 | 1 | 10          | 0       |
| 630 | mp-1086    | TaC               | 1 | 1 | 1 | 1 | 1 | 1 | 0 | 1 | 1 | 0 | 1 | 1 | 10          | 0       |
| 631 | mp-11258   | TbAu              | 1 | 1 | 1 | 1 | 1 | 1 | 0 | 1 | 1 | 0 | 1 | 1 | 10          | 0       |

| No. | cif_id     | Crystal structure | A | B | C | D | E | F | G | H | I | J | K | L | Total match | Bandgap |
|-----|------------|-------------------|---|---|---|---|---|---|---|---|---|---|---|---|-------------|---------|
| 632 | mp-1335    | VFe               | 1 | 1 | 1 | 1 | 1 | 1 | 0 | 1 | 1 | 0 | 1 | 1 | 10          | 0       |
| 633 | mp-510404  | GdSe              | 1 | 1 | 1 | 1 | 1 | 1 | 0 | 1 | 1 | 0 | 1 | 1 | 10          | 0       |
| 634 | mp-30455   | HoBiPt            | 1 | 1 | 1 | 1 | 1 | 1 | 0 | 1 | 1 | 0 | 1 | 1 | 10          | 0       |
| 635 | mp-974310  | In3Ge             | 1 | 1 | 0 | 1 | 0 | 1 | 1 | 1 | 1 | 1 | 1 | 1 | 10          | 0       |
| 636 | mp-1018136 | LaBiPt            | 1 | 1 | 1 | 1 | 1 | 1 | 0 | 1 | 1 | 0 | 1 | 1 | 10          | 0       |
| 637 | mp-865843  | YbNdZn2           | 1 | 0 | 0 | 1 | 1 | 1 | 1 | 1 | 1 | 1 | 1 | 1 | 10          | 0       |
| 638 | mp-8638    | Tc                | 1 | 1 | 1 | 1 | 1 | 1 | 0 | 1 | 1 | 0 | 1 | 1 | 10          | 0       |
| 639 | mp-631463  | CuTcBi            | 1 | 1 | 1 | 1 | 1 | 1 | 0 | 1 | 1 | 0 | 1 | 1 | 10          | 0       |
| 640 | mp-592     | TiRu              | 1 | 1 | 1 | 1 | 1 | 1 | 0 | 1 | 1 | 0 | 1 | 1 | 10          | 0       |
| 641 | mp-1101    | TmAs              | 1 | 1 | 1 | 1 | 1 | 1 | 0 | 1 | 1 | 0 | 1 | 1 | 10          | 0       |
| 642 | mp-1144    | ErP               | 1 | 1 | 1 | 1 | 1 | 1 | 0 | 1 | 1 | 0 | 1 | 1 | 10          | 0       |
| 643 | mp-39      | Tl                | 1 | 1 | 1 | 1 | 1 | 1 | 0 | 1 | 1 | 0 | 1 | 1 | 10          | 0       |
| 644 | mp-24153   | LaH2              | 1 | 1 | 1 | 1 | 1 | 1 | 0 | 1 | 1 | 0 | 1 | 1 | 10          | 0       |
| 645 | mp-631301  | HgPRh             | 1 | 1 | 1 | 1 | 1 | 1 | 0 | 1 | 1 | 0 | 1 | 1 | 10          | 0       |
| 646 | mp-2186    | NpAs              | 1 | 1 | 1 | 1 | 1 | 1 | 0 | 1 | 1 | 0 | 1 | 1 | 10          | 0       |
| 647 | mp-972352  | YbMg              | 1 | 1 | 1 | 1 | 1 | 1 | 0 | 1 | 1 | 0 | 1 | 1 | 10          | 0       |
| 648 | mp-867224  | CaNdCd2           | 1 | 0 | 0 | 1 | 1 | 1 | 1 | 1 | 1 | 1 | 1 | 1 | 10          | 0       |
| 649 | mp-861892  | DyInRh2           | 1 | 1 | 0 | 1 | 0 | 1 | 1 | 1 | 1 | 1 | 1 | 1 | 10          | 0       |
| 650 | mp-41      | Zr                | 1 | 1 | 1 | 1 | 1 | 1 | 0 | 1 | 1 | 0 | 1 | 1 | 10          | 0       |
| 651 | mp-865471  | VGaTc2            | 1 | 1 | 0 | 1 | 0 | 1 | 1 | 1 | 1 | 1 | 1 | 1 | 10          | 0       |
| 652 | mp-2197    | BaHg              | 1 | 1 | 1 | 1 | 1 | 1 | 0 | 1 | 1 | 0 | 1 | 1 | 10          | 0       |
| 653 | mp-962073  | KBaSn             | 1 | 1 | 1 | 1 | 1 | 1 | 0 | 1 | 1 | 0 | 1 | 1 | 10          | 0       |
| 654 | mp-631     | TiC               | 1 | 1 | 1 | 1 | 1 | 1 | 0 | 1 | 1 | 0 | 1 | 1 | 10          | 0       |
| 655 | mp-1009217 | MnSb              | 1 | 1 | 1 | 1 | 1 | 1 | 0 | 1 | 1 | 0 | 1 | 1 | 10          | 0       |
| 656 | mp-980006  | Yb3Os             | 1 | 1 | 0 | 1 | 0 | 1 | 1 | 1 | 1 | 1 | 1 | 1 | 10          | 0       |
| 657 | mp-1009131 | MnAs              | 1 | 1 | 1 | 1 | 1 | 1 | 0 | 1 | 1 | 0 | 1 | 1 | 10          | 0       |
| 658 | mp-977409  | NbTc2Ge           | 1 | 1 | 0 | 1 | 0 | 1 | 1 | 1 | 1 | 1 | 1 | 1 | 10          | 0       |
| 659 | mp-631338  | LiZrSc            | 1 | 1 | 1 | 1 | 1 | 1 | 0 | 1 | 1 | 0 | 1 | 1 | 10          | 0       |
| 660 | mp-1073    | CaCd              | 1 | 1 | 1 | 1 | 1 | 1 | 0 | 1 | 1 | 0 | 1 | 1 | 10          | 0       |
| 661 | mp-519     | USb               | 1 | 1 | 1 | 1 | 1 | 1 | 0 | 1 | 1 | 0 | 1 | 1 | 10          | 0       |
| 662 | mp-1172    | MgRh              | 1 | 1 | 1 | 1 | 1 | 1 | 0 | 1 | 1 | 0 | 1 | 1 | 10          | 0       |
| 663 | mp-571     | TiNi              | 1 | 1 | 1 | 1 | 1 | 1 | 0 | 1 | 1 | 0 | 1 | 1 | 10          | 0       |
| 664 | mp-4076    | VCoSb             | 1 | 1 | 1 | 1 | 1 | 1 | 0 | 1 | 1 | 0 | 1 | 1 | 10          | 0       |
| 665 | mp-1009079 | CrTe              | 1 | 1 | 1 | 1 | 1 | 1 | 0 | 1 | 1 | 0 | 1 | 1 | 10          | 0       |
| 666 | mp-2442    | ErAu              | 1 | 1 | 1 | 1 | 1 | 1 | 0 | 1 | 1 | 0 | 1 | 1 | 10          | 0       |
| 667 | mp-1008728 | Ni                | 1 | 1 | 1 | 1 | 1 | 1 | 0 | 1 | 1 | 0 | 1 | 1 | 10          | 0       |
| 668 | mp-976793  | LiEr2Ga           | 1 | 0 | 0 | 1 | 1 | 1 | 1 | 1 | 1 | 1 | 1 | 1 | 10          | 0       |
| 669 | mp-866157  | TiGaRh2           | 1 | 1 | 0 | 1 | 0 | 1 | 1 | 1 | 1 | 1 | 1 | 1 | 10          | 0       |
| 670 | mp-20582   | LaIn              | 1 | 1 | 1 | 1 | 1 | 1 | 0 | 1 | 1 | 0 | 1 | 1 | 10          | 0       |
| 671 | mp-631503  | ZrAlW             | 1 | 1 | 1 | 0 | 1 | 1 | 0 | 1 | 1 | 1 | 1 | 1 | 10          | 0       |
| 672 | mp-2012    | LiHg              | 1 | 1 | 1 | 1 | 1 | 1 | 0 | 1 | 1 | 0 | 1 | 1 | 10          | 0       |
| 673 | mp-85      | In                | 1 | 1 | 1 | 1 | 1 | 1 | 0 | 1 | 1 | 0 | 1 | 1 | 10          | 0       |
| 674 | mp-985806  | Al2Cu             | 1 | 1 | 1 | 1 | 1 | 1 | 0 | 1 | 1 | 0 | 1 | 1 | 10          | 0       |
| 675 | mp-631468  | SrScBe            | 1 | 1 | 1 | 1 | 1 | 1 | 0 | 1 | 1 | 0 | 1 | 1 | 10          | 0       |

| No. | cif_id     | Crystal structure | A | B | C | D | E | F | G | H | I | J | K | L | Total match | Bandgap |
|-----|------------|-------------------|---|---|---|---|---|---|---|---|---|---|---|---|-------------|---------|
| 676 | mp-979259  | V2ReMo            | 1 | 1 | 0 | 1 | 0 | 1 | 1 | 1 | 1 | 1 | 1 | 1 | 10          | 0       |
| 677 | mp-984791  | CaTmCd2           | 1 | 0 | 0 | 1 | 1 | 1 | 1 | 1 | 1 | 1 | 1 | 1 | 10          | 0       |
| 678 | mp-1009206 | MnSn              | 1 | 1 | 1 | 1 | 1 | 1 | 0 | 1 | 1 | 0 | 1 | 1 | 10          | 0       |
| 679 | mp-2       | Pd                | 1 | 1 | 1 | 1 | 1 | 1 | 0 | 1 | 1 | 0 | 1 | 1 | 10          | 0       |
| 680 | mp-2743    | LiPd              | 1 | 1 | 1 | 1 | 1 | 1 | 0 | 1 | 1 | 0 | 1 | 1 | 10          | 0       |
| 681 | mp-1009207 | MnSb              | 1 | 1 | 1 | 1 | 1 | 1 | 0 | 1 | 1 | 0 | 1 | 1 | 10          | 0       |
| 682 | mp-981384  | ScOs3             | 1 | 1 | 0 | 1 | 0 | 1 | 1 | 1 | 1 | 1 | 1 | 1 | 10          | 0       |
| 683 | mp-1688    | ErAs              | 1 | 1 | 1 | 1 | 1 | 1 | 0 | 1 | 1 | 0 | 1 | 1 | 10          | 0       |
| 684 | mp-284     | AlCo              | 1 | 1 | 1 | 1 | 1 | 1 | 0 | 1 | 1 | 0 | 1 | 1 | 10          | 0       |
| 685 | mp-980052  | Yb3In             | 1 | 0 | 0 | 1 | 1 | 1 | 1 | 1 | 1 | 1 | 1 | 1 | 10          | 0       |
| 686 | mp-980062  | YbErZn2           | 1 | 0 | 0 | 1 | 1 | 1 | 1 | 1 | 1 | 1 | 1 | 1 | 10          | 0       |
| 687 | mp-961722  | TiBiRh            | 1 | 1 | 1 | 1 | 1 | 1 | 0 | 1 | 1 | 0 | 1 | 1 | 10          | 0       |
| 688 | mp-604453  | CeBiPd            | 1 | 1 | 1 | 1 | 1 | 1 | 0 | 1 | 1 | 0 | 1 | 1 | 10          | 0       |
| 689 | mp-31459   | TaCoSb            | 1 | 1 | 1 | 1 | 1 | 1 | 0 | 1 | 1 | 0 | 1 | 1 | 10          | 0       |
| 690 | mp-22320   | GaRu              | 1 | 1 | 1 | 1 | 1 | 1 | 0 | 1 | 1 | 0 | 1 | 1 | 10          | 0       |
| 691 | mp-631515  | CaHfZn            | 1 | 1 | 1 | 1 | 1 | 1 | 0 | 1 | 1 | 0 | 1 | 1 | 10          | 0       |
| 692 | mp-1009264 | NbCo              | 1 | 1 | 1 | 1 | 1 | 1 | 0 | 1 | 1 | 0 | 1 | 1 | 10          | 0       |
| 693 | mp-21215   | InPd              | 1 | 1 | 1 | 1 | 1 | 1 | 0 | 1 | 1 | 0 | 1 | 1 | 10          | 0       |
| 694 | mp-24719   | NiH               | 1 | 1 | 1 | 1 | 1 | 1 | 0 | 1 | 1 | 0 | 1 | 1 | 10          | 0       |
| 695 | mp-631299  | NbCrCo            | 1 | 1 | 1 | 0 | 1 | 1 | 0 | 1 | 1 | 1 | 1 | 1 | 10          | 0       |
| 696 | mp-865992  | YbSnRh2           | 1 | 1 | 0 | 1 | 0 | 1 | 1 | 1 | 1 | 1 | 1 | 1 | 10          | 0       |
| 697 | mp-291     | TiOs              | 1 | 1 | 1 | 1 | 1 | 1 | 0 | 1 | 1 | 0 | 1 | 1 | 10          | 0       |
| 698 | mp-1018155 | MnSn              | 1 | 1 | 1 | 1 | 1 | 1 | 0 | 1 | 1 | 0 | 1 | 1 | 10          | 0       |
| 699 | mp-979939  | Yb3W              | 1 | 1 | 0 | 1 | 0 | 1 | 1 | 1 | 1 | 1 | 1 | 1 | 10          | 0       |
| 700 | mp-10054   | ZrAs              | 1 | 1 | 1 | 1 | 1 | 1 | 0 | 1 | 1 | 0 | 1 | 1 | 10          | 0       |
| 701 | mp-1610    | TbS               | 1 | 1 | 1 | 1 | 1 | 1 | 0 | 1 | 1 | 0 | 1 | 1 | 10          | 0       |
| 702 | mp-567389  | Li2ZnGe           | 1 | 0 | 0 | 1 | 1 | 1 | 1 | 1 | 1 | 1 | 1 | 1 | 10          | 0       |
| 703 | mp-862713  | BeGeRu2           | 1 | 1 | 0 | 1 | 0 | 1 | 1 | 1 | 1 | 1 | 1 | 1 | 10          | 0       |
| 704 | mp-864620  | CaSmCd2           | 1 | 0 | 0 | 1 | 1 | 1 | 1 | 1 | 1 | 1 | 1 | 1 | 10          | 0       |
| 705 | mp-11375   | EuHg              | 1 | 0 | 1 | 1 | 1 | 1 | 0 | 1 | 1 | 1 | 1 | 1 | 10          | 0       |
| 706 | mp-862774  | LiInPt2           | 1 | 1 | 0 | 1 | 0 | 1 | 1 | 1 | 1 | 1 | 1 | 1 | 10          | 0       |
| 707 | mp-926     | PuP               | 1 | 1 | 1 | 1 | 1 | 1 | 0 | 1 | 1 | 0 | 1 | 1 | 10          | 0       |
| 708 | mp-829     | AlPd              | 1 | 1 | 1 | 1 | 1 | 1 | 0 | 1 | 1 | 0 | 1 | 1 | 10          | 0       |
| 709 | mp-635426  | GdAu              | 1 | 1 | 1 | 1 | 1 | 1 | 0 | 1 | 1 | 0 | 1 | 1 | 10          | 0       |
| 710 | mp-8642    | Re                | 1 | 1 | 1 | 1 | 1 | 1 | 0 | 1 | 1 | 0 | 1 | 1 | 10          | 0       |
| 711 | mp-1009885 | ZrN               | 1 | 1 | 1 | 1 | 1 | 1 | 0 | 1 | 1 | 0 | 1 | 1 | 10          | 0       |
| 712 | mp-1008926 | CrTe              | 1 | 1 | 1 | 1 | 1 | 1 | 0 | 1 | 1 | 0 | 1 | 1 | 10          | 0       |
| 713 | mp-1912    | ZnAg              | 1 | 1 | 1 | 1 | 1 | 1 | 0 | 1 | 1 | 0 | 1 | 1 | 10          | 0       |
| 714 | mp-7163    | Tb                | 1 | 1 | 1 | 1 | 1 | 1 | 0 | 1 | 1 | 0 | 1 | 1 | 10          | 0       |
| 715 | mp-1018074 | GaFeNi2           | 1 | 1 | 0 | 1 | 0 | 1 | 1 | 1 | 1 | 1 | 1 | 1 | 10          | 0       |
| 716 | mp-980905  | ZnSn3             | 1 | 1 | 0 | 1 | 0 | 1 | 1 | 1 | 1 | 1 | 1 | 1 | 10          | 0       |
| 717 | mp-980947  | SrCaHg2           | 1 | 0 | 0 | 1 | 1 | 1 | 1 | 1 | 1 | 1 | 1 | 1 | 10          | 0       |
| 718 | mp-1002122 | HfIr              | 1 | 1 | 1 | 1 | 1 | 1 | 0 | 1 | 1 | 0 | 1 | 1 | 10          | 0       |
| 719 | mp-2545    | YbHg              | 1 | 1 | 1 | 1 | 1 | 1 | 0 | 1 | 1 | 0 | 1 | 1 | 10          | 0       |

| No. | cif_id     | Crystal structure | A | B | C | D | E | F | G | H | I | J | K | L | Total match | Bandgap |
|-----|------------|-------------------|---|---|---|---|---|---|---|---|---|---|---|---|-------------|---------|
| 720 | mp-7171    | TmP               | 1 | 1 | 1 | 1 | 1 | 1 | 0 | 1 | 1 | 0 | 1 | 1 | 10          | 0       |
| 721 | mp-2493    | CeN               | 1 | 1 | 1 | 1 | 1 | 1 | 0 | 1 | 1 | 0 | 1 | 1 | 10          | 0       |
| 722 | mp-864883  | MgSnPd2           | 1 | 1 | 0 | 1 | 0 | 1 | 1 | 1 | 1 | 1 | 1 | 1 | 10          | 0       |
| 723 | mp-832     | HoPd              | 1 | 1 | 1 | 1 | 1 | 1 | 0 | 1 | 1 | 0 | 1 | 1 | 10          | 0       |
| 724 | mp-31458   | TiSbRu            | 1 | 1 | 1 | 1 | 1 | 1 | 0 | 1 | 1 | 0 | 1 | 1 | 10          | 0       |
| 725 | mp-631452  | NbCrW             | 1 | 1 | 1 | 0 | 1 | 1 | 0 | 1 | 1 | 1 | 1 | 1 | 10          | 0       |
| 726 | mp-864734  | HfInPd2           | 1 | 1 | 0 | 1 | 0 | 1 | 1 | 1 | 1 | 1 | 1 | 1 | 10          | 0       |
| 727 | mp-980049  | Yb3Re             | 1 | 0 | 0 | 1 | 1 | 1 | 1 | 1 | 1 | 1 | 1 | 1 | 10          | 0       |
| 728 | mp-571363  | YbSbPd            | 1 | 1 | 1 | 0 | 1 | 1 | 0 | 1 | 1 | 1 | 1 | 1 | 10          | 0       |
| 729 | mp-11261   | YAu               | 1 | 1 | 1 | 1 | 1 | 1 | 0 | 1 | 1 | 0 | 1 | 1 | 10          | 0       |
| 730 | mp-2226    | DyPd              | 1 | 1 | 1 | 1 | 1 | 1 | 0 | 1 | 1 | 0 | 1 | 1 | 10          | 0       |
| 731 | mp-867902  | LiSiRh2           | 1 | 1 | 0 | 1 | 0 | 1 | 1 | 1 | 1 | 1 | 1 | 1 | 10          | 0       |
| 732 | mp-868003  | LaInAu2           | 1 | 1 | 0 | 1 | 0 | 1 | 1 | 1 | 1 | 1 | 1 | 1 | 10          | 0       |
| 733 | mp-12086   | Cu3Pt             | 1 | 1 | 0 | 1 | 0 | 1 | 1 | 1 | 1 | 1 | 1 | 1 | 10          | 0       |
| 734 | mp-1009592 | CrFeTe            | 1 | 1 | 1 | 1 | 1 | 1 | 0 | 1 | 1 | 0 | 1 | 1 | 10          | 0       |
| 735 | mp-631543  | AllnB             | 1 | 1 | 1 | 1 | 1 | 1 | 0 | 1 | 1 | 0 | 1 | 1 | 10          | 0       |
| 736 | mp-31460   | NbCoSb            | 1 | 1 | 1 | 1 | 1 | 1 | 0 | 1 | 1 | 0 | 1 | 1 | 10          | 0       |
| 737 | mp-1395    | VRu               | 1 | 1 | 1 | 1 | 1 | 1 | 0 | 1 | 1 | 0 | 1 | 1 | 10          | 0       |
| 738 | mp-962067  | BaNaSn            | 1 | 1 | 1 | 1 | 1 | 1 | 0 | 1 | 1 | 0 | 1 | 1 | 10          | 0       |
| 739 | mp-10154   | MnSblr            | 1 | 1 | 1 | 1 | 1 | 1 | 0 | 1 | 1 | 0 | 1 | 1 | 10          | 0       |
| 740 | mp-631462  | BeTcSe            | 1 | 1 | 1 | 1 | 1 | 1 | 0 | 1 | 1 | 0 | 1 | 1 | 10          | 0       |
| 741 | mp-2548    | PuAs              | 1 | 1 | 1 | 1 | 1 | 1 | 0 | 1 | 1 | 0 | 1 | 1 | 10          | 0       |
| 742 | mp-8635    | Zr                | 1 | 1 | 1 | 1 | 1 | 1 | 0 | 1 | 1 | 0 | 1 | 1 | 10          | 0       |
| 743 | mp-15778   | MgNiSb            | 1 | 1 | 1 | 1 | 1 | 1 | 0 | 1 | 1 | 0 | 1 | 1 | 10          | 0       |
| 744 | mp-1008874 | MnCoTe            | 1 | 1 | 1 | 1 | 1 | 1 | 0 | 1 | 1 | 0 | 1 | 1 | 10          | 0       |
| 745 | mp-30658   | VGaNi2            | 1 | 1 | 0 | 1 | 0 | 1 | 1 | 1 | 1 | 1 | 1 | 1 | 10          | 0       |
| 746 | mp-1007657 | HfRu3             | 1 | 1 | 0 | 1 | 0 | 1 | 1 | 1 | 1 | 1 | 1 | 1 | 10          | 0       |
| 747 | mp-12558   | LiMgAs            | 1 | 1 | 1 | 1 | 1 | 1 | 0 | 1 | 1 | 0 | 1 | 1 | 10          | 0       |
| 748 | mp-631255  | InSilr            | 1 | 1 | 1 | 1 | 1 | 1 | 0 | 1 | 1 | 0 | 1 | 1 | 10          | 0       |
| 749 | mp-31457   | ZrSbRu            | 1 | 1 | 1 | 1 | 1 | 1 | 0 | 1 | 1 | 0 | 1 | 1 | 10          | 0       |
| 750 | mp-475     | SnP               | 1 | 1 | 1 | 1 | 1 | 1 | 0 | 1 | 1 | 0 | 1 | 1 | 10          | 0       |
| 751 | mp-2323    | BeCu              | 1 | 1 | 1 | 1 | 1 | 1 | 0 | 1 | 1 | 0 | 1 | 1 | 10          | 0       |
| 752 | mp-631384  | Sr2VW             | 1 | 0 | 0 | 1 | 1 | 1 | 1 | 1 | 1 | 1 | 1 | 1 | 10          | 0       |
| 753 | mp-1008872 | MnFeTe            | 1 | 1 | 1 | 1 | 1 | 1 | 0 | 1 | 1 | 0 | 1 | 1 | 10          | 0       |
| 754 | mp-2104    | UAs               | 1 | 1 | 1 | 1 | 1 | 1 | 0 | 1 | 1 | 0 | 1 | 1 | 10          | 0       |
| 755 | mp-744     | HoP               | 1 | 1 | 1 | 1 | 1 | 1 | 0 | 1 | 1 | 0 | 1 | 1 | 10          | 0       |
| 756 | mp-600124  | MnNiSb            | 1 | 1 | 1 | 1 | 1 | 1 | 0 | 1 | 1 | 0 | 1 | 1 | 10          | 0       |
| 757 | mp-11388   | Galr              | 1 | 1 | 1 | 1 | 1 | 1 | 0 | 1 | 1 | 0 | 1 | 1 | 10          | 0       |
| 758 | mp-865920  | YbPmZn2           | 1 | 0 | 0 | 1 | 1 | 1 | 1 | 1 | 1 | 1 | 1 | 1 | 10          | 0       |
| 759 | mp-567089  | YbRh              | 1 | 1 | 1 | 1 | 1 | 1 | 0 | 1 | 1 | 0 | 1 | 1 | 10          | 0       |
| 760 | mp-2547    | YbPd              | 1 | 1 | 1 | 1 | 1 | 1 | 0 | 1 | 1 | 0 | 1 | 1 | 10          | 0       |
| 761 | mp-12778   | VOs               | 1 | 1 | 1 | 1 | 1 | 1 | 0 | 1 | 1 | 0 | 1 | 1 | 10          | 0       |
| 762 | mp-2658    | AlFe              | 1 | 1 | 1 | 1 | 1 | 1 | 0 | 1 | 1 | 0 | 1 | 1 | 10          | 0       |
| 763 | mp-11452   | HfOs              | 1 | 1 | 1 | 1 | 1 | 1 | 0 | 1 | 1 | 0 | 1 | 1 | 10          | 0       |

| No. | cif_id     | Crystal structure | A | B | C | D | E | F | G | H | I | J | K | L | Total match | Bandgap |
|-----|------------|-------------------|---|---|---|---|---|---|---|---|---|---|---|---|-------------|---------|
| 764 | mp-1018145 | MnSn              | 1 | 1 | 1 | 1 | 1 | 1 | 0 | 1 | 1 | 0 | 1 | 1 | 10          | 0       |
| 765 | mp-1703    | YbZn              | 1 | 1 | 1 | 1 | 1 | 1 | 0 | 1 | 1 | 0 | 1 | 1 | 10          | 0       |
| 766 | mp-1476    | ScS               | 1 | 1 | 1 | 1 | 1 | 1 | 0 | 1 | 1 | 0 | 1 | 1 | 10          | 0       |
| 767 | mp-631540  | NiBTe             | 1 | 1 | 1 | 1 | 1 | 1 | 0 | 1 | 1 | 0 | 1 | 1 | 10          | 0       |
| 768 | mp-50      | Ta                | 1 | 1 | 1 | 1 | 1 | 1 | 0 | 1 | 1 | 0 | 1 | 1 | 10          | 0       |
| 769 | mp-1008875 | Mn2Sb             | 1 | 1 | 1 | 1 | 1 | 1 | 0 | 1 | 1 | 0 | 1 | 1 | 10          | 0       |
| 770 | mp-3201    | Li2GaPd           | 1 | 0 | 0 | 1 | 1 | 1 | 1 | 1 | 1 | 1 | 1 | 1 | 10          | 0       |
| 771 | mp-2802    | HfRu              | 1 | 1 | 1 | 1 | 1 | 1 | 0 | 1 | 1 | 0 | 1 | 1 | 10          | 0       |
| 772 | mp-1486    | ZnNi              | 1 | 1 | 1 | 1 | 1 | 1 | 0 | 1 | 1 | 0 | 1 | 1 | 10          | 0       |
| 773 | mp-631430  | LaInW             | 1 | 1 | 1 | 1 | 1 | 1 | 0 | 1 | 1 | 0 | 1 | 1 | 10          | 0       |
| 774 | mp-864876  | TbInRh2           | 1 | 1 | 0 | 1 | 0 | 1 | 1 | 1 | 1 | 1 | 1 | 1 | 10          | 0       |
| 775 | mp-961656  | VFeTe             | 1 | 1 | 1 | 1 | 1 | 1 | 0 | 1 | 1 | 0 | 1 | 1 | 10          | 0       |
| 776 | mp-2818    | YbAu              | 1 | 1 | 1 | 1 | 1 | 1 | 0 | 1 | 1 | 0 | 1 | 1 | 10          | 0       |
| 777 | mp-1561    | TbSe              | 1 | 1 | 1 | 1 | 1 | 1 | 0 | 1 | 1 | 0 | 1 | 1 | 10          | 0       |
| 778 | mp-1009593 | CrCoTe            | 1 | 1 | 1 | 1 | 1 | 1 | 0 | 1 | 1 | 0 | 1 | 1 | 10          | 0       |
| 779 | mp-1129    | Sclr              | 1 | 1 | 1 | 1 | 1 | 1 | 0 | 1 | 1 | 0 | 1 | 1 | 10          | 0       |
| 780 | mp-4262    | BeAlB             | 1 | 1 | 1 | 1 | 1 | 1 | 0 | 1 | 1 | 0 | 1 | 1 | 10          | 0       |
| 781 | mp-930     | ZrP               | 1 | 1 | 1 | 1 | 1 | 1 | 0 | 1 | 1 | 0 | 1 | 1 | 10          | 0       |
| 782 | mp-865577  | Li2CdAu           | 1 | 1 | 0 | 1 | 0 | 1 | 1 | 1 | 1 | 1 | 1 | 1 | 10          | 0       |
| 783 | mp-2288    | PuSe              | 1 | 1 | 1 | 1 | 1 | 1 | 0 | 1 | 1 | 0 | 1 | 1 | 10          | 0       |
| 784 | mp-931     | ThP               | 1 | 1 | 1 | 1 | 1 | 1 | 0 | 1 | 1 | 0 | 1 | 1 | 10          | 0       |
| 785 | mp-899     | InRh              | 1 | 1 | 1 | 1 | 1 | 1 | 0 | 1 | 1 | 0 | 1 | 1 | 10          | 0       |
| 786 | mp-2011    | UP                | 1 | 1 | 1 | 1 | 1 | 1 | 0 | 1 | 1 | 0 | 1 | 1 | 10          | 0       |
| 787 | mp-1161    | LaSe              | 1 | 1 | 1 | 1 | 1 | 1 | 0 | 1 | 1 | 0 | 1 | 1 | 10          | 0       |
| 788 | mp-10194   | LuSbPt            | 1 | 1 | 1 | 1 | 1 | 1 | 0 | 1 | 1 | 0 | 1 | 1 | 10          | 0       |
| 789 | mp-851     | ErPd              | 1 | 1 | 1 | 1 | 1 | 1 | 0 | 1 | 1 | 0 | 1 | 1 | 10          | 0       |
| 790 | mp-1282    | VC                | 1 | 1 | 1 | 1 | 1 | 1 | 0 | 1 | 1 | 0 | 1 | 1 | 10          | 0       |
| 791 | mp-2083    | Sn2Ir             | 1 | 1 | 1 | 1 | 1 | 1 | 0 | 1 | 1 | 0 | 1 | 1 | 10          | 0       |
| 792 | mp-2183    | ThSe              | 1 | 1 | 1 | 1 | 1 | 1 | 0 | 1 | 1 | 0 | 1 | 1 | 10          | 0       |
| 793 | mp-976596  | LiLu2Ga           | 1 | 0 | 0 | 1 | 1 | 1 | 1 | 1 | 1 | 1 | 1 | 1 | 10          | 0       |
| 794 | mp-1018161 | CrNiSb            | 1 | 1 | 1 | 1 | 1 | 1 | 0 | 1 | 1 | 0 | 1 | 1 | 10          | 0       |
| 795 | mp-12110   | TaRu              | 1 | 1 | 1 | 1 | 1 | 1 | 0 | 1 | 1 | 0 | 1 | 1 | 10          | 0       |
| 796 | mp-11245   | HoAu              | 1 | 1 | 1 | 1 | 1 | 1 | 0 | 1 | 1 | 0 | 1 | 1 | 10          | 0       |
| 797 | mp-10635   | SnSb              | 1 | 1 | 1 | 1 | 1 | 1 | 0 | 1 | 1 | 0 | 1 | 1 | 10          | 0       |
| 798 | mp-23      | Ni                | 1 | 1 | 1 | 1 | 1 | 1 | 0 | 1 | 1 | 0 | 1 | 1 | 10          | 0       |
| 799 | mp-348     | TmPd              | 1 | 1 | 1 | 1 | 1 | 1 | 0 | 1 | 1 | 0 | 1 | 1 | 10          | 0       |
| 800 | mp-21418   | MnSnPt            | 1 | 1 | 1 | 1 | 1 | 1 | 0 | 1 | 1 | 0 | 1 | 1 | 10          | 0       |
| 801 | mp-2179    | TiRe              | 1 | 1 | 1 | 1 | 1 | 1 | 0 | 1 | 1 | 0 | 1 | 1 | 10          | 0       |
| 802 | mp-1487    | AlNi              | 1 | 1 | 1 | 1 | 1 | 1 | 0 | 1 | 1 | 0 | 1 | 1 | 10          | 0       |
| 803 | mp-31452   | ZrNiBi            | 1 | 1 | 1 | 1 | 1 | 1 | 0 | 1 | 1 | 0 | 1 | 1 | 10          | 0       |
| 804 | mp-2540    | VTc               | 1 | 1 | 1 | 1 | 1 | 1 | 0 | 1 | 1 | 0 | 1 | 1 | 10          | 0       |
| 805 | mp-631274  | KFeP              | 1 | 1 | 1 | 1 | 1 | 1 | 0 | 1 | 1 | 0 | 1 | 1 | 10          | 0       |
| 806 | mp-631449  | LiTaBe            | 1 | 1 | 1 | 1 | 1 | 1 | 0 | 1 | 1 | 0 | 1 | 1 | 10          | 0       |
| 807 | mp-1008999 | LaSe              | 1 | 1 | 1 | 1 | 1 | 1 | 0 | 1 | 1 | 0 | 1 | 1 | 10          | 0       |

| No. | cif_id | Crystal structure | A | B | C | D | E | F | G | H | I | J | K | L | Total match | Bandgap |
|-----|--------|-------------------|---|---|---|---|---|---|---|---|---|---|---|---|-------------|---------|
| 808 | mp-987 | ZnCu              | 1 | 1 | 1 | 1 | 1 | 1 | 0 | 1 | 1 | 0 | 1 | 1 | 10          | 0       |
| 809 | mp-256 | LaN               | 1 | 1 | 1 | 1 | 1 | 1 | 0 | 1 | 1 | 0 | 1 | 1 | 10          | 0       |

Supplementary Table 8. True positive candidate list for  $E_{\text{fermi}} \leq 0.4\text{eV}$ .

| No. | cif_id     | Crystal structure | A | B | C | D | E | F | G | H | I | J | K | L | Total match | Bandgap | pred_Ef | actual_Ef |
|-----|------------|-------------------|---|---|---|---|---|---|---|---|---|---|---|---|-------------|---------|---------|-----------|
| 1   | mp-648     | Na2S              | 1 | 1 | 1 | 1 | 1 | 1 | 1 | 1 | 1 | 1 | 1 | 1 | 12          | 2.4399  | 0.2652  | 0.2843    |
| 2   | mp-961683  | LiMgP             | 1 | 1 | 1 | 1 | 1 | 1 | 1 | 1 | 1 | 1 | 1 | 1 | 12          | 1.8107  | 3.1024  | 2.7892    |
| 3   | mp-971     | K2O               | 1 | 1 | 1 | 1 | 1 | 1 | 1 | 1 | 1 | 1 | 1 | 1 | 12          | 1.7072  | 0.4962  | 0.3983    |
| 4   | mp-961660  | TiFeSe            | 1 | 1 | 1 | 1 | 1 | 1 | 1 | 1 | 1 | 1 | 1 | 1 | 12          | 0.987   | 7.245   | 6.8588    |
| 5   | mp-961661  | ZrSiPd            | 1 | 1 | 1 | 1 | 1 | 1 | 1 | 1 | 1 | 1 | 1 | 1 | 12          | 0.7448  | 5.2604  | 5.1529    |
| 6   | mp-10623   | ThSbRh            | 1 | 1 | 1 | 1 | 1 | 1 | 1 | 1 | 1 | 1 | 1 | 1 | 12          | 0.7444  | 7.2799  | 7.0322    |
| 7   | mp-2612    | GeTe              | 1 | 1 | 1 | 1 | 1 | 1 | 1 | 1 | 1 | 1 | 1 | 1 | 12          | 0.3631  | 4.8339  | 5.1041    |
| 8   | mp-1018118 | TmSbPd            | 1 | 1 | 1 | 1 | 1 | 1 | 1 | 1 | 1 | 1 | 1 | 1 | 12          | 0.3569  | 5.0512  | 5.0181    |
| 9   | mp-865101  | NaLi2Bi           | 1 | 1 | 1 | 1 | 1 | 1 | 1 | 1 | 1 | 1 | 1 | 1 | 12          | 0.3251  | 3.1734  | 2.9574    |
| 10  | mp-11390   | LiGaSi            | 1 | 1 | 1 | 1 | 1 | 1 | 1 | 1 | 1 | 1 | 1 | 1 | 12          | 0.1909  | 4.3002  | 4.3938    |
| 11  | mp-3161    | LiAlSi            | 1 | 1 | 1 | 1 | 1 | 1 | 1 | 1 | 1 | 1 | 1 | 1 | 12          | 0.1121  | 4.8157  | 4.9571    |
| 12  | mp-962064  | NaYSn             | 1 | 1 | 1 | 1 | 1 | 1 | 1 | 1 | 1 | 1 | 1 | 1 | 12          | 0.1018  | 2.9243  | 2.6526    |
| 13  | mp-1779    | YbTe              | 1 | 1 | 1 | 1 | 1 | 1 | 1 | 1 | 1 | 1 | 1 | 1 | 12          | 1.4688  | 3.2703  | 3.1704    |
| 14  | mp-10182   | LiZnP             | 1 | 1 | 1 | 1 | 1 | 1 | 1 | 1 | 1 | 1 | 1 | 1 | 12          | 1.3386  | 3.3371  | 3.2728    |
| 15  | mp-19717   | TePb              | 1 | 1 | 1 | 1 | 1 | 1 | 1 | 1 | 1 | 1 | 1 | 1 | 12          | 0.8072  | 4.8376  | 5.0414    |
| 16  | mp-2074    | Li3Sb             | 1 | 1 | 1 | 1 | 1 | 1 | 1 | 1 | 1 | 1 | 1 | 1 | 12          | 0.6961  | 3.5173  | 3.3089    |
| 17  | mp-5077    | NaLi2Sb           | 1 | 1 | 1 | 1 | 1 | 1 | 1 | 1 | 1 | 1 | 1 | 1 | 12          | 0.68    | 3.51    | 3.2153    |
| 18  | mp-20351   | InP               | 1 | 1 | 1 | 1 | 1 | 1 | 1 | 1 | 1 | 1 | 1 | 1 | 12          | 0.4679  | 4.8848  | 4.6896    |
| 19  | mp-505297  | NbSbRu            | 1 | 1 | 1 | 1 | 1 | 1 | 1 | 1 | 1 | 1 | 1 | 1 | 12          | 0.3749  | 7.3196  | 6.9668    |
| 20  | mp-30373   | RbAu              | 1 | 1 | 1 | 1 | 1 | 1 | 1 | 1 | 1 | 1 | 1 | 1 | 12          | 0.3714  | 0.4183  | 0.6106    |
| 21  | mp-23222   | Li3Bi             | 1 | 1 | 1 | 1 | 1 | 1 | 1 | 1 | 1 | 1 | 1 | 1 | 12          | 0.3429  | 3.2173  | 2.9226    |
| 22  | mp-1367    | Mg2Si             | 1 | 1 | 1 | 1 | 1 | 1 | 1 | 1 | 1 | 1 | 1 | 1 | 12          | 0.2169  | 4.2855  | 4.2152    |
| 23  | mp-408     | Mg2Ge             | 1 | 1 | 1 | 1 | 1 | 1 | 1 | 1 | 1 | 1 | 1 | 1 | 12          | 0.1689  | 3.3123  | 3.2815    |
| 24  | mp-1876    | SnS               | 1 | 1 | 1 | 1 | 1 | 1 | 1 | 1 | 1 | 1 | 1 | 1 | 12          | 0.0894  | 6.5547  | 6.5138    |
| 25  | mp-5920    | LiAlGe            | 1 | 1 | 1 | 1 | 1 | 1 | 1 | 1 | 1 | 1 | 1 | 1 | 12          | 0.0564  | 3.9252  | 3.8344    |
| 26  | mp-867912  | Ba2SnHg           | 1 | 1 | 1 | 1 | 1 | 1 | 1 | 1 | 1 | 1 | 1 | 1 | 12          | 0.0498  | 3.1841  | 3.1876    |
| 27  | mp-961676  | HfGePt            | 1 | 1 | 1 | 1 | 1 | 1 | 1 | 1 | 1 | 1 | 1 | 1 | 12          | 0       | 4.165   | 4.2578    |
| 28  | mp-865142  | DyMgZn2           | 1 | 1 | 1 | 1 | 1 | 1 | 1 | 1 | 1 | 1 | 1 | 1 | 12          | 0       | 3.3187  | 3.3628    |
| 29  | mp-862755  | PrCd3             | 1 | 1 | 1 | 1 | 1 | 1 | 1 | 1 | 1 | 1 | 1 | 1 | 12          | 0       | 3.1755  | 3.2451    |
| 30  | mp-974253  | HoErZn2           | 1 | 1 | 1 | 1 | 1 | 1 | 1 | 1 | 1 | 1 | 1 | 1 | 12          | 0       | 3.2725  | 3.0863    |
| 31  | mp-712     | YCu               | 1 | 1 | 1 | 1 | 1 | 1 | 1 | 1 | 1 | 1 | 1 | 1 | 12          | 0       | 4.6197  | 4.5059    |
| 32  | mp-631570  | BaTaB             | 1 | 1 | 1 | 1 | 1 | 1 | 1 | 1 | 1 | 1 | 1 | 1 | 12          | 0       | 3.7945  | 3.7217    |
| 33  | mp-631429  | ZrCrFe            | 1 | 1 | 1 | 1 | 1 | 1 | 1 | 1 | 1 | 1 | 1 | 1 | 12          | 0       | 4.7023  | 4.3951    |
| 34  | mp-1352    | ZrN               | 1 | 1 | 1 | 1 | 1 | 1 | 1 | 1 | 1 | 1 | 1 | 1 | 12          | 0       | 7.3777  | 7.3603    |
| 35  | mp-213     | CaPd              | 1 | 1 | 1 | 1 | 1 | 1 | 1 | 1 | 1 | 1 | 1 | 1 | 12          | 0       | 3.6951  | 3.5913    |
| 36  | mp-972630  | SmErZn2           | 1 | 1 | 1 | 1 | 1 | 1 | 1 | 1 | 1 | 1 | 1 | 1 | 12          | 0       | 3.2708  | 3.0957    |
| 37  | mp-631568  | AlAgB             | 1 | 1 | 1 | 1 | 1 | 1 | 1 | 1 | 1 | 1 | 1 | 1 | 12          | 0       | 5.0033  | 4.6668    |
| 38  | mp-2861    | CaTi              | 1 | 1 | 1 | 1 | 1 | 1 | 1 | 1 | 1 | 1 | 1 | 1 | 12          | 0       | 4.8534  | 4.8663    |
| 39  | mp-12718   | LiPrSn            | 1 | 1 | 1 | 1 | 1 | 1 | 1 | 1 | 1 | 1 | 1 | 1 | 12          | 0       | 4.2832  | 4.0986    |

| No. | cif_id     | Crystal structure | A | B | C | D | E | F | G | H | I | J | K | L | Total match | Bandgap | pred_Ef | actual_Ef |
|-----|------------|-------------------|---|---|---|---|---|---|---|---|---|---|---|---|-------------|---------|---------|-----------|
| 40  | mp-962068  | CaMgSn            | 1 | 1 | 1 | 1 | 1 | 1 | 1 | 1 | 1 | 1 | 1 | 1 | 12          | 0       | 4.4581  | 4.3148    |
| 41  | mp-11566   | ScZn              | 1 | 1 | 1 | 1 | 1 | 1 | 1 | 1 | 1 | 1 | 1 | 1 | 12          | 0       | 3.9805  | 3.6343    |
| 42  | mp-2054    | TbHg              | 1 | 1 | 1 | 1 | 1 | 1 | 1 | 1 | 1 | 1 | 1 | 1 | 12          | 0       | 3.7396  | 3.8293    |
| 43  | mp-962078  | CaCdSi            | 1 | 1 | 1 | 1 | 1 | 1 | 1 | 1 | 1 | 1 | 1 | 1 | 12          | 0       | 3.5702  | 3.6518    |
| 44  | mp-861948  | LiPm2Al           | 1 | 1 | 1 | 1 | 1 | 1 | 1 | 1 | 1 | 1 | 1 | 1 | 12          | 0       | 3.3899  | 3.1732    |
| 45  | mp-973841  | LiHo2Al           | 1 | 1 | 1 | 1 | 1 | 1 | 1 | 1 | 1 | 1 | 1 | 1 | 12          | 0       | 3.4061  | 3.0956    |
| 46  | mp-1008727 | Ti2Ge             | 1 | 1 | 1 | 1 | 1 | 1 | 1 | 1 | 1 | 1 | 1 | 1 | 12          | 0       | 4.6178  | 4.3671    |
| 47  | mp-2434    | SrTi              | 1 | 1 | 1 | 1 | 1 | 1 | 1 | 1 | 1 | 1 | 1 | 1 | 12          | 0       | 4.1963  | 4.0709    |
| 48  | mp-983425  | Li2PmGe           | 1 | 1 | 1 | 1 | 1 | 1 | 1 | 1 | 1 | 1 | 1 | 1 | 12          | 0       | 3.368   | 3.4629    |
| 49  | mp-866017  | LiNd2Al           | 1 | 1 | 1 | 1 | 1 | 1 | 1 | 1 | 1 | 1 | 1 | 1 | 12          | 0       | 3.171   | 3.2315    |
| 50  | mp-631562  | SiBAu             | 1 | 1 | 1 | 1 | 1 | 1 | 1 | 1 | 1 | 1 | 1 | 1 | 12          | 0       | 6.6072  | 6.4142    |
| 51  | mp-975789  | PrTmMg2           | 1 | 1 | 1 | 1 | 1 | 1 | 1 | 1 | 1 | 1 | 1 | 1 | 12          | 0       | 3.4184  | 3.203     |
| 52  | mp-11475   | TmHg              | 1 | 1 | 1 | 1 | 1 | 1 | 1 | 1 | 1 | 1 | 1 | 1 | 12          | 0       | 3.715   | 3.7645    |
| 53  | mp-1014230 | TiZn              | 1 | 1 | 1 | 1 | 1 | 1 | 1 | 1 | 1 | 1 | 1 | 1 | 12          | 0       | 4.8677  | 4.65      |
| 54  | mp-295     | HoAs              | 1 | 1 | 1 | 1 | 1 | 1 | 1 | 1 | 1 | 1 | 1 | 1 | 12          | 0       | 4.1586  | 3.8571    |
| 55  | mp-861955  | LiPm2Ge           | 1 | 1 | 1 | 1 | 1 | 1 | 1 | 1 | 1 | 1 | 1 | 1 | 12          | 0       | 3.3307  | 3.417     |
| 56  | mp-631521  | BaHfMo            | 1 | 1 | 1 | 1 | 1 | 1 | 1 | 1 | 1 | 1 | 1 | 1 | 12          | 0       | 3.9175  | 3.8222    |
| 57  | mp-631471  | YScBe             | 1 | 1 | 1 | 1 | 1 | 1 | 1 | 1 | 1 | 1 | 1 | 1 | 12          | 0       | 3.2016  | 3.133     |
| 58  | mp-460     | PrZn              | 1 | 1 | 1 | 1 | 1 | 1 | 1 | 1 | 1 | 1 | 1 | 1 | 12          | 0       | 3.3627  | 3.2964    |
| 59  | mp-2823    | NdP               | 1 | 1 | 1 | 1 | 1 | 1 | 1 | 1 | 1 | 1 | 1 | 1 | 12          | 0       | 4.24    | 4.0306    |
| 60  | mp-975822  | PrNdZn2           | 1 | 1 | 1 | 1 | 1 | 1 | 1 | 1 | 1 | 1 | 1 | 1 | 12          | 0       | 3.4053  | 3.2342    |
| 61  | mp-978512  | SmTmMg2           | 1 | 1 | 1 | 1 | 1 | 1 | 1 | 1 | 1 | 1 | 1 | 1 | 12          | 0       | 3.2869  | 3.1013    |
| 62  | mp-972456  | Sm3V              | 1 | 1 | 1 | 1 | 1 | 1 | 1 | 1 | 1 | 1 | 1 | 1 | 12          | 0       | 3.4497  | 3.4442    |
| 63  | mp-977551  | ErLuMg2           | 1 | 1 | 1 | 1 | 1 | 1 | 1 | 1 | 1 | 1 | 1 | 1 | 12          | 0       | 3.3049  | 3.0245    |
| 64  | mp-631544  | BaSiB             | 1 | 1 | 1 | 1 | 1 | 1 | 1 | 1 | 1 | 1 | 1 | 1 | 12          | 0       | 3.2496  | 3.1485    |
| 65  | mp-1156    | GaSb              | 1 | 1 | 1 | 1 | 1 | 1 | 1 | 1 | 1 | 1 | 1 | 1 | 12          | 0       | 3.6943  | 3.7747    |
| 66  | mp-20389   | Na2CdPb           | 1 | 1 | 1 | 1 | 1 | 1 | 1 | 1 | 1 | 1 | 1 | 1 | 12          | 0       | 3.2668  | 3.4387    |
| 67  | mp-2796    | TmAg              | 1 | 1 | 1 | 1 | 1 | 1 | 1 | 1 | 1 | 1 | 1 | 1 | 12          | 0       | 3.4281  | 3.5227    |
| 68  | mp-865426  | YbNdAg2           | 1 | 1 | 1 | 1 | 1 | 1 | 1 | 1 | 1 | 1 | 1 | 1 | 12          | 0       | 3.2532  | 3.0912    |
| 69  | mp-631554  | Na2TiAu           | 1 | 1 | 1 | 1 | 1 | 1 | 1 | 1 | 1 | 1 | 1 | 1 | 12          | 0       | 3.218   | 3.1713    |
| 70  | mp-631422  | CuSiBr            | 1 | 1 | 1 | 1 | 1 | 1 | 1 | 1 | 1 | 1 | 1 | 1 | 12          | 0       | 5.6023  | 5.3149    |
| 71  | mp-864799  | HoLuMg2           | 1 | 1 | 1 | 1 | 1 | 1 | 1 | 1 | 1 | 1 | 1 | 1 | 12          | 0       | 3.2999  | 3.0318    |
| 72  | mp-12793   | NdAl              | 1 | 1 | 1 | 1 | 1 | 1 | 1 | 1 | 1 | 1 | 1 | 1 | 12          | 0       | 5.0322  | 4.7465    |
| 73  | mp-976151  | PrErMg2           | 1 | 1 | 1 | 1 | 1 | 1 | 1 | 1 | 1 | 1 | 1 | 1 | 12          | 0       | 3.4319  | 3.2164    |
| 74  | mp-11469   | PrHg              | 1 | 1 | 1 | 1 | 1 | 1 | 1 | 1 | 1 | 1 | 1 | 1 | 12          | 0       | 3.7211  | 3.6894    |
| 75  | mp-2988    | Li2GaRh           | 1 | 1 | 1 | 1 | 1 | 1 | 1 | 1 | 1 | 1 | 1 | 1 | 12          | 0       | 3.1671  | 3.139     |
| 76  | mp-2696    | MgAg              | 1 | 1 | 1 | 1 | 1 | 1 | 1 | 1 | 1 | 1 | 1 | 1 | 12          | 0       | 4.0674  | 3.9911    |
| 77  | mp-24650   | YH2               | 1 | 1 | 1 | 1 | 1 | 1 | 1 | 1 | 1 | 1 | 1 | 1 | 12          | 0       | 3.4711  | 3.378     |
| 78  | mp-981311  | SrTiHg2           | 1 | 1 | 1 | 1 | 1 | 1 | 1 | 1 | 1 | 1 | 1 | 1 | 12          | 0       | 3.2824  | 3.6621    |
| 79  | mp-2857    | ScN               | 1 | 1 | 1 | 1 | 1 | 1 | 1 | 1 | 1 | 1 | 1 | 1 | 12          | 0       | 5.7665  | 5.516     |
| 80  | mp-862902  | PmDyMg2           | 1 | 1 | 1 | 1 | 1 | 1 | 1 | 1 | 1 | 1 | 1 | 1 | 12          | 0       | 3.3366  | 3.1782    |
| 81  | mp-2167    | DyAg              | 1 | 1 | 1 | 1 | 1 | 1 | 1 | 1 | 1 | 1 | 1 | 1 | 12          | 0       | 3.7544  | 3.5891    |
| 82  | mp-1955    | ErCu              | 1 | 1 | 1 | 1 | 1 | 1 | 1 | 1 | 1 | 1 | 1 | 1 | 12          | 0       | 4.5955  | 4.4461    |
| 83  | mp-23171   | PrBi              | 1 | 1 | 1 | 1 | 1 | 1 | 1 | 1 | 1 | 1 | 1 | 1 | 12          | 0       | 4.1732  | 4.37      |



| No. | cif_id     | Crystal structure | A | B | C | D | E | F | G | H | I | J | K | L | Total match | Bandgap | pred_Ef | actual_Ef |
|-----|------------|-------------------|---|---|---|---|---|---|---|---|---|---|---|---|-------------|---------|---------|-----------|
| 84  | mp-2249    | HoZn              | 1 | 1 | 1 | 1 | 1 | 1 | 1 | 1 | 1 | 1 | 1 | 1 | 12          | 0       | 3.2665  | 3.0679    |
| 85  | mp-972522  | SmTmZn2           | 1 | 1 | 1 | 1 | 1 | 1 | 1 | 1 | 1 | 1 | 1 | 1 | 12          | 0       | 3.2843  | 3.0675    |
| 86  | mp-976008  | NdTmMg2           | 1 | 1 | 1 | 1 | 1 | 1 | 1 | 1 | 1 | 1 | 1 | 1 | 12          | 0       | 3.3412  | 3.1592    |
| 87  | mp-1586    | NdSb              | 1 | 1 | 1 | 1 | 1 | 1 | 1 | 1 | 1 | 1 | 1 | 1 | 12          | 0       | 4.8819  | 4.7092    |
| 88  | mp-866015  | CaPrZn2           | 1 | 1 | 1 | 1 | 1 | 1 | 1 | 1 | 1 | 1 | 1 | 1 | 12          | 0       | 3.1382  | 2.915     |
| 89  | mp-656     | LuS               | 1 | 1 | 1 | 1 | 1 | 1 | 1 | 1 | 1 | 1 | 1 | 1 | 12          | 0       | 7.1375  | 6.896     |
| 90  | mp-11313   | ZrCd3             | 1 | 1 | 1 | 1 | 1 | 1 | 1 | 1 | 1 | 1 | 1 | 1 | 12          | 0       | 3.2682  | 2.9675    |
| 91  | mp-30648   | LiMg2Ga           | 1 | 1 | 1 | 1 | 1 | 1 | 1 | 1 | 1 | 1 | 1 | 1 | 12          | 0       | 3.4309  | 3.5287    |
| 92  | mp-972156  | TbY3              | 1 | 1 | 1 | 1 | 1 | 1 | 1 | 1 | 1 | 1 | 1 | 1 | 12          | 0       | 3.3557  | 3.2027    |
| 93  | mp-983126  | HoTmZn2           | 1 | 1 | 1 | 1 | 1 | 1 | 1 | 1 | 1 | 1 | 1 | 1 | 12          | 0       | 3.2364  | 3.0329    |
| 94  | mp-2525    | PrAg              | 1 | 1 | 1 | 1 | 1 | 1 | 1 | 1 | 1 | 1 | 1 | 1 | 12          | 0       | 3.8799  | 3.5918    |
| 95  | mp-11503   | MnZn              | 1 | 1 | 1 | 1 | 1 | 1 | 1 | 1 | 1 | 1 | 1 | 1 | 12          | 0       | 4.3216  | 4.292     |
| 96  | mp-631317  | NalrPb            | 1 | 1 | 1 | 1 | 1 | 1 | 1 | 1 | 1 | 1 | 1 | 1 | 12          | 0       | 4.9502  | 4.705     |
| 97  | mp-862740  | Sr2TlCd           | 1 | 1 | 1 | 1 | 1 | 1 | 1 | 1 | 1 | 1 | 1 | 1 | 12          | 0       | 3.0467  | 3.0867    |
| 98  | mp-979937  | Yb3Ru             | 1 | 1 | 1 | 1 | 1 | 1 | 1 | 1 | 1 | 1 | 1 | 1 | 12          | 0       | 3.1789  | 3.1569    |
| 99  | mp-862964  | PmSmMg2           | 1 | 1 | 1 | 1 | 1 | 1 | 1 | 1 | 1 | 1 | 1 | 1 | 12          | 0       | 3.2862  | 3.1832    |
| 100 | mp-631314  | KTaPt             | 1 | 1 | 1 | 1 | 1 | 1 | 1 | 1 | 1 | 1 | 1 | 1 | 12          | 0       | 3.8022  | 3.5448    |
| 101 | mp-979417  | DyYCd2            | 1 | 1 | 1 | 1 | 1 | 1 | 1 | 1 | 1 | 1 | 1 | 1 | 12          | 0       | 3.131   | 3.1235    |
| 102 | mp-999484  | YTi               | 1 | 1 | 1 | 1 | 1 | 1 | 1 | 1 | 1 | 1 | 1 | 1 | 12          | 0       | 4.2916  | 4.0322    |
| 103 | mp-24287   | CrH               | 1 | 1 | 1 | 1 | 1 | 1 | 1 | 1 | 1 | 1 | 1 | 1 | 12          | 0       | 7.2458  | 7.0124    |
| 104 | mp-1837    | TbCu              | 1 | 1 | 1 | 1 | 1 | 1 | 1 | 1 | 1 | 1 | 1 | 1 | 12          | 0       | 4.8254  | 4.5458    |
| 105 | mp-1008753 | Ti2Al             | 1 | 1 | 1 | 1 | 1 | 1 | 1 | 1 | 1 | 1 | 1 | 1 | 12          | 0       | 4.739   | 4.4213    |
| 106 | mp-1009538 | PdC               | 1 | 1 | 1 | 1 | 1 | 1 | 1 | 1 | 1 | 1 | 1 | 1 | 12          | 0       | 5.1523  | 4.7999    |
| 107 | mp-978513  | SmErMg2           | 1 | 1 | 1 | 1 | 1 | 1 | 1 | 1 | 1 | 1 | 1 | 1 | 12          | 0       | 3.2767  | 3.1299    |
| 108 | mp-972640  | SmDyZn2           | 1 | 1 | 1 | 1 | 1 | 1 | 1 | 1 | 1 | 1 | 1 | 1 | 12          | 0       | 3.2577  | 3.1205    |
| 109 | mp-631311  | IrOsW             | 1 | 1 | 1 | 1 | 1 | 1 | 1 | 1 | 1 | 1 | 1 | 1 | 12          | 0       | 6.7325  | 6.4455    |
| 110 | mp-631542  | BaZrNi            | 1 | 1 | 1 | 1 | 1 | 1 | 1 | 1 | 1 | 1 | 1 | 1 | 12          | 0       | 3.2369  | 3.4405    |
| 111 | mp-862937  | PmMgZn2           | 1 | 1 | 1 | 1 | 1 | 1 | 1 | 1 | 1 | 1 | 1 | 1 | 12          | 0       | 3.3116  | 3.3279    |
| 112 | mp-1009458 | NbC               | 1 | 1 | 1 | 1 | 1 | 1 | 1 | 1 | 1 | 1 | 1 | 1 | 12          | 0       | 5.0072  | 4.7239    |
| 113 | mp-1236    | NdAg              | 1 | 1 | 1 | 1 | 1 | 1 | 1 | 1 | 1 | 1 | 1 | 1 | 12          | 0       | 3.583   | 3.514     |
| 114 | mp-631492  | BaSclr            | 1 | 1 | 1 | 1 | 1 | 1 | 1 | 1 | 1 | 1 | 1 | 1 | 12          | 0       | 4.1979  | 3.8697    |
| 115 | mp-2334    | DyCu              | 1 | 1 | 1 | 1 | 1 | 1 | 1 | 1 | 1 | 1 | 1 | 1 | 12          | 0       | 4.7132  | 4.5112    |
| 116 | mp-1008876 | MnCoS             | 1 | 1 | 1 | 1 | 1 | 1 | 1 | 1 | 1 | 1 | 1 | 1 | 12          | 0       | 7.2915  | 6.9389    |
| 117 | mp-2497    | GdZn              | 1 | 1 | 1 | 1 | 1 | 1 | 1 | 1 | 1 | 1 | 1 | 1 | 12          | 0       | 3.2807  | 2.9191    |
| 118 | mp-11563   | TiRh              | 1 | 1 | 1 | 1 | 1 | 1 | 1 | 1 | 1 | 1 | 1 | 1 | 12          | 0       | 7.1493  | 7.2107    |
| 119 | mp-631534  | NaSrRe2           | 1 | 1 | 1 | 1 | 1 | 1 | 1 | 1 | 1 | 1 | 1 | 1 | 12          | 0       | 3.2494  | 3.2633    |
| 120 | mp-631383  | MnCrRe            | 1 | 1 | 1 | 1 | 1 | 1 | 1 | 1 | 1 | 1 | 1 | 1 | 12          | 0       | 5.0061  | 4.7507    |
| 121 | mp-972601  | SmLuMg2           | 1 | 1 | 1 | 1 | 1 | 1 | 1 | 1 | 1 | 1 | 1 | 1 | 12          | 0       | 3.2927  | 3.0997    |
| 122 | mp-1971    | HoCu              | 1 | 1 | 1 | 1 | 1 | 1 | 1 | 1 | 1 | 1 | 1 | 1 | 12          | 0       | 4.5822  | 4.4552    |
| 123 | mp-631541  | BeGeB             | 1 | 1 | 1 | 1 | 1 | 1 | 1 | 1 | 1 | 1 | 1 | 1 | 12          | 0       | 5.275   | 5.1763    |
| 124 | mp-861886  | LiDyHg2           | 1 | 1 | 1 | 1 | 1 | 1 | 1 | 1 | 1 | 1 | 1 | 1 | 12          | 0       | 3.1945  | 2.8112    |
| 125 | mp-11344   | PrO               | 1 | 1 | 1 | 1 | 1 | 1 | 1 | 1 | 1 | 1 | 1 | 1 | 12          | 0       | 6.7417  | 6.5295    |
| 126 | mp-631337  | NaTaNi            | 1 | 1 | 1 | 1 | 1 | 1 | 1 | 1 | 1 | 1 | 1 | 1 | 12          | 0       | 3.6374  | 3.4858    |
| 127 | mp-836     | TbZn              | 1 | 1 | 1 | 1 | 1 | 1 | 1 | 1 | 1 | 1 | 1 | 1 | 12          | 0       | 3.3642  | 3.2052    |

| No. | cif_id     | Crystal structure | A | B | C | D | E | F | G | H | I | J | K | L | Total match | Bandgap | pred_Ef | actual_Ef |
|-----|------------|-------------------|---|---|---|---|---|---|---|---|---|---|---|---|-------------|---------|---------|-----------|
| 128 | mp-865911  | YbPmHg2           | 1 | 1 | 1 | 1 | 1 | 1 | 1 | 1 | 1 | 1 | 1 | 1 | 12          | 0       | 3.2071  | 3.2187    |
| 129 | mp-865896  | YbPmAg2           | 1 | 1 | 1 | 1 | 1 | 1 | 1 | 1 | 1 | 1 | 1 | 1 | 12          | 0       | 3.1242  | 3.0786    |
| 130 | mp-978823  | SmY3              | 1 | 1 | 1 | 1 | 1 | 1 | 1 | 1 | 1 | 1 | 1 | 1 | 12          | 0       | 3.276   | 3.1308    |
| 131 | mp-24724   | TbH2              | 1 | 1 | 1 | 1 | 1 | 1 | 1 | 1 | 1 | 1 | 1 | 1 | 12          | 0       | 3.4564  | 3.2313    |
| 132 | mp-2195    | LuMg              | 1 | 1 | 1 | 1 | 1 | 1 | 1 | 1 | 1 | 1 | 1 | 1 | 12          | 0       | 3.2922  | 3.0198    |
| 133 | mp-2268    | TbAg              | 1 | 1 | 1 | 1 | 1 | 1 | 1 | 1 | 1 | 1 | 1 | 1 | 12          | 0       | 3.5333  | 3.638     |
| 134 | mp-631394  | CaZrPd            | 1 | 1 | 1 | 1 | 1 | 1 | 1 | 1 | 1 | 1 | 1 | 1 | 12          | 0       | 3.4108  | 3.3652    |
| 135 | mp-631349  | ZnTcMo            | 1 | 1 | 1 | 1 | 1 | 1 | 1 | 1 | 1 | 1 | 1 | 1 | 12          | 0       | 5.0035  | 4.6481    |
| 136 | mp-962071  | MgScTi            | 1 | 1 | 1 | 1 | 1 | 1 | 1 | 1 | 1 | 1 | 1 | 1 | 12          | 0       | 3.7623  | 3.7303    |
| 137 | mp-982388  | HoTmMg2           | 1 | 1 | 1 | 1 | 1 | 1 | 1 | 1 | 1 | 1 | 1 | 1 | 12          | 0       | 3.2857  | 3.0487    |
| 138 | mp-973276  | HoLuCd2           | 1 | 1 | 1 | 1 | 1 | 1 | 1 | 1 | 1 | 1 | 1 | 1 | 12          | 0       | 3.1205  | 3.0768    |
| 139 | mp-34611   | ZnAgAs            | 1 | 1 | 1 | 1 | 1 | 1 | 1 | 1 | 1 | 1 | 1 | 1 | 12          | 0       | 3.5985  | 3.3492    |
| 140 | mp-867222  | LiCa2Ir           | 1 | 1 | 1 | 1 | 1 | 1 | 1 | 1 | 1 | 1 | 1 | 1 | 12          | 0       | 3.5017  | 3.3786    |
| 141 | mp-1014219 | HfZn              | 1 | 1 | 1 | 1 | 1 | 1 | 1 | 1 | 1 | 1 | 1 | 1 | 12          | 0       | 4.3148  | 4.2543    |
| 142 | mp-22873   | SmBi              | 1 | 1 | 1 | 1 | 1 | 1 | 1 | 1 | 1 | 1 | 1 | 1 | 12          | 0       | 4.5447  | 4.4017    |
| 143 | mp-542779  | GdAg              | 1 | 1 | 1 | 1 | 1 | 1 | 1 | 1 | 1 | 1 | 1 | 1 | 12          | 0       | 3.697   | 3.2987    |
| 144 | mp-980198  | TmLuZn2           | 1 | 1 | 1 | 1 | 1 | 1 | 1 | 1 | 1 | 1 | 1 | 1 | 12          | 0       | 3.2979  | 3.0928    |
| 145 | mp-978094  | NdHo3             | 1 | 1 | 1 | 1 | 1 | 1 | 1 | 1 | 1 | 1 | 1 | 1 | 12          | 0       | 3.2739  | 3.1524    |
| 146 | mp-980055  | YErMg2            | 1 | 1 | 1 | 1 | 1 | 1 | 1 | 1 | 1 | 1 | 1 | 1 | 12          | 0       | 3.2697  | 3.0946    |
| 147 | mp-861913  | LiDy2Al           | 1 | 1 | 1 | 1 | 1 | 1 | 1 | 1 | 1 | 1 | 1 | 1 | 12          | 0       | 3.466   | 3.1446    |
| 148 | mp-961671  | TiGePt            | 1 | 1 | 1 | 1 | 1 | 1 | 1 | 1 | 1 | 1 | 1 | 1 | 12          | 0       | 5.3129  | 5.0225    |
| 149 | mp-23300   | NdBi              | 1 | 1 | 1 | 1 | 1 | 1 | 1 | 1 | 1 | 1 | 1 | 1 | 12          | 0       | 4.5109  | 4.3712    |
| 150 | mp-979419  | Dy3Y              | 1 | 1 | 1 | 1 | 1 | 1 | 1 | 1 | 1 | 1 | 1 | 1 | 12          | 0       | 3.2658  | 3.1677    |
| 151 | mp-571059  | YCd3              | 1 | 1 | 1 | 1 | 1 | 1 | 1 | 1 | 1 | 1 | 1 | 1 | 12          | 0       | 3.2976  | 3.3042    |
| 152 | mp-866063  | NdDyMg2           | 1 | 1 | 1 | 1 | 1 | 1 | 1 | 1 | 1 | 1 | 1 | 1 | 12          | 0       | 3.3749  | 3.2117    |
| 153 | mp-2165    | SmZn              | 1 | 1 | 1 | 1 | 1 | 1 | 1 | 1 | 1 | 1 | 1 | 1 | 12          | 0       | 3.2728  | 3.1214    |
| 154 | mp-2516    | YZn               | 1 | 1 | 1 | 1 | 1 | 1 | 1 | 1 | 1 | 1 | 1 | 1 | 12          | 0       | 3.4325  | 3.1441    |
| 155 | mp-976030  | PrHoMg2           | 1 | 1 | 1 | 1 | 1 | 1 | 1 | 1 | 1 | 1 | 1 | 1 | 12          | 0       | 3.4227  | 3.2137    |
| 156 | mp-1008911 | LiMnAs            | 1 | 1 | 1 | 1 | 1 | 1 | 1 | 1 | 1 | 1 | 1 | 1 | 12          | 0       | 3.064   | 3.2213    |
| 157 | mp-862918  | PmHoMg2           | 1 | 1 | 1 | 1 | 1 | 1 | 1 | 1 | 1 | 1 | 1 | 1 | 12          | 0       | 3.2883  | 3.1521    |
| 158 | mp-1008    | NiHg              | 1 | 1 | 1 | 1 | 1 | 1 | 1 | 1 | 1 | 1 | 1 | 1 | 12          | 0       | 5.0576  | 5.3042    |
| 159 | mp-570276  | ZrZn              | 1 | 1 | 1 | 1 | 1 | 1 | 1 | 1 | 1 | 1 | 1 | 1 | 12          | 0       | 3.783   | 3.8634    |
| 160 | mp-866220  | CaNdZn2           | 1 | 1 | 1 | 1 | 1 | 1 | 1 | 1 | 1 | 1 | 1 | 1 | 12          | 0       | 3.1507  | 2.8702    |
| 161 | mp-2502    | TmCd              | 1 | 1 | 1 | 1 | 1 | 1 | 1 | 1 | 1 | 1 | 1 | 1 | 12          | 0       | 3.2527  | 3.0585    |
| 162 | mp-11467   | NdHg              | 1 | 1 | 1 | 1 | 1 | 1 | 1 | 1 | 1 | 1 | 1 | 1 | 12          | 0       | 3.7703  | 3.6354    |
| 163 | mp-631322  | KSnOs             | 1 | 1 | 1 | 1 | 1 | 1 | 1 | 1 | 1 | 1 | 1 | 1 | 12          | 0       | 4.4045  | 4.1273    |
| 164 | mp-962061  | YMgTi             | 1 | 1 | 1 | 1 | 1 | 1 | 1 | 1 | 1 | 1 | 1 | 1 | 12          | 0       | 3.0899  | 3.3273    |
| 165 | mp-972997  | HoErCd2           | 1 | 1 | 1 | 1 | 1 | 1 | 1 | 1 | 1 | 1 | 1 | 1 | 12          | 0       | 3.1334  | 3.0894    |
| 166 | mp-2636    | GdMg              | 1 | 1 | 1 | 1 | 1 | 1 | 1 | 1 | 1 | 1 | 1 | 1 | 12          | 0       | 3.2689  | 2.9839    |
| 167 | mp-864598  | LiMg2Ag           | 1 | 1 | 1 | 1 | 1 | 1 | 1 | 1 | 1 | 1 | 1 | 1 | 12          | 0       | 3.1055  | 3.0678    |
| 168 | mp-11240   | DyAu              | 1 | 1 | 1 | 1 | 1 | 1 | 1 | 1 | 1 | 1 | 1 | 1 | 12          | 0       | 4.8839  | 4.6045    |
| 169 | mp-615     | YMg               | 1 | 1 | 1 | 1 | 1 | 1 | 1 | 1 | 1 | 1 | 1 | 1 | 12          | 0       | 3.2792  | 3.1415    |
| 170 | mp-1001837 | MoP               | 1 | 1 | 1 | 1 | 1 | 1 | 1 | 1 | 1 | 1 | 1 | 1 | 12          | 0       | 5.7182  | 5.4497    |
| 171 | mp-972062  | YbTmHg2           | 1 | 1 | 1 | 1 | 1 | 1 | 1 | 1 | 1 | 1 | 1 | 1 | 12          | 0       | 3.2454  | 3.2159    |

| No. | cif_id     | Crystal structure | A | B | C | D | E | F | G | H | I | J | K | L | Total match | Bandgap | pred_Ef | actual_Ef |
|-----|------------|-------------------|---|---|---|---|---|---|---|---|---|---|---|---|-------------|---------|---------|-----------|
| 172 | mp-2732    | PRh2              | 1 | 1 | 1 | 1 | 1 | 1 | 1 | 1 | 1 | 1 | 1 | 1 | 12          | 0       | 7.2678  | 7.6429    |
| 173 | mp-631324  | HfMnTi            | 1 | 1 | 1 | 1 | 1 | 1 | 1 | 1 | 1 | 1 | 1 | 1 | 12          | 0       | 4.8896  | 5.1903    |
| 174 | mp-861479  | PrYMg2            | 1 | 1 | 1 | 1 | 1 | 1 | 1 | 1 | 1 | 1 | 1 | 1 | 12          | 0       | 3.3661  | 3.2544    |
| 175 | mp-437     | MgAu              | 1 | 1 | 1 | 1 | 1 | 1 | 1 | 1 | 1 | 1 | 1 | 1 | 12          | 0       | 5.0401  | 5.1908    |
| 176 | mp-631482  | BiMoRh            | 1 | 1 | 1 | 1 | 1 | 1 | 1 | 1 | 1 | 1 | 1 | 1 | 12          | 0       | 6.7508  | 6.491     |
| 177 | mp-2474    | YAg               | 1 | 1 | 1 | 1 | 1 | 1 | 1 | 1 | 1 | 1 | 1 | 1 | 12          | 0       | 3.703   | 3.5978    |
| 178 | mp-976426  | LiLuHg2           | 1 | 1 | 1 | 1 | 1 | 1 | 1 | 1 | 1 | 1 | 1 | 1 | 12          | 0       | 3.2134  | 2.8329    |
| 179 | mp-961680  | NbAlPt            | 1 | 1 | 1 | 1 | 1 | 1 | 1 | 1 | 1 | 1 | 1 | 1 | 12          | 0       | 5.1711  | 5.2047    |
| 180 | mp-867873  | LiTm2Al           | 1 | 1 | 1 | 1 | 1 | 1 | 1 | 1 | 1 | 1 | 1 | 1 | 12          | 0       | 3.2999  | 3.1115    |
| 181 | mp-631395  | CaTaTc            | 1 | 1 | 1 | 1 | 1 | 1 | 1 | 1 | 1 | 1 | 1 | 1 | 12          | 0       | 3.8622  | 4.0717    |
| 182 | mp-980942  | YTmMg2            | 1 | 1 | 1 | 1 | 1 | 1 | 1 | 1 | 1 | 1 | 1 | 1 | 12          | 0       | 3.2068  | 3.0714    |
| 183 | mp-11576   | YbTi              | 1 | 1 | 1 | 1 | 1 | 1 | 1 | 1 | 1 | 1 | 1 | 1 | 12          | 0       | 4.6774  | 4.5373    |
| 184 | mp-631484  | TaTiAl            | 1 | 1 | 1 | 1 | 1 | 1 | 1 | 1 | 1 | 1 | 1 | 1 | 12          | 0       | 4.5154  | 4.302     |
| 185 | mp-961669  | NbGaPt            | 1 | 1 | 1 | 1 | 1 | 1 | 1 | 1 | 1 | 1 | 1 | 1 | 12          | 0       | 4.3151  | 4.151     |
| 186 | mp-1013549 | Ba3BiN            | 1 | 1 | 1 | 1 | 1 | 1 | 1 | 1 | 1 | 1 | 1 | 1 | 12          | 0       | 3.3785  | 3.2323    |
| 187 | mp-973232  | NdTm3             | 1 | 1 | 1 | 1 | 1 | 1 | 1 | 1 | 1 | 1 | 1 | 1 | 12          | 0       | 3.1749  | 3.1189    |
| 188 | mp-1660    | ErZn              | 1 | 1 | 1 | 1 | 1 | 1 | 1 | 1 | 1 | 1 | 1 | 1 | 12          | 0       | 3.2735  | 3.0789    |
| 189 | mp-2778    | HoAg              | 1 | 1 | 1 | 1 | 1 | 1 | 1 | 1 | 1 | 1 | 1 | 1 | 12          | 0       | 3.5796  | 3.5528    |
| 190 | mp-976143  | PrDyZn2           | 1 | 1 | 1 | 1 | 1 | 1 | 1 | 1 | 1 | 1 | 1 | 1 | 12          | 0       | 3.2502  | 3.2428    |
| 191 | mp-980082  | YHo3              | 1 | 1 | 1 | 1 | 1 | 1 | 1 | 1 | 1 | 1 | 1 | 1 | 12          | 0       | 3.258   | 3.0769    |
| 192 | mp-975886  | PrSmZn2           | 1 | 1 | 1 | 1 | 1 | 1 | 1 | 1 | 1 | 1 | 1 | 1 | 12          | 0       | 3.3153  | 3.1795    |
| 193 | mp-975972  | PrLuMg2           | 1 | 1 | 1 | 1 | 1 | 1 | 1 | 1 | 1 | 1 | 1 | 1 | 12          | 0       | 3.4678  | 3.1954    |
| 194 | mp-24152   | HoH2              | 1 | 1 | 1 | 1 | 1 | 1 | 1 | 1 | 1 | 1 | 1 | 1 | 12          | 0       | 3.4619  | 3.1836    |
| 195 | mp-631546  | TlCoBi            | 1 | 1 | 1 | 1 | 1 | 1 | 1 | 1 | 1 | 1 | 1 | 1 | 12          | 0       | 4.8257  | 4.9163    |
| 196 | mp-2475    | SmAg              | 1 | 1 | 1 | 1 | 1 | 1 | 1 | 1 | 1 | 1 | 1 | 1 | 12          | 0       | 3.612   | 3.4686    |
| 197 | mp-1211    | ScCd              | 1 | 1 | 1 | 1 | 1 | 1 | 1 | 1 | 1 | 1 | 1 | 1 | 12          | 0       | 3.539   | 3.5494    |
| 198 | mp-1174    | MgSc              | 1 | 1 | 1 | 1 | 1 | 1 | 1 | 1 | 1 | 1 | 1 | 1 | 12          | 0       | 3.7673  | 3.5238    |
| 199 | mp-30779   | SmMg3             | 1 | 1 | 1 | 1 | 1 | 1 | 1 | 1 | 1 | 1 | 1 | 1 | 12          | 0       | 3.5021  | 3.3912    |
| 200 | mp-2283    | ZrCo              | 1 | 1 | 1 | 1 | 1 | 1 | 1 | 1 | 1 | 1 | 1 | 1 | 12          | 0       | 5.218   | 5.1044    |
| 201 | mp-978514  | SmTm3             | 1 | 1 | 1 | 1 | 1 | 1 | 1 | 1 | 1 | 1 | 1 | 1 | 12          | 0       | 3.1595  | 3.0505    |
| 202 | mp-631381  | TeRuSe            | 1 | 1 | 1 | 1 | 1 | 1 | 1 | 1 | 1 | 1 | 1 | 1 | 12          | 0       | 7.3803  | 7.1396    |
| 203 | mp-867149  | Sr2CdSn           | 1 | 1 | 1 | 1 | 1 | 1 | 1 | 1 | 1 | 1 | 1 | 1 | 12          | 0       | 3.4995  | 3.5142    |
| 204 | mp-1008726 | Ti2Ga             | 1 | 1 | 1 | 1 | 1 | 1 | 1 | 1 | 1 | 1 | 1 | 1 | 12          | 0       | 3.7951  | 3.7464    |
| 205 | mp-12586   | SmCu              | 1 | 1 | 1 | 1 | 1 | 1 | 1 | 1 | 1 | 1 | 1 | 1 | 12          | 0       | 4.6212  | 4.3522    |
| 206 | mp-865210  | TmLuMg2           | 1 | 1 | 1 | 1 | 1 | 1 | 1 | 1 | 1 | 1 | 1 | 1 | 12          | 0       | 3.2313  | 2.9988    |
| 207 | mp-631373  | TiVW              | 1 | 1 | 1 | 1 | 1 | 1 | 1 | 1 | 1 | 1 | 1 | 1 | 12          | 0       | 4.9418  | 4.7089    |
| 208 | mp-862555  | LiY2Al            | 1 | 1 | 1 | 1 | 1 | 1 | 1 | 1 | 1 | 1 | 1 | 1 | 12          | 0       | 3.3264  | 3.2089    |
| 209 | mp-866158  | YLuMg2            | 1 | 1 | 1 | 1 | 1 | 1 | 1 | 1 | 1 | 1 | 1 | 1 | 12          | 0       | 3.2975  | 3.0593    |
| 210 | mp-631479  | CaHfBe            | 1 | 1 | 1 | 1 | 1 | 1 | 1 | 1 | 1 | 1 | 1 | 1 | 12          | 0       | 2.949   | 2.7717    |
| 211 | mp-1785    | PrSb              | 1 | 1 | 1 | 1 | 1 | 1 | 1 | 1 | 1 | 1 | 1 | 1 | 12          | 0       | 4.772   | 4.6852    |
| 212 | mp-976032  | PrHoZn2           | 1 | 1 | 1 | 1 | 1 | 1 | 1 | 1 | 1 | 1 | 1 | 1 | 12          | 0       | 3.2704  | 3.2329    |
| 213 | mp-867159  | SmDyMg2           | 1 | 1 | 1 | 1 | 1 | 1 | 1 | 1 | 1 | 1 | 1 | 1 | 12          | 0       | 3.2991  | 3.1691    |
| 214 | mp-2640    | TbAs              | 1 | 1 | 1 | 1 | 1 | 1 | 1 | 1 | 1 | 1 | 1 | 1 | 12          | 0       | 4.2123  | 3.8887    |
| 215 | mp-973058  | LiLu2Al           | 1 | 1 | 1 | 1 | 1 | 1 | 1 | 1 | 1 | 1 | 1 | 1 | 12          | 0       | 3.3562  | 3.1363    |

| No. | cif_id     | Crystal structure | A | B | C | D | E | F | G | H | I | J | K | L | Total match | Bandgap | pred_Ef | actual_Ef |
|-----|------------|-------------------|---|---|---|---|---|---|---|---|---|---|---|---|-------------|---------|---------|-----------|
| 216 | mp-974517  | NdErMg2           | 1 | 1 | 1 | 1 | 1 | 1 | 1 | 1 | 1 | 1 | 1 | 1 | 12          | 0       | 3.3252  | 3.1752    |
| 217 | mp-973333  | HoLuZn2           | 1 | 1 | 1 | 1 | 1 | 1 | 1 | 1 | 1 | 1 | 1 | 1 | 12          | 0       | 3.2616  | 3.0648    |
| 218 | mp-862493  | LiEr2Al           | 1 | 1 | 1 | 1 | 1 | 1 | 1 | 1 | 1 | 1 | 1 | 1 | 12          | 0       | 3.4429  | 3.1262    |
| 219 | mp-11237   | ScAg              | 1 | 1 | 1 | 1 | 1 | 1 | 1 | 1 | 1 | 1 | 1 | 1 | 12          | 0       | 4.1438  | 4.0697    |
| 220 | mp-7381    | TbMg3             | 1 | 1 | 1 | 1 | 1 | 1 | 1 | 1 | 1 | 1 | 1 | 1 | 12          | 0       | 3.5108  | 3.42      |
| 221 | mp-864630  | LiMg2Hg           | 1 | 1 | 1 | 1 | 1 | 1 | 1 | 1 | 1 | 1 | 1 | 1 | 12          | 0       | 3.3338  | 3.359     |
| 222 | mp-976147  | PrEr3             | 1 | 1 | 1 | 1 | 1 | 1 | 1 | 1 | 1 | 1 | 1 | 1 | 12          | 0       | 3.3207  | 3.2068    |
| 223 | mp-866191  | Li2YbSi           | 1 | 1 | 1 | 1 | 1 | 1 | 1 | 1 | 1 | 1 | 1 | 1 | 12          | 0       | 3.0808  | 3.4012    |
| 224 | mp-985     | TmCu              | 1 | 1 | 1 | 1 | 1 | 1 | 1 | 1 | 1 | 1 | 1 | 1 | 12          | 0       | 4.6247  | 4.4514    |
| 225 | mp-974527  | NdSmZn2           | 1 | 1 | 1 | 1 | 1 | 1 | 1 | 1 | 1 | 1 | 1 | 1 | 12          | 0       | 3.3456  | 3.1397    |
| 226 | mp-973759  | Lu2MgCd           | 1 | 1 | 1 | 1 | 1 | 1 | 1 | 1 | 1 | 1 | 1 | 1 | 12          | 0       | 3.1936  | 3.1219    |
| 227 | mp-975848  | PrNdMg2           | 1 | 1 | 1 | 1 | 1 | 1 | 1 | 1 | 1 | 1 | 1 | 1 | 12          | 0       | 3.4282  | 3.2511    |
| 228 | mp-11221   | SmAl              | 1 | 1 | 1 | 1 | 1 | 1 | 1 | 1 | 1 | 1 | 1 | 1 | 12          | 0       | 5.095   | 4.7243    |
| 229 | mp-976129  | PrErZn2           | 1 | 1 | 1 | 1 | 1 | 1 | 1 | 1 | 1 | 1 | 1 | 1 | 12          | 0       | 3.2699  | 3.2209    |
| 230 | mp-2303    | DyZn              | 1 | 1 | 1 | 1 | 1 | 1 | 1 | 1 | 1 | 1 | 1 | 1 | 12          | 0       | 3.2617  | 3.1439    |
| 231 | mp-961726  | NbGeRh            | 1 | 1 | 1 | 1 | 1 | 1 | 1 | 1 | 1 | 1 | 1 | 1 | 12          | 0       | 4.3969  | 4.1615    |
| 232 | mp-754940  | Ba3SiO            | 1 | 1 | 1 | 1 | 1 | 1 | 1 | 1 | 1 | 1 | 1 | 1 | 12          | 0       | 3.1826  | 3.2181    |
| 233 | mp-31168   | Li2AlAg           | 1 | 1 | 1 | 1 | 1 | 1 | 1 | 1 | 1 | 1 | 1 | 1 | 12          | 0       | 3.2704  | 3.0633    |
| 234 | mp-867163  | Sr2AgPt           | 1 | 1 | 1 | 1 | 1 | 1 | 1 | 1 | 1 | 1 | 1 | 1 | 12          | 0       | 3.2977  | 3.3584    |
| 235 | mp-1053    | NdZn              | 1 | 1 | 1 | 1 | 1 | 1 | 1 | 1 | 1 | 1 | 1 | 1 | 12          | 0       | 3.432   | 3.2121    |
| 236 | mp-631335  | MgTaZn            | 1 | 1 | 1 | 1 | 1 | 1 | 1 | 1 | 1 | 1 | 1 | 1 | 12          | 0       | 3.2711  | 3.548     |
| 237 | mp-961699  | NaMgP             | 1 | 1 | 1 | 1 | 1 | 1 | 1 | 1 | 1 | 1 | 1 | 1 | 12          | 0       | 3.0592  | 2.8238    |
| 238 | mp-12087   | Cu2S              | 1 | 1 | 1 | 1 | 1 | 1 | 1 | 1 | 1 | 1 | 1 | 1 | 12          | 0       | 7.3435  | 6.9671    |
| 239 | mp-631506  | SrZrCo            | 1 | 1 | 1 | 1 | 1 | 1 | 1 | 1 | 1 | 1 | 1 | 1 | 12          | 0       | 3.23    | 3.1425    |
| 240 | mp-867158  | SmCd3             | 1 | 1 | 1 | 1 | 1 | 1 | 1 | 1 | 1 | 1 | 1 | 1 | 12          | 0       | 3.1514  | 3.2057    |
| 241 | mp-1007819 | CoW               | 1 | 1 | 1 | 1 | 1 | 1 | 1 | 1 | 1 | 1 | 1 | 1 | 12          | 0       | 6.9553  | 6.5964    |
| 242 | mp-867130  | SmHoMg2           | 1 | 1 | 1 | 1 | 1 | 1 | 1 | 1 | 1 | 1 | 1 | 1 | 12          | 0       | 3.2666  | 3.1265    |
| 243 | mp-24192   | ErH2              | 1 | 1 | 1 | 1 | 1 | 1 | 1 | 1 | 1 | 1 | 1 | 1 | 12          | 0       | 3.4558  | 3.2383    |
| 244 | mp-934     | LiTi              | 1 | 1 | 1 | 1 | 1 | 1 | 1 | 1 | 1 | 1 | 1 | 1 | 12          | 0       | 4.5238  | 4.8548    |
| 245 | mp-710     | SmP               | 1 | 1 | 1 | 1 | 1 | 1 | 1 | 1 | 1 | 1 | 1 | 1 | 12          | 0       | 4.2294  | 4.0539    |
| 246 | mp-975880  | PrSmMg2           | 1 | 1 | 1 | 1 | 1 | 1 | 1 | 1 | 1 | 1 | 1 | 1 | 12          | 0       | 3.3943  | 3.2134    |
| 247 | mp-2621    | ErAg              | 1 | 1 | 1 | 1 | 1 | 1 | 1 | 1 | 1 | 1 | 1 | 1 | 12          | 0       | 3.6062  | 3.5529    |
| 248 | mp-2724    | TbSb              | 1 | 1 | 1 | 1 | 1 | 1 | 1 | 1 | 1 | 1 | 1 | 1 | 12          | 0       | 5.0229  | 5.0018    |
| 249 | mp-24237   | Sch2              | 1 | 1 | 1 | 1 | 1 | 1 | 1 | 1 | 1 | 1 | 1 | 1 | 12          | 0       | 4.3563  | 4.0224    |
| 250 | mp-631269  | LiIrRh            | 1 | 1 | 1 | 1 | 1 | 1 | 1 | 1 | 1 | 1 | 1 | 1 | 12          | 0       | 4.9948  | 4.7661    |
| 251 | mp-973060  | MgCr              | 1 | 1 | 1 | 1 | 1 | 1 | 1 | 1 | 1 | 1 | 1 | 1 | 12          | 0       | 4.2194  | 3.9464    |
| 252 | mp-961711  | ZrSiPt            | 1 | 1 | 1 | 1 | 1 | 1 | 0 | 1 | 1 | 1 | 1 | 1 | 11          | 1.3298  | 5.5778  | 5.5489    |
| 253 | mp-961649  | ZrFeTe            | 1 | 1 | 1 | 1 | 1 | 1 | 0 | 1 | 1 | 1 | 1 | 1 | 11          | 1.1558  | 7.194   | 7.3318    |
| 254 | mp-961706  | TiSiPt            | 1 | 1 | 1 | 1 | 1 | 1 | 0 | 1 | 1 | 1 | 1 | 1 | 11          | 0.993   | 6.8589  | 6.47      |
| 255 | mp-1008680 | TiGePt            | 1 | 1 | 1 | 1 | 1 | 1 | 0 | 1 | 1 | 1 | 1 | 1 | 11          | 0.8819  | 5.5039  | 5.2294    |
| 256 | mp-997618  | BSb               | 1 | 1 | 1 | 1 | 1 | 1 | 0 | 1 | 1 | 1 | 1 | 1 | 11          | 0.7513  | 7.4827  | 7.402     |
| 257 | mp-961774  | BaNaSb            | 1 | 1 | 0 | 1 | 1 | 1 | 1 | 1 | 1 | 1 | 1 | 1 | 11          | 0.7372  | 2.641   | 2.6824    |
| 258 | mp-961657  | YNiP              | 1 | 1 | 1 | 1 | 1 | 1 | 0 | 1 | 1 | 1 | 1 | 1 | 11          | 0.7214  | 5.7735  | 5.8012    |
| 259 | mp-19886   | ThSnPt            | 1 | 1 | 1 | 1 | 1 | 1 | 0 | 1 | 1 | 1 | 1 | 1 | 11          | 0.6738  | 7.0743  | 6.8919    |

| No. | cif_id     | Crystal structure | A | B | C | D | E | F | G | H | I | J | K | L | Total match | Bandgap | pred_Ef | actual_Ef |
|-----|------------|-------------------|---|---|---|---|---|---|---|---|---|---|---|---|-------------|---------|---------|-----------|
| 260 | mp-7173    | ScSbPt            | 1 | 1 | 1 | 1 | 1 | 1 | 0 | 1 | 1 | 1 | 1 | 1 | 11          | 0.6441  | 6.8712  | 6.9454    |
| 261 | mp-961675  | ScNiP             | 1 | 1 | 1 | 1 | 1 | 1 | 0 | 1 | 1 | 1 | 1 | 1 | 11          | 0.5921  | 7.0468  | 7.1642    |
| 262 | mp-9437    | NbFeSb            | 1 | 1 | 1 | 1 | 1 | 1 | 0 | 1 | 1 | 1 | 1 | 1 | 11          | 0.5138  | 7.4875  | 7.1629    |
| 263 | mp-961693  | ZrInAu            | 1 | 1 | 1 | 1 | 1 | 1 | 0 | 1 | 1 | 1 | 1 | 1 | 11          | 0.4532  | 5.8168  | 5.4322    |
| 264 | mp-866132  | Na2TlSb           | 1 | 1 | 0 | 1 | 1 | 1 | 1 | 1 | 1 | 1 | 1 | 1 | 11          | 0.3844  | 3.7245  | 3.5985    |
| 265 | mp-961663  | SrTePd            | 1 | 1 | 1 | 1 | 1 | 1 | 0 | 1 | 1 | 1 | 1 | 1 | 11          | 0.3215  | 4.8325  | 4.6799    |
| 266 | mp-961697  | ScGeAu            | 1 | 1 | 1 | 1 | 1 | 1 | 0 | 1 | 1 | 1 | 1 | 1 | 11          | 0.2804  | 4.4951  | 4.5931    |
| 267 | mp-1550    | AlP               | 1 | 1 | 1 | 1 | 1 | 1 | 1 | 1 | 1 | 0 | 1 | 1 | 11          | 1.6302  | 4.1081  | 4.3526    |
| 268 | mp-2490    | GaP               | 1 | 1 | 1 | 1 | 1 | 1 | 0 | 1 | 1 | 1 | 1 | 1 | 11          | 1.5928  | 3.3661  | 3.4498    |
| 269 | mp-36111   | LiMgP             | 1 | 1 | 0 | 1 | 1 | 1 | 1 | 1 | 1 | 1 | 1 | 1 | 11          | 1.5391  | 2.6744  | 2.7368    |
| 270 | mp-2624    | AlSb              | 1 | 1 | 1 | 1 | 1 | 1 | 1 | 1 | 1 | 0 | 1 | 1 | 11          | 1.2273  | 4.0331  | 4.4141    |
| 271 | mp-31454   | TaSbRu            | 1 | 1 | 1 | 1 | 1 | 1 | 0 | 1 | 1 | 1 | 1 | 1 | 11          | 0.6669  | 7.4924  | 7.2965    |
| 272 | mp-11836   | ErSbPd            | 1 | 1 | 1 | 1 | 1 | 1 | 0 | 1 | 1 | 1 | 1 | 1 | 11          | 0.2096  | 5.8143  | 5.9523    |
| 273 | mp-2114    | YN                | 1 | 1 | 1 | 1 | 1 | 1 | 0 | 1 | 1 | 1 | 1 | 1 | 11          | 0.151   | 4.4608  | 4.1988    |
| 274 | mp-1008858 | NdBiPd            | 1 | 1 | 1 | 1 | 1 | 1 | 0 | 1 | 1 | 1 | 1 | 1 | 11          | 0.1051  | 5.2871  | 5.0598    |
| 275 | mp-13305   | SmSnAu            | 1 | 1 | 1 | 1 | 1 | 1 | 0 | 1 | 1 | 1 | 1 | 1 | 11          | 0.097   | 5.6064  | 5.2119    |
| 276 | mp-631550  | CaBiB             | 1 | 1 | 1 | 1 | 1 | 1 | 0 | 1 | 1 | 1 | 1 | 1 | 11          | 0.0821  | 3.1419  | 3.0328    |
| 277 | mp-961653  | FeSiW             | 1 | 1 | 1 | 1 | 1 | 1 | 0 | 1 | 1 | 1 | 1 | 1 | 11          | 0.065   | 6.9207  | 6.7925    |
| 278 | mp-1883    | SnTe              | 1 | 1 | 1 | 1 | 1 | 1 | 0 | 1 | 1 | 1 | 1 | 1 | 11          | 0.0428  | 6.6076  | 6.3219    |
| 279 | mp-30390   | HoSnAu            | 1 | 1 | 1 | 1 | 1 | 1 | 0 | 1 | 1 | 1 | 1 | 1 | 11          | 0.0235  | 5.7215  | 5.5328    |
| 280 | mp-5640    | ErSnAu            | 1 | 1 | 1 | 1 | 1 | 1 | 0 | 1 | 1 | 1 | 1 | 1 | 11          | 0.0072  | 5.7315  | 5.5847    |
| 281 | mp-1009459 | NbC               | 1 | 1 | 1 | 1 | 1 | 1 | 0 | 1 | 1 | 1 | 1 | 1 | 11          | 0       | 7.0352  | 6.7194    |
| 282 | mp-971702  | YbNdCd2           | 1 | 1 | 0 | 1 | 1 | 1 | 1 | 1 | 1 | 1 | 1 | 1 | 11          | 0       | 2.6218  | 2.6114    |
| 283 | mp-124     | Ag                | 1 | 1 | 1 | 1 | 1 | 1 | 0 | 1 | 1 | 1 | 1 | 1 | 11          | 0       | 3.2334  | 3.0638    |
| 284 | mp-1546    | DyMg3             | 1 | 1 | 0 | 1 | 1 | 1 | 1 | 1 | 1 | 1 | 1 | 1 | 11          | 0       | 3.5441  | 3.4075    |
| 285 | mp-12599   | PrTl              | 1 | 1 | 1 | 1 | 1 | 1 | 0 | 1 | 1 | 1 | 1 | 1 | 11          | 0       | 5.561   | 5.3363    |
| 286 | mp-1502    | Al2Pt             | 1 | 1 | 1 | 1 | 1 | 1 | 0 | 1 | 1 | 1 | 1 | 1 | 11          | 0       | 6.8257  | 6.7538    |
| 287 | mp-1006884 | CoMo              | 1 | 1 | 1 | 1 | 1 | 1 | 0 | 1 | 1 | 1 | 1 | 1 | 11          | 0       | 7.596   | 7.2444    |
| 288 | mp-75      | Nb                | 1 | 1 | 1 | 1 | 1 | 1 | 0 | 1 | 1 | 1 | 1 | 1 | 11          | 0       | 4.9676  | 4.8562    |
| 289 | mp-428     | PrMg3             | 1 | 1 | 0 | 1 | 1 | 1 | 1 | 1 | 1 | 1 | 1 | 1 | 11          | 0       | 3.5991  | 3.4756    |
| 290 | mp-22682   | In2Pt             | 1 | 1 | 1 | 1 | 1 | 1 | 0 | 1 | 1 | 1 | 1 | 1 | 11          | 0       | 7.3414  | 7.1868    |
| 291 | mp-863705  | Pm2MgGa           | 1 | 1 | 0 | 1 | 1 | 1 | 1 | 1 | 1 | 1 | 1 | 1 | 11          | 0       | 3.6977  | 3.5164    |
| 292 | mp-770     | DyCd              | 1 | 1 | 1 | 1 | 1 | 1 | 0 | 1 | 1 | 1 | 1 | 1 | 11          | 0       | 3.083   | 3.1041    |
| 293 | mp-5549    | MgSnAu            | 1 | 1 | 1 | 1 | 1 | 1 | 0 | 1 | 1 | 1 | 1 | 1 | 11          | 0       | 5.766   | 5.4858    |
| 294 | mp-30479   | Ca3Pb             | 1 | 1 | 0 | 1 | 1 | 1 | 1 | 1 | 1 | 1 | 1 | 1 | 11          | 0       | 3.7504  | 3.5001    |
| 295 | mp-961720  | ZrAsRh            | 1 | 1 | 1 | 1 | 1 | 1 | 0 | 1 | 1 | 1 | 1 | 1 | 11          | 0       | 4.4448  | 4.4423    |
| 296 | mp-11843   | DyAl              | 1 | 1 | 1 | 1 | 1 | 1 | 0 | 1 | 1 | 1 | 1 | 1 | 11          | 0       | 5.2906  | 4.9916    |
| 297 | mp-1018132 | AlBi              | 1 | 1 | 1 | 1 | 1 | 1 | 0 | 1 | 1 | 1 | 1 | 1 | 11          | 0       | 3.33    | 3.7003    |
| 298 | mp-2050    | HoSb              | 1 | 1 | 1 | 1 | 1 | 1 | 0 | 1 | 1 | 1 | 1 | 1 | 11          | 0       | 5.172   | 5.0264    |
| 299 | mp-23245   | ErBi              | 1 | 1 | 1 | 1 | 1 | 1 | 0 | 1 | 1 | 1 | 1 | 1 | 11          | 0       | 4.5628  | 4.6886    |
| 300 | mp-961681  | ZrGePt            | 1 | 1 | 1 | 1 | 1 | 1 | 0 | 1 | 1 | 1 | 1 | 1 | 11          | 0       | 3.9917  | 3.9417    |
| 301 | mp-1008689 | Ti2Si             | 1 | 1 | 1 | 1 | 1 | 1 | 0 | 1 | 1 | 1 | 1 | 1 | 11          | 0       | 5.4382  | 5.3887    |
| 302 | mp-631379  | ZnCuMo            | 1 | 1 | 1 | 1 | 1 | 1 | 0 | 1 | 1 | 1 | 1 | 1 | 11          | 0       | 4.5584  | 4.171     |
| 303 | mp-31456   | HfSbRu            | 1 | 1 | 1 | 1 | 1 | 1 | 0 | 1 | 1 | 1 | 1 | 1 | 11          | 0       | 6.9886  | 6.6448    |

| No. | cif_id     | Crystal structure | A | B | C | D | E | F | G | H | I | J | K | L | Total match | Bandgap | pred_Ef | actual_Ef |
|-----|------------|-------------------|---|---|---|---|---|---|---|---|---|---|---|---|-------------|---------|---------|-----------|
| 304 | mp-2316    | TmZn              | 1 | 1 | 1 | 1 | 1 | 1 | 0 | 1 | 1 | 1 | 1 | 1 | 11          | 0       | 3.146   | 3.0531    |
| 305 | mp-961709  | ZrPtPb            | 1 | 1 | 1 | 1 | 1 | 1 | 0 | 1 | 1 | 1 | 1 | 1 | 11          | 0       | 5.4618  | 5.2237    |
| 306 | mp-867145  | LiHo2Ga           | 1 | 1 | 0 | 1 | 1 | 1 | 1 | 1 | 1 | 1 | 1 | 1 | 11          | 0       | 2.7124  | 2.7381    |
| 307 | mp-961702  | LaSbPt            | 1 | 1 | 1 | 1 | 1 | 1 | 0 | 1 | 1 | 1 | 1 | 1 | 11          | 0       | 7.407   | 7.1184    |
| 308 | mp-436     | SmRh              | 1 | 1 | 1 | 1 | 1 | 1 | 0 | 1 | 1 | 1 | 1 | 1 | 11          | 0       | 5.0014  | 4.681     |
| 309 | mp-30377   | ErPbAu            | 1 | 1 | 1 | 1 | 1 | 1 | 0 | 1 | 1 | 1 | 1 | 1 | 11          | 0       | 5.6985  | 5.4104    |
| 310 | mp-1408    | MgHg              | 1 | 1 | 1 | 1 | 1 | 1 | 0 | 1 | 1 | 1 | 1 | 1 | 11          | 0       | 3.9916  | 3.9863    |
| 311 | mp-1013545 | Ca3BiAs           | 1 | 1 | 1 | 1 | 1 | 0 | 1 | 1 | 1 | 1 | 1 | 1 | 11          | 0       | 3.2567  | 3.0414    |
| 312 | mp-866180  | Li2YbPb           | 1 | 1 | 0 | 1 | 1 | 1 | 1 | 1 | 1 | 1 | 1 | 1 | 11          | 0       | 3.7041  | 3.9326    |
| 313 | mp-2210    | ZrCu              | 1 | 1 | 1 | 1 | 1 | 1 | 0 | 1 | 1 | 1 | 1 | 1 | 11          | 0       | 5.4706  | 5.2258    |
| 314 | mp-776     | LaCd              | 1 | 1 | 1 | 1 | 1 | 1 | 0 | 1 | 1 | 1 | 1 | 1 | 11          | 0       | 5.6972  | 5.6551    |
| 315 | mp-2163    | HoRh              | 1 | 1 | 1 | 1 | 1 | 1 | 0 | 1 | 1 | 1 | 1 | 1 | 11          | 0       | 5.0509  | 4.8763    |
| 316 | mp-1006883 | CoNi              | 1 | 1 | 1 | 1 | 1 | 1 | 0 | 1 | 1 | 1 | 1 | 1 | 11          | 0       | 6.8227  | 6.6365    |
| 317 | mp-979989  | Yb2AgPd           | 1 | 1 | 1 | 1 | 1 | 1 | 0 | 1 | 1 | 1 | 1 | 1 | 11          | 0       | 3.1238  | 2.9114    |
| 318 | mp-1009132 | HoBiPd            | 1 | 1 | 1 | 1 | 1 | 1 | 0 | 1 | 1 | 1 | 1 | 1 | 11          | 0       | 5.5263  | 5.3856    |
| 319 | mp-631555  | MnVNi             | 1 | 1 | 1 | 1 | 1 | 1 | 0 | 1 | 1 | 1 | 1 | 1 | 11          | 0       | 5.4372  | 5.3176    |
| 320 | mp-170     | HoCd              | 1 | 1 | 1 | 1 | 1 | 1 | 0 | 1 | 1 | 1 | 1 | 1 | 11          | 0       | 3.1112  | 3.0452    |
| 321 | mp-1009731 | ReC               | 1 | 1 | 1 | 1 | 1 | 1 | 0 | 1 | 1 | 1 | 1 | 1 | 11          | 0       | 9.3175  | 9.3828    |
| 322 | mp-621592  | YPbAu             | 1 | 1 | 1 | 1 | 1 | 1 | 0 | 1 | 1 | 1 | 1 | 1 | 11          | 0       | 5.6869  | 5.3626    |
| 323 | mp-24096   | NdH2              | 1 | 1 | 1 | 1 | 1 | 1 | 0 | 1 | 1 | 1 | 1 | 1 | 11          | 0       | 3.0415  | 3.0047    |
| 324 | mp-12564   | LiSbAu            | 1 | 1 | 1 | 1 | 1 | 1 | 0 | 1 | 1 | 1 | 1 | 1 | 11          | 0       | 3.8734  | 4.055     |
| 325 | mp-1925    | ZrS               | 1 | 1 | 1 | 1 | 1 | 1 | 0 | 1 | 1 | 1 | 1 | 1 | 11          | 0       | 7.487   | 7.7692    |
| 326 | mp-865579  | Li2ErIn           | 1 | 1 | 0 | 1 | 1 | 1 | 1 | 1 | 1 | 1 | 1 | 1 | 11          | 0       | 3.7769  | 3.8581    |
| 327 | mp-510403  | GdSb              | 1 | 1 | 1 | 1 | 1 | 1 | 0 | 1 | 1 | 1 | 1 | 1 | 11          | 0       | 4.8937  | 4.5984    |
| 328 | mp-542065  | CdAgSb            | 1 | 1 | 1 | 1 | 1 | 1 | 0 | 1 | 1 | 1 | 1 | 1 | 11          | 0       | 4.4733  | 4.1606    |
| 329 | mp-1738    | SmAs              | 1 | 1 | 1 | 1 | 1 | 1 | 0 | 1 | 1 | 1 | 1 | 1 | 11          | 0       | 3.7812  | 3.663     |
| 330 | mp-11471   | ScHg              | 1 | 1 | 1 | 1 | 1 | 1 | 0 | 1 | 1 | 1 | 1 | 1 | 11          | 0       | 4.469   | 4.2923    |
| 331 | mp-834     | ThN               | 1 | 1 | 1 | 1 | 1 | 1 | 0 | 1 | 1 | 1 | 1 | 1 | 11          | 0       | 8.4741  | 8.6131    |
| 332 | mp-961679  | TaAlPt            | 1 | 1 | 1 | 1 | 1 | 1 | 0 | 1 | 1 | 1 | 1 | 1 | 11          | 0       | 5.5232  | 5.4099    |
| 333 | mp-721     | TbCd              | 1 | 1 | 1 | 1 | 1 | 1 | 0 | 1 | 1 | 1 | 1 | 1 | 11          | 0       | 3.1198  | 3.1047    |
| 334 | mp-232     | DyRh              | 1 | 1 | 1 | 1 | 1 | 1 | 0 | 1 | 1 | 1 | 1 | 1 | 11          | 0       | 5.1733  | 4.9481    |
| 335 | mp-13308   | HoGeAu            | 1 | 1 | 1 | 1 | 1 | 1 | 0 | 1 | 1 | 1 | 1 | 1 | 11          | 0       | 3.9911  | 3.9146    |
| 336 | mp-1164    | ThC               | 1 | 1 | 1 | 1 | 1 | 1 | 0 | 1 | 1 | 1 | 1 | 1 | 11          | 0       | 7.3285  | 6.9516    |
| 337 | mp-961710  | VSiPt             | 1 | 1 | 1 | 1 | 1 | 1 | 0 | 1 | 1 | 1 | 1 | 1 | 11          | 0       | 7.082   | 7.2823    |
| 338 | mp-1059    | NdCd              | 1 | 1 | 1 | 1 | 1 | 1 | 0 | 1 | 1 | 1 | 1 | 1 | 11          | 0       | 3.1678  | 3.0984    |
| 339 | mp-22907   | DyBi              | 1 | 1 | 1 | 1 | 1 | 1 | 0 | 1 | 1 | 1 | 1 | 1 | 11          | 0       | 4.671   | 4.6575    |
| 340 | mp-2052    | ScAs              | 1 | 1 | 1 | 1 | 1 | 1 | 0 | 1 | 1 | 1 | 1 | 1 | 11          | 0       | 5.0754  | 4.8075    |
| 341 | mp-568398  | CaBiAu            | 1 | 1 | 1 | 1 | 1 | 1 | 0 | 1 | 1 | 1 | 1 | 1 | 11          | 0       | 4.5718  | 4.6605    |
| 342 | mp-865882  | Li2SmIn           | 1 | 1 | 0 | 1 | 1 | 1 | 1 | 1 | 1 | 1 | 1 | 1 | 11          | 0       | 3.6063  | 3.6066    |
| 343 | mp-20952   | TiNiSb            | 1 | 1 | 1 | 1 | 1 | 1 | 0 | 1 | 1 | 1 | 1 | 1 | 11          | 0       | 9.0042  | 8.844     |
| 344 | mp-631754  | ReSnGe            | 1 | 1 | 1 | 1 | 1 | 1 | 0 | 1 | 1 | 1 | 1 | 1 | 11          | 0       | 7.3889  | 7.1367    |
| 345 | mp-1031    | GdCd              | 1 | 1 | 1 | 1 | 1 | 1 | 0 | 1 | 1 | 1 | 1 | 1 | 11          | 0       | 3.1114  | 2.8861    |
| 346 | mp-30413   | TbPbAu            | 1 | 1 | 1 | 1 | 1 | 1 | 0 | 1 | 1 | 1 | 1 | 1 | 11          | 0       | 5.6988  | 5.3247    |
| 347 | mp-568931  | YbNiSb            | 1 | 1 | 1 | 1 | 1 | 1 | 0 | 1 | 1 | 1 | 1 | 1 | 11          | 0       | 5.134   | 5.0064    |

| No. | cif_id     | Crystal structure | A | B | C | D | E | F | G | H | I | J | K | L | Total match | Bandgap | pred_Ef | actual_Ef |
|-----|------------|-------------------|---|---|---|---|---|---|---|---|---|---|---|---|-------------|---------|---------|-----------|
| 348 | mp-2444    | GaRh              | 1 | 1 | 1 | 1 | 1 | 1 | 0 | 1 | 1 | 1 | 1 | 1 | 11          | 0       | 6.5857  | 6.6048    |
| 349 | mp-1008702 | Ti2In             | 1 | 1 | 1 | 1 | 1 | 1 | 0 | 1 | 1 | 1 | 1 | 1 | 11          | 0       | 5.4227  | 5.1408    |
| 350 | mp-979073  | TmMg2Sc           | 1 | 1 | 0 | 1 | 1 | 1 | 1 | 1 | 1 | 1 | 1 | 1 | 11          | 0       | 3.5826  | 3.2528    |
| 351 | mp-978528  | SmMg2Sc           | 1 | 1 | 0 | 1 | 1 | 1 | 1 | 1 | 1 | 1 | 1 | 1 | 11          | 0       | 3.5345  | 3.2945    |
| 352 | mp-22866   | HoBi              | 1 | 1 | 1 | 1 | 1 | 1 | 0 | 1 | 1 | 1 | 1 | 1 | 11          | 0       | 4.5016  | 4.6453    |
| 353 | mp-915     | YCd               | 1 | 1 | 1 | 1 | 1 | 1 | 0 | 1 | 1 | 1 | 1 | 1 | 11          | 0       | 3.1963  | 3.1393    |
| 354 | mp-2443    | DyHg              | 1 | 1 | 1 | 1 | 1 | 1 | 0 | 1 | 1 | 1 | 1 | 1 | 11          | 0       | 3.8865  | 3.8038    |
| 355 | mp-13      | Fe                | 1 | 1 | 1 | 1 | 1 | 1 | 0 | 1 | 1 | 1 | 1 | 1 | 11          | 0       | 5.3824  | 5.2186    |
| 356 | mp-631320  | TcIrOs            | 1 | 1 | 1 | 1 | 1 | 1 | 0 | 1 | 1 | 1 | 1 | 1 | 11          | 0       | 7.3597  | 7.0927    |
| 357 | mp-24092   | GdH2              | 1 | 1 | 1 | 1 | 1 | 1 | 0 | 1 | 1 | 1 | 1 | 1 | 11          | 0       | 3.1051  | 2.8994    |
| 358 | mp-933     | YAs               | 1 | 1 | 1 | 1 | 1 | 1 | 0 | 1 | 1 | 1 | 1 | 1 | 11          | 0       | 3.9698  | 3.998     |
| 359 | mp-574283  | GdTe              | 1 | 1 | 1 | 1 | 1 | 1 | 0 | 1 | 1 | 1 | 1 | 1 | 11          | 0       | 5.7469  | 6.0798    |
| 360 | mp-2082    | Plr2              | 1 | 1 | 1 | 1 | 1 | 1 | 0 | 1 | 1 | 1 | 1 | 1 | 11          | 0       | 9.7965  | 9.5109    |
| 361 | mp-1013733 | Ca3BiSb           | 1 | 1 | 1 | 1 | 1 | 0 | 1 | 1 | 1 | 1 | 1 | 1 | 11          | 0       | 3.1498  | 2.9838    |
| 362 | mp-11242   | DyPbAu            | 1 | 1 | 1 | 1 | 1 | 1 | 0 | 1 | 1 | 1 | 1 | 1 | 11          | 0       | 5.6293  | 5.339     |
| 363 | mp-10755   | TiFeSb            | 1 | 1 | 1 | 1 | 1 | 1 | 0 | 1 | 1 | 1 | 1 | 1 | 11          | 0       | 7.4379  | 7.0863    |
| 364 | mp-961716  | VSnPt             | 1 | 1 | 1 | 1 | 1 | 1 | 0 | 1 | 1 | 1 | 1 | 1 | 11          | 0       | 6.955   | 7.2512    |
| 365 | mp-510374  | GdAs              | 1 | 1 | 1 | 1 | 1 | 1 | 0 | 1 | 1 | 1 | 1 | 1 | 11          | 0       | 3.8974  | 3.6276    |
| 366 | mp-11286   | CaHg              | 1 | 1 | 1 | 1 | 1 | 1 | 0 | 1 | 1 | 1 | 1 | 1 | 11          | 0       | 3.1554  | 3.0196    |
| 367 | mp-631366  | TcSnSe            | 1 | 1 | 1 | 1 | 1 | 0 | 1 | 1 | 1 | 1 | 1 | 1 | 11          | 0       | 6.2673  | 6.1283    |
| 368 | mp-865661  | YbMgCd2           | 1 | 1 | 0 | 1 | 1 | 1 | 1 | 1 | 1 | 1 | 1 | 1 | 11          | 0       | 2.7025  | 2.5413    |
| 369 | mp-961666  | MnNbAs            | 1 | 1 | 1 | 1 | 1 | 1 | 0 | 1 | 1 | 1 | 1 | 1 | 11          | 0       | 5.0412  | 4.9135    |
| 370 | mp-568466  | LiInSn            | 1 | 1 | 1 | 1 | 1 | 1 | 0 | 1 | 1 | 1 | 1 | 1 | 11          | 0       | 5.4723  | 5.499     |
| 371 | mp-20263   | CaIn              | 1 | 1 | 1 | 1 | 1 | 1 | 0 | 1 | 1 | 1 | 1 | 1 | 11          | 0       | 5.2229  | 4.9765    |
| 372 | mp-1092    | HoHg              | 1 | 1 | 1 | 1 | 1 | 1 | 0 | 1 | 1 | 1 | 1 | 1 | 11          | 0       | 3.7961  | 3.7531    |
| 373 | mp-862681  | ErMg3             | 1 | 1 | 0 | 1 | 1 | 1 | 1 | 1 | 1 | 1 | 1 | 1 | 11          | 0       | 3.5619  | 3.3711    |
| 374 | mp-961658  | VFeSe             | 1 | 1 | 1 | 1 | 1 | 1 | 0 | 1 | 1 | 1 | 1 | 1 | 11          | 0       | 7.6305  | 7.4476    |
| 375 | mp-978273  | Mg3Cd             | 1 | 1 | 0 | 1 | 1 | 1 | 1 | 1 | 1 | 1 | 1 | 1 | 11          | 0       | 3.6829  | 3.4504    |
| 376 | mp-11256   | ScAu              | 1 | 1 | 1 | 1 | 1 | 1 | 0 | 1 | 1 | 1 | 1 | 1 | 11          | 0       | 5.4615  | 5.258     |
| 377 | mp-572     | SmCd              | 1 | 1 | 1 | 1 | 1 | 1 | 0 | 1 | 1 | 1 | 1 | 1 | 11          | 0       | 3.0368  | 2.9943    |
| 378 | mp-2795    | ZrC               | 1 | 1 | 1 | 1 | 1 | 1 | 0 | 1 | 1 | 1 | 1 | 1 | 11          | 0       | 5.5106  | 5.4347    |
| 379 | mp-2637    | YSe               | 1 | 1 | 1 | 1 | 1 | 1 | 0 | 1 | 1 | 1 | 1 | 1 | 11          | 0       | 5.6675  | 5.882     |
| 380 | mp-1007    | DySb              | 1 | 1 | 1 | 1 | 1 | 1 | 0 | 1 | 1 | 1 | 1 | 1 | 11          | 0       | 5.1465  | 5.0263    |
| 381 | mp-102     | Co                | 1 | 1 | 1 | 1 | 1 | 1 | 0 | 1 | 1 | 1 | 1 | 1 | 11          | 0       | 5.7004  | 5.4433    |
| 382 | mp-11255   | PrAu              | 1 | 1 | 1 | 1 | 1 | 1 | 0 | 1 | 1 | 1 | 1 | 1 | 11          | 0       | 4.5464  | 4.4923    |
| 383 | mp-22921   | TbBi              | 1 | 1 | 1 | 1 | 1 | 1 | 0 | 1 | 1 | 1 | 1 | 1 | 11          | 0       | 4.6999  | 4.6467    |
| 384 | mp-2781    | ScPd              | 1 | 1 | 1 | 1 | 1 | 1 | 0 | 1 | 1 | 1 | 1 | 1 | 11          | 0       | 5.2341  | 5.1743    |
| 385 | mp-961719  | HfAsRh            | 1 | 1 | 1 | 1 | 1 | 1 | 0 | 1 | 1 | 1 | 1 | 1 | 11          | 0       | 4.6094  | 4.7655    |
| 386 | mp-631526  | SiBPb             | 1 | 1 | 1 | 1 | 1 | 1 | 0 | 1 | 1 | 1 | 1 | 1 | 11          | 0       | 5.5908  | 5.9829    |
| 387 | mp-1006150 | Eu3Re             | 1 | 1 | 0 | 1 | 1 | 1 | 1 | 1 | 1 | 1 | 1 | 1 | 11          | 0       | 3.6723  | 3.6964    |
| 388 | mp-129     | Mo                | 1 | 1 | 1 | 1 | 1 | 1 | 0 | 1 | 1 | 1 | 1 | 1 | 11          | 0       | 8.7109  | 8.4313    |
| 389 | mp-2602    | NdAs              | 1 | 1 | 1 | 1 | 1 | 1 | 0 | 1 | 1 | 1 | 1 | 1 | 11          | 0       | 3.9536  | 3.6034    |
| 390 | mp-23241   | YBi               | 1 | 1 | 1 | 1 | 1 | 1 | 0 | 1 | 1 | 1 | 1 | 1 | 11          | 0       | 4.507   | 4.7053    |
| 391 | mp-24147   | AcH2              | 1 | 1 | 1 | 1 | 1 | 1 | 0 | 1 | 1 | 1 | 1 | 1 | 11          | 0       | 5.3823  | 5.4202    |

| No. | cif_id     | Crystal structure | A | B | C | D | E | F | G | H | I | J | K | L | Total match | Bandgap | pred_Ef | actual_Ef |
|-----|------------|-------------------|---|---|---|---|---|---|---|---|---|---|---|---|-------------|---------|---------|-----------|
| 392 | mp-2281    | SmSb              | 1 | 1 | 1 | 1 | 1 | 1 | 0 | 1 | 1 | 1 | 1 | 1 | 11          | 0       | 4.8393  | 4.763     |
| 393 | mp-2642    | CdAg              | 1 | 1 | 1 | 1 | 1 | 1 | 0 | 1 | 1 | 1 | 1 | 1 | 11          | 0       | 3.3321  | 3.1453    |
| 394 | mp-1902    | MnPd              | 1 | 1 | 1 | 1 | 1 | 1 | 0 | 1 | 1 | 1 | 1 | 1 | 11          | 0       | 5.3416  | 5.001     |
| 395 | mp-571405  | NdTi              | 1 | 1 | 1 | 1 | 1 | 1 | 0 | 1 | 1 | 1 | 1 | 1 | 11          | 0       | 5.6838  | 5.3499    |
| 396 | mp-191     | YRh               | 1 | 1 | 1 | 1 | 1 | 1 | 0 | 1 | 1 | 1 | 1 | 1 | 11          | 0       | 5.0619  | 4.934     |
| 397 | mp-21005   | GdIn              | 1 | 1 | 1 | 1 | 1 | 1 | 0 | 1 | 1 | 1 | 1 | 1 | 11          | 0       | 5.7897  | 5.4105    |
| 398 | mp-510401  | GdP               | 1 | 1 | 1 | 1 | 1 | 1 | 0 | 1 | 1 | 1 | 1 | 1 | 11          | 0       | 4.3296  | 4.1296    |
| 399 | mp-133     | Sb                | 1 | 1 | 1 | 1 | 1 | 1 | 0 | 1 | 1 | 1 | 1 | 1 | 11          | 0       | 7.4967  | 7.1582    |
| 400 | mp-1008734 | ThH2              | 1 | 1 | 1 | 1 | 1 | 1 | 0 | 1 | 1 | 1 | 1 | 1 | 11          | 0       | 7.0958  | 6.7238    |
| 401 | mp-1623    | ErS               | 1 | 1 | 1 | 1 | 1 | 1 | 0 | 1 | 1 | 1 | 1 | 1 | 11          | 0       | 7.0763  | 6.7264    |
| 402 | mp-30      | Cu                | 1 | 1 | 1 | 1 | 1 | 1 | 0 | 1 | 1 | 1 | 1 | 1 | 11          | 0       | 7.2356  | 6.8571    |
| 403 | mp-2399    | YHg               | 1 | 1 | 1 | 1 | 1 | 1 | 0 | 1 | 1 | 1 | 1 | 1 | 11          | 0       | 3.853   | 3.8157    |
| 404 | mp-377     | LuRh              | 1 | 1 | 1 | 1 | 1 | 1 | 0 | 1 | 1 | 1 | 1 | 1 | 11          | 0       | 4.9902  | 4.9321    |
| 405 | mp-1009222 | MnTe              | 1 | 1 | 1 | 1 | 1 | 1 | 0 | 1 | 1 | 1 | 1 | 1 | 11          | 0       | 3.2806  | 3.5504    |
| 406 | mp-865580  | Li2DyIn           | 1 | 1 | 0 | 1 | 1 | 1 | 1 | 1 | 1 | 1 | 1 | 1 | 11          | 0       | 3.788   | 3.7969    |
| 407 | mp-961677  | TaGaPt            | 1 | 1 | 1 | 1 | 1 | 1 | 0 | 1 | 1 | 1 | 1 | 1 | 11          | 0       | 4.6004  | 4.4598    |
| 408 | mp-20298   | SmIn              | 1 | 1 | 1 | 1 | 1 | 1 | 0 | 1 | 1 | 1 | 1 | 1 | 11          | 0       | 5.7512  | 5.5601    |
| 409 | mp-867     | ErCd              | 1 | 1 | 1 | 1 | 1 | 1 | 0 | 1 | 1 | 1 | 1 | 1 | 11          | 0       | 3.1465  | 3.0782    |
| 410 | mp-20012   | InSb              | 1 | 1 | 1 | 1 | 1 | 1 | 1 | 1 | 1 | 0 | 1 | 1 | 11          | 0       | 4.0818  | 4.3194    |
| 411 | mp-542583  | EuTe              | 1 | 1 | 1 | 1 | 1 | 1 | 0 | 1 | 1 | 1 | 1 | 1 | 11          | 0       | 4.4228  | 4.5791    |
| 412 | mp-1009543 | DyBiPd            | 1 | 1 | 1 | 1 | 1 | 1 | 0 | 1 | 1 | 1 | 1 | 1 | 11          | 0       | 5.6198  | 5.376     |
| 413 | mp-1787    | NdMg3             | 1 | 1 | 0 | 1 | 1 | 1 | 1 | 1 | 1 | 1 | 1 | 1 | 11          | 0       | 3.5359  | 3.4389    |
| 414 | mp-11561   | TbRh              | 1 | 1 | 1 | 1 | 1 | 1 | 0 | 1 | 1 | 1 | 1 | 1 | 11          | 0       | 5.0358  | 4.9615    |
| 415 | mp-1008624 | YBiPd             | 1 | 1 | 1 | 1 | 1 | 1 | 0 | 1 | 1 | 1 | 1 | 1 | 11          | 0       | 5.425   | 5.3985    |
| 416 | mp-15694   | PaAs              | 1 | 1 | 1 | 1 | 1 | 1 | 0 | 1 | 1 | 1 | 1 | 1 | 11          | 0       | 9.1347  | 9.0277    |
| 417 | mp-506     | MgPd              | 1 | 1 | 1 | 1 | 1 | 1 | 0 | 1 | 1 | 1 | 1 | 1 | 11          | 0       | 5.0661  | 4.9127    |
| 418 | mp-11495   | LuRu              | 1 | 1 | 1 | 1 | 1 | 1 | 0 | 1 | 1 | 1 | 1 | 1 | 11          | 0       | 5.0151  | 4.6559    |
| 419 | mp-631538  | NiBiB             | 1 | 1 | 1 | 1 | 1 | 1 | 0 | 1 | 1 | 1 | 1 | 1 | 11          | 0       | 7.3628  | 7.0516    |
| 420 | mp-981545  | Ho3Zr             | 1 | 1 | 0 | 1 | 1 | 1 | 1 | 1 | 1 | 1 | 1 | 1 | 11          | 0       | 3.5218  | 3.3714    |
| 421 | mp-984713  | Dy3Ga             | 1 | 1 | 0 | 1 | 1 | 1 | 1 | 1 | 1 | 1 | 1 | 1 | 11          | 0       | 3.7467  | 3.4778    |
| 422 | mp-2090    | FeCo              | 1 | 1 | 1 | 1 | 1 | 1 | 0 | 1 | 1 | 1 | 1 | 1 | 11          | 0       | 5.815   | 5.6096    |
| 423 | mp-866196  | Li2PrIn           | 1 | 1 | 0 | 1 | 1 | 1 | 1 | 1 | 1 | 1 | 1 | 1 | 11          | 0       | 3.7108  | 3.6045    |
| 424 | mp-866199  | AcAg              | 1 | 1 | 1 | 1 | 1 | 1 | 0 | 1 | 1 | 1 | 1 | 1 | 11          | 0       | 5.3626  | 5.4226    |
| 425 | mp-961718  | TiAsRh            | 1 | 1 | 1 | 1 | 1 | 1 | 0 | 1 | 1 | 1 | 1 | 1 | 11          | 0       | 5.5651  | 5.6778    |
| 426 | mp-2520    | TmSb              | 1 | 1 | 1 | 1 | 1 | 1 | 0 | 1 | 1 | 1 | 1 | 1 | 11          | 0       | 4.9082  | 5.1036    |
| 427 | mp-11374   | DyTi              | 1 | 1 | 1 | 1 | 1 | 1 | 0 | 1 | 1 | 1 | 1 | 1 | 11          | 0       | 5.7799  | 5.6909    |
| 428 | mp-2350    | LaS               | 1 | 1 | 1 | 1 | 1 | 1 | 0 | 1 | 1 | 1 | 1 | 1 | 11          | 0       | 9.0285  | 8.8139    |
| 429 | mp-862930  | Li2PmIn           | 1 | 1 | 0 | 1 | 1 | 1 | 1 | 1 | 1 | 1 | 1 | 1 | 11          | 0       | 3.7667  | 3.5909    |
| 430 | mp-2191    | ErSb              | 1 | 1 | 1 | 1 | 1 | 1 | 0 | 1 | 1 | 1 | 1 | 1 | 11          | 0       | 5.2548  | 5.0951    |
| 431 | mp-1093    | ThGe              | 1 | 1 | 1 | 1 | 1 | 1 | 0 | 1 | 1 | 1 | 1 | 1 | 11          | 0       | 4.918   | 5.0499    |
| 432 | mp-2627    | DyAs              | 1 | 1 | 1 | 1 | 1 | 1 | 0 | 1 | 1 | 1 | 1 | 1 | 11          | 0       | 3.7993  | 3.8924    |
| 433 | mp-24658   | SmH2              | 1 | 1 | 1 | 1 | 1 | 1 | 0 | 1 | 1 | 1 | 1 | 1 | 11          | 0       | 3.059   | 2.9611    |
| 434 | mp-646     | PrCd              | 1 | 1 | 1 | 1 | 1 | 1 | 0 | 1 | 1 | 1 | 1 | 1 | 11          | 0       | 3.051   | 3.1736    |
| 435 | mp-2381    | ErRh              | 1 | 1 | 1 | 1 | 1 | 1 | 0 | 1 | 1 | 1 | 1 | 1 | 11          | 0       | 5.0866  | 4.923     |



| No. | cif_id     | Crystal structure | A | B | C | D | E | F | G | H | I | J | K | L | Total match | Bandgap | pred_Ef | actual_Ef |
|-----|------------|-------------------|---|---|---|---|---|---|---|---|---|---|---|---|-------------|---------|---------|-----------|
| 436 | mp-10622   | PrAs              | 1 | 1 | 1 | 1 | 1 | 1 | 0 | 1 | 1 | 1 | 1 | 1 | 11          | 0       | 3.9728  | 3.6191    |
| 437 | mp-20997   | InNi              | 1 | 1 | 1 | 1 | 1 | 1 | 0 | 1 | 1 | 1 | 1 | 1 | 11          | 0       | 9.7164  | 9.6157    |
| 438 | mp-2065    | MnS               | 1 | 1 | 1 | 1 | 1 | 1 | 0 | 1 | 1 | 1 | 1 | 1 | 11          | 0       | 5.7697  | 6.0307    |
| 439 | mp-979950  | AcYbMg2           | 1 | 1 | 0 | 1 | 1 | 1 | 1 | 1 | 1 | 1 | 1 | 1 | 11          | 0       | 3.5568  | 3.4829    |
| 440 | mp-30389   | HoPbAu            | 1 | 1 | 1 | 1 | 1 | 1 | 0 | 1 | 1 | 1 | 1 | 1 | 11          | 0       | 5.6858  | 5.3528    |
| 441 | mp-1534    | YS                | 1 | 1 | 1 | 1 | 1 | 1 | 0 | 1 | 1 | 1 | 1 | 1 | 11          | 0       | 6.8449  | 6.6989    |
| 442 | mp-631302  | ScVFe             | 1 | 1 | 1 | 1 | 1 | 1 | 0 | 1 | 1 | 1 | 1 | 1 | 11          | 0       | 4.8414  | 4.5206    |
| 443 | mp-2212    | ScCo              | 1 | 1 | 1 | 1 | 1 | 1 | 0 | 1 | 1 | 1 | 1 | 1 | 11          | 0       | 5.401   | 5.0701    |
| 444 | mp-24154   | NbH2              | 1 | 1 | 1 | 1 | 1 | 1 | 0 | 1 | 1 | 1 | 1 | 1 | 11          | 0       | 5.5119  | 5.1812    |
| 445 | mp-866181  | Li2NdIn           | 1 | 1 | 0 | 1 | 1 | 1 | 1 | 1 | 1 | 1 | 1 | 1 | 11          | 0       | 3.7302  | 3.596     |
| 446 | mp-23234   | TmBi              | 1 | 1 | 1 | 1 | 1 | 1 | 0 | 1 | 1 | 1 | 1 | 1 | 11          | 0       | 4.6163  | 4.6993    |
| 447 | mp-11621   | ZnNiSb            | 1 | 1 | 1 | 1 | 1 | 1 | 0 | 1 | 1 | 1 | 1 | 1 | 11          | 0       | 6.9728  | 6.6777    |
| 448 | mp-364     | AlRh              | 1 | 1 | 1 | 1 | 1 | 1 | 0 | 1 | 1 | 1 | 1 | 1 | 11          | 0       | 9.3289  | 8.9573    |
| 449 | mp-13496   | ZrPd              | 1 | 1 | 1 | 1 | 1 | 1 | 0 | 1 | 1 | 1 | 1 | 1 | 11          | 0       | 5.2784  | 5.1342    |
| 450 | mp-570632  | ScBi              | 1 | 1 | 1 | 1 | 1 | 1 | 0 | 1 | 1 | 1 | 1 | 1 | 11          | 0       | 5.458   | 5.359     |
| 451 | mp-1169    | ScCu              | 1 | 1 | 1 | 1 | 1 | 1 | 0 | 1 | 1 | 1 | 1 | 1 | 11          | 0       | 5.6319  | 5.2973    |
| 452 | mp-645     | TbP               | 1 | 1 | 1 | 1 | 1 | 1 | 0 | 1 | 1 | 1 | 1 | 1 | 11          | 0       | 4.4616  | 4.3457    |
| 453 | mp-631364  | TaOsPb            | 1 | 1 | 1 | 1 | 1 | 1 | 0 | 1 | 1 | 1 | 1 | 1 | 11          | 0       | 6.5984  | 6.3135    |
| 454 | mp-1941    | GaNi              | 1 | 1 | 1 | 1 | 1 | 1 | 0 | 1 | 1 | 1 | 1 | 1 | 11          | 0       | 6.9143  | 6.9123    |
| 455 | mp-215     | YSb               | 1 | 1 | 1 | 1 | 1 | 1 | 0 | 1 | 1 | 1 | 1 | 1 | 11          | 0       | 5.2865  | 5.0871    |
| 456 | mp-11564   | TmRh              | 1 | 1 | 1 | 1 | 1 | 1 | 0 | 1 | 1 | 1 | 1 | 1 | 11          | 0       | 4.9327  | 4.8988    |
| 457 | mp-977386  | LiLu2Tc           | 1 | 1 | 0 | 1 | 1 | 1 | 1 | 1 | 1 | 1 | 1 | 1 | 11          | 0       | 3.5411  | 3.2563    |
| 458 | mp-1008903 | MgAgSb            | 1 | 1 | 1 | 1 | 1 | 1 | 0 | 1 | 1 | 1 | 1 | 1 | 11          | 0       | 5.1877  | 5.2523    |
| 459 | mp-2379    | CoSi2             | 1 | 1 | 1 | 1 | 1 | 1 | 0 | 1 | 1 | 1 | 1 | 1 | 11          | 0       | 8.9969  | 8.6951    |
| 460 | mp-631342  | MnTcPd            | 1 | 1 | 1 | 1 | 1 | 1 | 0 | 1 | 1 | 1 | 1 | 1 | 11          | 0       | 5.3682  | 4.9947    |
| 461 | mp-515     | TmTl              | 1 | 1 | 1 | 1 | 1 | 1 | 0 | 1 | 1 | 1 | 1 | 1 | 11          | 0       | 5.8179  | 5.7586    |
| 462 | mp-2828    | HfN               | 1 | 1 | 1 | 1 | 1 | 1 | 0 | 1 | 1 | 1 | 1 | 1 | 11          | 0       | 7.9435  | 8.2721    |
| 463 | mp-994     | YP                | 1 | 1 | 1 | 1 | 1 | 1 | 0 | 1 | 1 | 1 | 1 | 1 | 11          | 0       | 4.5482  | 4.4436    |
| 464 | mp-961648  | KBaP              | 1 | 1 | 1 | 1 | 1 | 1 | 0 | 1 | 1 | 0 | 1 | 1 | 10          | 1.1622  | 2.0358  | 1.9643    |
| 465 | mp-961713  | ZrSnPt            | 1 | 1 | 1 | 1 | 1 | 1 | 0 | 1 | 1 | 0 | 1 | 1 | 10          | 0.9628  | 6.6782  | 6.2904    |
| 466 | mp-961678  | ScCoTe            | 1 | 1 | 1 | 1 | 1 | 1 | 0 | 1 | 1 | 0 | 1 | 1 | 10          | 0.8678  | 7.5606  | 7.3586    |
| 467 | mp-962072  | KYSn              | 1 | 0 | 0 | 1 | 1 | 1 | 1 | 1 | 1 | 1 | 1 | 1 | 10          | 0.7193  | 2.7879  | 2.5032    |
| 468 | mp-9124    | LiZnAs            | 1 | 1 | 1 | 1 | 1 | 1 | 0 | 1 | 1 | 0 | 1 | 1 | 10          | 0.5475  | 2.5804  | 2.6476    |
| 469 | mp-961682  | TiSnPd            | 1 | 1 | 1 | 1 | 1 | 1 | 0 | 1 | 1 | 0 | 1 | 1 | 10          | 0.4691  | 6.8067  | 6.4978    |
| 470 | mp-961646  | TiTeOs            | 1 | 1 | 1 | 1 | 1 | 1 | 0 | 1 | 1 | 0 | 1 | 1 | 10          | 0.4298  | 7.7281  | 7.6784    |
| 471 | mp-570213  | LiMgBi            | 1 | 0 | 0 | 1 | 1 | 1 | 1 | 1 | 1 | 1 | 1 | 1 | 10          | 0.3619  | 2.8396  | 2.8871    |
| 472 | mp-22786   | ThNiSn            | 1 | 1 | 1 | 1 | 1 | 1 | 0 | 1 | 1 | 0 | 1 | 1 | 10          | 0.2714  | 7.5183  | 7.2697    |
| 473 | mp-1266    | Na2Se             | 1 | 1 | 0 | 1 | 1 | 1 | 1 | 1 | 0 | 1 | 1 | 1 | 10          | 2.0162  | -0.0105 | -0.0028   |
| 474 | mp-1958    | SrTe              | 1 | 0 | 1 | 1 | 1 | 1 | 0 | 1 | 1 | 1 | 1 | 1 | 10          | 1.7623  | 2.8976  | 2.6887    |
| 475 | mp-2172    | AlAs              | 1 | 1 | 1 | 1 | 1 | 1 | 0 | 1 | 1 | 0 | 1 | 1 | 10          | 1.5037  | 3.7511  | 3.5939    |
| 476 | mp-22895   | CuI               | 1 | 1 | 1 | 1 | 0 | 1 | 0 | 1 | 1 | 1 | 1 | 1 | 10          | 1.1363  | 4.476   | 4.2801    |
| 477 | mp-4025    | TmNiSb            | 1 | 1 | 1 | 1 | 1 | 1 | 0 | 1 | 1 | 0 | 1 | 1 | 10          | 0.2527  | 6.8923  | 6.6101    |
| 478 | mp-20185   | LuNiSb            | 1 | 1 | 1 | 1 | 1 | 1 | 0 | 1 | 1 | 0 | 1 | 1 | 10          | 0.2159  | 6.9857  | 6.7164    |
| 479 | mp-30459   | ScNiBi            | 1 | 1 | 1 | 1 | 1 | 1 | 0 | 1 | 1 | 0 | 1 | 1 | 10          | 0.1844  | 6.9345  | 6.7971    |

| No. | cif_id     | Crystal structure | A | B | C | D | E | F | G | H | I | J | K | L | Total match | Bandgap | pred_Ef | actual_Ef |
|-----|------------|-------------------|---|---|---|---|---|---|---|---|---|---|---|---|-------------|---------|---------|-----------|
| 480 | mp-19962   | Sn2Pt             | 1 | 1 | 1 | 1 | 1 | 1 | 0 | 1 | 1 | 0 | 1 | 1 | 10          | 0       | 8.3125  | 8.0068    |
| 481 | mp-20305   | InAs              | 1 | 1 | 1 | 1 | 1 | 1 | 0 | 1 | 1 | 0 | 1 | 1 | 10          | 0       | 3.8811  | 3.7986    |
| 482 | mp-10183   | MgSbPd            | 1 | 1 | 1 | 1 | 1 | 1 | 0 | 1 | 1 | 0 | 1 | 1 | 10          | 0       | 5.9122  | 5.6783    |
| 483 | mp-867811  | TaMnRu2           | 1 | 1 | 0 | 1 | 0 | 1 | 1 | 1 | 1 | 1 | 1 | 1 | 10          | 0       | 7.1489  | 6.7668    |
| 484 | mp-20340   | EuN               | 1 | 1 | 1 | 1 | 1 | 1 | 0 | 1 | 1 | 0 | 1 | 1 | 10          | 0       | 3.2865  | 3.0567    |
| 485 | mp-1002114 | VH                | 1 | 1 | 1 | 1 | 1 | 1 | 0 | 1 | 1 | 0 | 1 | 1 | 10          | 0       | 6.6927  | 6.3637    |
| 486 | mp-11488   | LaTl              | 1 | 1 | 1 | 1 | 1 | 1 | 0 | 1 | 1 | 0 | 1 | 1 | 10          | 0       | 7.8989  | 7.6632    |
| 487 | mp-11573   | TiTc              | 1 | 1 | 1 | 1 | 1 | 1 | 0 | 1 | 1 | 0 | 1 | 1 | 10          | 0       | 7.3182  | 7.1488    |
| 488 | mp-1086    | TaC               | 1 | 1 | 1 | 1 | 1 | 1 | 0 | 1 | 1 | 0 | 1 | 1 | 10          | 0       | 8.569   | 8.2251    |
| 489 | mp-11258   | TbAu              | 1 | 1 | 1 | 1 | 1 | 1 | 0 | 1 | 1 | 0 | 1 | 1 | 10          | 0       | 4.8195  | 4.6289    |
| 490 | mp-30455   | HoBiPt            | 1 | 1 | 1 | 1 | 1 | 1 | 0 | 1 | 1 | 0 | 1 | 1 | 10          | 0       | 5.9127  | 5.6678    |
| 491 | mp-865843  | YbNdZn2           | 1 | 0 | 0 | 1 | 1 | 1 | 1 | 1 | 1 | 1 | 1 | 1 | 10          | 0       | 2.867   | 2.6528    |
| 492 | mp-8638    | Tc                | 1 | 1 | 1 | 1 | 1 | 1 | 0 | 1 | 1 | 0 | 1 | 1 | 10          | 0       | 8.6361  | 8.4034    |
| 493 | mp-592     | TiRu              | 1 | 1 | 1 | 1 | 1 | 1 | 0 | 1 | 1 | 0 | 1 | 1 | 10          | 0       | 7.8551  | 7.6303    |
| 494 | mp-1101    | TmAs              | 1 | 1 | 1 | 1 | 1 | 1 | 0 | 1 | 1 | 0 | 1 | 1 | 10          | 0       | 4.2202  | 3.9088    |
| 495 | mp-1144    | ErP               | 1 | 1 | 1 | 1 | 1 | 1 | 0 | 1 | 1 | 0 | 1 | 1 | 10          | 0       | 4.4922  | 4.3845    |
| 496 | mp-39      | Tl                | 1 | 1 | 1 | 1 | 1 | 1 | 0 | 1 | 1 | 0 | 1 | 1 | 10          | 0       | 5.7307  | 5.7592    |
| 497 | mp-24153   | LaH2              | 1 | 1 | 1 | 1 | 1 | 1 | 0 | 1 | 1 | 0 | 1 | 1 | 10          | 0       | 6.6201  | 6.4422    |
| 498 | mp-631301  | HgPRh             | 1 | 1 | 1 | 1 | 1 | 1 | 0 | 1 | 1 | 0 | 1 | 1 | 10          | 0       | 4.372   | 4.1854    |
| 499 | mp-2186    | NpAs              | 1 | 1 | 1 | 1 | 1 | 1 | 0 | 1 | 1 | 0 | 1 | 1 | 10          | 0       | 8.8758  | 8.6164    |
| 500 | mp-972352  | YbMg              | 1 | 1 | 1 | 1 | 1 | 1 | 0 | 1 | 1 | 0 | 1 | 1 | 10          | 0       | 2.1738  | 1.973     |
| 501 | mp-867224  | CaNdCd2           | 1 | 0 | 0 | 1 | 1 | 1 | 1 | 1 | 1 | 1 | 1 | 1 | 10          | 0       | 2.8818  | 2.7974    |
| 502 | mp-861892  | DyInRh2           | 1 | 1 | 0 | 1 | 0 | 1 | 1 | 1 | 1 | 1 | 1 | 1 | 10          | 0       | 7.1763  | 6.8642    |
| 503 | mp-41      | Zr                | 1 | 1 | 1 | 1 | 1 | 1 | 0 | 1 | 1 | 0 | 1 | 1 | 10          | 0       | 4.2678  | 4.1525    |
| 504 | mp-865471  | VGaTc2            | 1 | 1 | 0 | 1 | 0 | 1 | 1 | 1 | 1 | 1 | 1 | 1 | 10          | 0       | 7.2677  | 6.9201    |
| 505 | mp-2197    | BaHg              | 1 | 1 | 1 | 1 | 1 | 1 | 0 | 1 | 1 | 0 | 1 | 1 | 10          | 0       | 2.1413  | 2.4789    |
| 506 | mp-962073  | KBaSn             | 1 | 1 | 1 | 1 | 1 | 1 | 0 | 1 | 1 | 0 | 1 | 1 | 10          | 0       | 2.2929  | 2.0259    |
| 507 | mp-1009217 | MnSb              | 1 | 1 | 1 | 1 | 1 | 1 | 0 | 1 | 1 | 0 | 1 | 1 | 10          | 0       | 6.8763  | 6.654     |
| 508 | mp-980006  | Yb3Os             | 1 | 1 | 0 | 1 | 0 | 1 | 1 | 1 | 1 | 1 | 1 | 1 | 10          | 0       | 3.1191  | 3.3668    |
| 509 | mp-1009131 | MnAs              | 1 | 1 | 1 | 1 | 1 | 1 | 0 | 1 | 1 | 0 | 1 | 1 | 10          | 0       | 3.1289  | 2.862     |
| 510 | mp-977409  | NbTc2Ge           | 1 | 1 | 0 | 1 | 0 | 1 | 1 | 1 | 1 | 1 | 1 | 1 | 10          | 0       | 7.3043  | 7.0512    |
| 511 | mp-1073    | CaCd              | 1 | 1 | 1 | 1 | 1 | 1 | 0 | 1 | 1 | 0 | 1 | 1 | 10          | 0       | 2.4777  | 2.4264    |
| 512 | mp-519     | USb               | 1 | 1 | 1 | 1 | 1 | 1 | 0 | 1 | 1 | 0 | 1 | 1 | 10          | 0       | 8.8383  | 8.5018    |
| 513 | mp-1172    | MgRh              | 1 | 1 | 1 | 1 | 1 | 1 | 0 | 1 | 1 | 0 | 1 | 1 | 10          | 0       | 5.3385  | 5.0274    |
| 514 | mp-571     | TiNi              | 1 | 1 | 1 | 1 | 1 | 1 | 0 | 1 | 1 | 0 | 1 | 1 | 10          | 0       | 7.6396  | 7.2451    |
| 515 | mp-4076    | VCoSb             | 1 | 1 | 1 | 1 | 1 | 1 | 0 | 1 | 1 | 0 | 1 | 1 | 10          | 0       | 8.3316  | 7.9606    |
| 516 | mp-1009079 | CrTe              | 1 | 1 | 1 | 1 | 1 | 1 | 0 | 1 | 1 | 0 | 1 | 1 | 10          | 0       | 6.7209  | 6.4731    |
| 517 | mp-2442    | ErAu              | 1 | 1 | 1 | 1 | 1 | 1 | 0 | 1 | 1 | 0 | 1 | 1 | 10          | 0       | 4.7633  | 4.5573    |
| 518 | mp-976793  | LiEr2Ga           | 1 | 0 | 0 | 1 | 1 | 1 | 1 | 1 | 1 | 1 | 1 | 1 | 10          | 0       | 2.7248  | 2.7743    |
| 519 | mp-866157  | TiGaRh2           | 1 | 1 | 0 | 1 | 0 | 1 | 1 | 1 | 1 | 1 | 1 | 1 | 10          | 0       | 7.2172  | 7.0602    |
| 520 | mp-2012    | LiHg              | 1 | 1 | 1 | 1 | 1 | 1 | 0 | 1 | 1 | 0 | 1 | 1 | 10          | 0       | 2.273   | 2.1955    |
| 521 | mp-85      | In                | 1 | 1 | 1 | 1 | 1 | 1 | 0 | 1 | 1 | 0 | 1 | 1 | 10          | 0       | 6.919   | 6.8952    |
| 522 | mp-985806  | Al2Cu             | 1 | 1 | 1 | 1 | 1 | 1 | 0 | 1 | 1 | 0 | 1 | 1 | 10          | 0       | 7.0513  | 6.7848    |
| 523 | mp-631468  | SrScBe            | 1 | 1 | 1 | 1 | 1 | 1 | 0 | 1 | 1 | 0 | 1 | 1 | 10          | 0       | 2.1018  | 1.9807    |

| No. | cif_id     | Crystal structure | A | B | C | D | E | F | G | H | I | J | K | L | Total match | Bandgap | pred_Ef | actual_Ef |
|-----|------------|-------------------|---|---|---|---|---|---|---|---|---|---|---|---|-------------|---------|---------|-----------|
| 524 | mp-979259  | V2ReMo            | 1 | 1 | 0 | 1 | 0 | 1 | 1 | 1 | 1 | 1 | 1 | 1 | 10          | 0       | 7.2644  | 7.0814    |
| 525 | mp-984791  | CaTmCd2           | 1 | 0 | 0 | 1 | 1 | 1 | 1 | 1 | 1 | 1 | 1 | 1 | 10          | 0       | 2.9163  | 2.7805    |
| 526 | mp-1009206 | MnSn              | 1 | 1 | 1 | 1 | 1 | 1 | 0 | 1 | 1 | 0 | 1 | 1 | 10          | 0       | 8.8128  | 8.4866    |
| 527 | mp-2       | Pd                | 1 | 1 | 1 | 1 | 1 | 1 | 0 | 1 | 1 | 0 | 1 | 1 | 10          | 0       | 4.3412  | 4.4097    |
| 528 | mp-2743    | LiPd              | 1 | 1 | 1 | 1 | 1 | 1 | 0 | 1 | 1 | 0 | 1 | 1 | 10          | 0       | 2.5516  | 2.4585    |
| 529 | mp-1009207 | MnSb              | 1 | 1 | 1 | 1 | 1 | 1 | 0 | 1 | 1 | 0 | 1 | 1 | 10          | 0       | 8.472   | 8.2256    |
| 530 | mp-981384  | ScOs3             | 1 | 1 | 0 | 1 | 0 | 1 | 1 | 1 | 1 | 1 | 1 | 1 | 10          | 0       | 7.2469  | 7.0026    |
| 531 | mp-1688    | ErAs              | 1 | 1 | 1 | 1 | 1 | 1 | 0 | 1 | 1 | 0 | 1 | 1 | 10          | 0       | 4.1383  | 3.9159    |
| 532 | mp-284     | AlCo              | 1 | 1 | 1 | 1 | 1 | 1 | 0 | 1 | 1 | 0 | 1 | 1 | 10          | 0       | 8.5392  | 8.3049    |
| 533 | mp-980052  | Yb3In             | 1 | 0 | 0 | 1 | 1 | 1 | 1 | 1 | 1 | 1 | 1 | 1 | 10          | 0       | 2.726   | 2.9783    |
| 534 | mp-980062  | YbErZn2           | 1 | 0 | 0 | 1 | 1 | 1 | 1 | 1 | 1 | 1 | 1 | 1 | 10          | 0       | 2.7611  | 2.5707    |
| 535 | mp-604453  | CeBiPd            | 1 | 1 | 1 | 1 | 1 | 1 | 0 | 1 | 1 | 0 | 1 | 1 | 10          | 0       | 6.9418  | 6.5488    |
| 536 | mp-31459   | TaCoSb            | 1 | 1 | 1 | 1 | 1 | 1 | 0 | 1 | 1 | 0 | 1 | 1 | 10          | 0       | 8.2165  | 8.5572    |
| 537 | mp-22320   | GaRu              | 1 | 1 | 1 | 1 | 1 | 1 | 0 | 1 | 1 | 0 | 1 | 1 | 10          | 0       | 6.6381  | 6.4373    |
| 538 | mp-631515  | CaHfZn            | 1 | 1 | 1 | 1 | 1 | 1 | 0 | 1 | 1 | 0 | 1 | 1 | 10          | 0       | 2.5109  | 2.5015    |
| 539 | mp-1009264 | NbCo              | 1 | 1 | 1 | 1 | 1 | 1 | 0 | 1 | 1 | 0 | 1 | 1 | 10          | 0       | 5.7025  | 5.5509    |
| 540 | mp-21215   | InPd              | 1 | 1 | 1 | 1 | 1 | 1 | 0 | 1 | 1 | 0 | 1 | 1 | 10          | 0       | 8.2624  | 8.0576    |
| 541 | mp-865992  | YbSnRh2           | 1 | 1 | 0 | 1 | 0 | 1 | 1 | 1 | 1 | 1 | 1 | 1 | 10          | 0       | 7.1259  | 7.0727    |
| 542 | mp-979939  | Yb3W              | 1 | 1 | 0 | 1 | 0 | 1 | 1 | 1 | 1 | 1 | 1 | 1 | 10          | 0       | 2.6725  | 2.6853    |
| 543 | mp-1610    | TbS               | 1 | 1 | 1 | 1 | 1 | 1 | 0 | 1 | 1 | 0 | 1 | 1 | 10          | 0       | 6.7187  | 6.6019    |
| 544 | mp-864620  | CaSmCd2           | 1 | 0 | 0 | 1 | 1 | 1 | 1 | 1 | 1 | 1 | 1 | 1 | 10          | 0       | 2.8426  | 2.7516    |
| 545 | mp-11375   | EuHg              | 1 | 0 | 1 | 1 | 1 | 1 | 0 | 1 | 1 | 1 | 1 | 1 | 10          | 0       | 2.8454  | 2.9072    |
| 546 | mp-926     | PuP               | 1 | 1 | 1 | 1 | 1 | 1 | 0 | 1 | 1 | 0 | 1 | 1 | 10          | 0       | 9.3065  | 8.9739    |
| 547 | mp-829     | AlPd              | 1 | 1 | 1 | 1 | 1 | 1 | 0 | 1 | 1 | 0 | 1 | 1 | 10          | 0       | 7.9077  | 7.7534    |
| 548 | mp-8642    | Re                | 1 | 1 | 1 | 1 | 1 | 1 | 0 | 1 | 1 | 0 | 1 | 1 | 10          | 0       | 7.7739  | 7.4711    |
| 549 | mp-1008926 | CrTe              | 1 | 1 | 1 | 1 | 1 | 1 | 0 | 1 | 1 | 0 | 1 | 1 | 10          | 0       | 3.9949  | 3.8599    |
| 550 | mp-1912    | ZnAg              | 1 | 1 | 1 | 1 | 1 | 1 | 0 | 1 | 1 | 0 | 1 | 1 | 10          | 0       | 3.3466  | 3.4195    |
| 551 | mp-1018074 | GaFeNi2           | 1 | 1 | 0 | 1 | 0 | 1 | 1 | 1 | 1 | 1 | 1 | 1 | 10          | 0       | 7.158   | 6.7585    |
| 552 | mp-980947  | SrCaHg2           | 1 | 0 | 0 | 1 | 1 | 1 | 1 | 1 | 1 | 1 | 1 | 1 | 10          | 0       | 2.8683  | 2.7672    |
| 553 | mp-1002122 | HfIr              | 1 | 1 | 1 | 1 | 1 | 1 | 0 | 1 | 1 | 0 | 1 | 1 | 10          | 0       | 7.8337  | 7.4415    |
| 554 | mp-2545    | YbHg              | 1 | 1 | 1 | 1 | 1 | 1 | 0 | 1 | 1 | 0 | 1 | 1 | 10          | 0       | 2.5723  | 2.6373    |
| 555 | mp-7171    | TmP               | 1 | 1 | 1 | 1 | 1 | 1 | 0 | 1 | 1 | 0 | 1 | 1 | 10          | 0       | 4.5311  | 4.3817    |
| 556 | mp-2493    | CeN               | 1 | 1 | 1 | 1 | 1 | 1 | 0 | 1 | 1 | 0 | 1 | 1 | 10          | 0       | 8.7606  | 8.6302    |
| 557 | mp-864883  | MgSnPd2           | 1 | 1 | 0 | 1 | 0 | 1 | 1 | 1 | 1 | 1 | 1 | 1 | 10          | 0       | 7.2126  | 7.0531    |
| 558 | mp-832     | HoPd              | 1 | 1 | 1 | 1 | 1 | 1 | 0 | 1 | 1 | 0 | 1 | 1 | 10          | 0       | 4.6041  | 4.4118    |
| 559 | mp-631452  | NbCrW             | 1 | 1 | 1 | 0 | 1 | 1 | 0 | 1 | 1 | 1 | 1 | 1 | 10          | 0       | 4.6635  | 4.3453    |
| 560 | mp-864734  | HfInPd2           | 1 | 1 | 0 | 1 | 0 | 1 | 1 | 1 | 1 | 1 | 1 | 1 | 10          | 0       | 7.3103  | 6.9487    |
| 561 | mp-980049  | Yb3Re             | 1 | 0 | 0 | 1 | 1 | 1 | 1 | 1 | 1 | 1 | 1 | 1 | 10          | 0       | 2.8847  | 2.7422    |
| 562 | mp-11261   | YAu               | 1 | 1 | 1 | 1 | 1 | 1 | 0 | 1 | 1 | 0 | 1 | 1 | 10          | 0       | 4.7553  | 4.6004    |
| 563 | mp-2226    | DyPd              | 1 | 1 | 1 | 1 | 1 | 1 | 0 | 1 | 1 | 0 | 1 | 1 | 10          | 0       | 4.7989  | 4.4696    |
| 564 | mp-867902  | LiSiRh2           | 1 | 1 | 0 | 1 | 0 | 1 | 1 | 1 | 1 | 1 | 1 | 1 | 10          | 0       | 7.3013  | 6.9246    |
| 565 | mp-868003  | LaInAu2           | 1 | 1 | 0 | 1 | 0 | 1 | 1 | 1 | 1 | 1 | 1 | 1 | 10          | 0       | 7.2556  | 7.0483    |
| 566 | mp-1009592 | CrFeTe            | 1 | 1 | 1 | 1 | 1 | 1 | 0 | 1 | 1 | 0 | 1 | 1 | 10          | 0       | 8.1392  | 7.9973    |
| 567 | mp-631543  | AllnB             | 1 | 1 | 1 | 1 | 1 | 1 | 0 | 1 | 1 | 0 | 1 | 1 | 10          | 0       | 6.7032  | 6.5333    |

| No. | cif_id     | Crystal structure | A | B | C | D | E | F | G | H | I | J | K | L | Total match | Bandgap | pred_Ef | actual_Ef |
|-----|------------|-------------------|---|---|---|---|---|---|---|---|---|---|---|---|-------------|---------|---------|-----------|
| 568 | mp-31460   | NbCoSb            | 1 | 1 | 1 | 1 | 1 | 1 | 0 | 1 | 1 | 0 | 1 | 1 | 10          | 0       | 8.1085  | 8.0841    |
| 569 | mp-962067  | BaNaSn            | 1 | 1 | 1 | 1 | 1 | 1 | 0 | 1 | 1 | 0 | 1 | 1 | 10          | 0       | 2.4429  | 2.3264    |
| 570 | mp-8635    | Zr                | 1 | 1 | 1 | 1 | 1 | 1 | 0 | 1 | 1 | 0 | 1 | 1 | 10          | 0       | 4.2994  | 4.2222    |
| 571 | mp-15778   | MgNiSb            | 1 | 1 | 1 | 1 | 1 | 1 | 0 | 1 | 1 | 0 | 1 | 1 | 10          | 0       | 6.971   | 6.7454    |
| 572 | mp-30658   | VGaNi2            | 1 | 1 | 0 | 1 | 0 | 1 | 1 | 1 | 1 | 1 | 1 | 1 | 10          | 0       | 7.257   | 7.1086    |
| 573 | mp-12558   | LiMgAs            | 1 | 1 | 1 | 1 | 1 | 1 | 0 | 1 | 1 | 0 | 1 | 1 | 10          | 0       | 2.4763  | 2.1775    |
| 574 | mp-31457   | ZrSbRu            | 1 | 1 | 1 | 1 | 1 | 1 | 0 | 1 | 1 | 0 | 1 | 1 | 10          | 0       | 6.6699  | 6.2987    |
| 575 | mp-475     | SnP               | 1 | 1 | 1 | 1 | 1 | 1 | 0 | 1 | 1 | 0 | 1 | 1 | 10          | 0       | 7.9427  | 7.8952    |
| 576 | mp-631384  | Sr2VW             | 1 | 0 | 0 | 1 | 1 | 1 | 1 | 1 | 1 | 1 | 1 | 1 | 10          | 0       | 2.8655  | 2.8984    |
| 577 | mp-1008872 | MnFeTe            | 1 | 1 | 1 | 1 | 1 | 1 | 0 | 1 | 1 | 0 | 1 | 1 | 10          | 0       | 8.1279  | 7.902     |
| 578 | mp-2104    | UAs               | 1 | 1 | 1 | 1 | 1 | 1 | 0 | 1 | 1 | 0 | 1 | 1 | 10          | 0       | 8.7429  | 8.4021    |
| 579 | mp-744     | HoP               | 1 | 1 | 1 | 1 | 1 | 1 | 0 | 1 | 1 | 0 | 1 | 1 | 10          | 0       | 4.4401  | 4.2894    |
| 580 | mp-11388   | Galr              | 1 | 1 | 1 | 1 | 1 | 1 | 0 | 1 | 1 | 0 | 1 | 1 | 10          | 0       | 7.878   | 8.0867    |
| 581 | mp-865920  | YbPmZn2           | 1 | 0 | 0 | 1 | 1 | 1 | 1 | 1 | 1 | 1 | 1 | 1 | 10          | 0       | 2.7911  | 2.6584    |
| 582 | mp-567089  | YbRh              | 1 | 1 | 1 | 1 | 1 | 1 | 0 | 1 | 1 | 0 | 1 | 1 | 10          | 0       | 3.815   | 3.594     |
| 583 | mp-2547    | YbPd              | 1 | 1 | 1 | 1 | 1 | 1 | 0 | 1 | 1 | 0 | 1 | 1 | 10          | 0       | 3.3731  | 3.1314    |
| 584 | mp-11452   | HfOs              | 1 | 1 | 1 | 1 | 1 | 1 | 0 | 1 | 1 | 0 | 1 | 1 | 10          | 0       | 6.8325  | 6.7506    |
| 585 | mp-1703    | YbZn              | 1 | 1 | 1 | 1 | 1 | 1 | 0 | 1 | 1 | 0 | 1 | 1 | 10          | 0       | 2.1778  | 1.9687    |
| 586 | mp-1476    | ScS               | 1 | 1 | 1 | 1 | 1 | 1 | 0 | 1 | 1 | 0 | 1 | 1 | 10          | 0       | 7.8998  | 7.5207    |
| 587 | mp-631540  | NiBTe             | 1 | 1 | 1 | 1 | 1 | 1 | 0 | 1 | 1 | 0 | 1 | 1 | 10          | 0       | 8.6992  | 8.3288    |
| 588 | mp-50      | Ta                | 1 | 1 | 1 | 1 | 1 | 1 | 0 | 1 | 1 | 0 | 1 | 1 | 10          | 0       | 5.3655  | 5.3872    |
| 589 | mp-1008875 | Mn2Sb             | 1 | 1 | 1 | 1 | 1 | 1 | 0 | 1 | 1 | 0 | 1 | 1 | 10          | 0       | 7.0646  | 6.8742    |
| 590 | mp-3201    | Li2GaPd           | 1 | 0 | 0 | 1 | 1 | 1 | 1 | 1 | 1 | 1 | 1 | 1 | 10          | 0       | 2.8899  | 2.7852    |
| 591 | mp-2802    | HfRu              | 1 | 1 | 1 | 1 | 1 | 1 | 0 | 1 | 1 | 0 | 1 | 1 | 10          | 0       | 6.8574  | 6.7614    |
| 592 | mp-1486    | ZnNi              | 1 | 1 | 1 | 1 | 1 | 1 | 0 | 1 | 1 | 0 | 1 | 1 | 10          | 0       | 5.6586  | 5.4528    |
| 593 | mp-864876  | TbInRh2           | 1 | 1 | 0 | 1 | 0 | 1 | 1 | 1 | 1 | 1 | 1 | 1 | 10          | 0       | 7.1306  | 6.8478    |
| 594 | mp-961656  | VFeTe             | 1 | 1 | 1 | 1 | 1 | 1 | 0 | 1 | 1 | 0 | 1 | 1 | 10          | 0       | 8.763   | 8.7414    |
| 595 | mp-2818    | YbAu              | 1 | 1 | 1 | 1 | 1 | 1 | 0 | 1 | 1 | 0 | 1 | 1 | 10          | 0       | 3.7608  | 3.5674    |
| 596 | mp-1561    | TbSe              | 1 | 1 | 1 | 1 | 1 | 1 | 0 | 1 | 1 | 0 | 1 | 1 | 10          | 0       | 5.9     | 5.8059    |
| 597 | mp-1129    | ScIr              | 1 | 1 | 1 | 1 | 1 | 1 | 0 | 1 | 1 | 0 | 1 | 1 | 10          | 0       | 7.1759  | 7.0315    |
| 598 | mp-930     | ZrP               | 1 | 1 | 1 | 1 | 1 | 1 | 0 | 1 | 1 | 0 | 1 | 1 | 10          | 0       | 6.9408  | 6.8636    |
| 599 | mp-865577  | Li2CdAu           | 1 | 1 | 0 | 1 | 0 | 1 | 1 | 1 | 1 | 1 | 1 | 1 | 10          | 0       | 2.6311  | 2.4973    |
| 600 | mp-2288    | PuSe              | 1 | 1 | 1 | 1 | 1 | 1 | 0 | 1 | 1 | 0 | 1 | 1 | 10          | 0       | 8.4715  | 8.7459    |
| 601 | mp-931     | ThP               | 1 | 1 | 1 | 1 | 1 | 1 | 0 | 1 | 1 | 0 | 1 | 1 | 10          | 0       | 7.5187  | 7.4805    |
| 602 | mp-899     | InRh              | 1 | 1 | 1 | 1 | 1 | 1 | 0 | 1 | 1 | 0 | 1 | 1 | 10          | 0       | 9.1282  | 9.1032    |
| 603 | mp-2011    | UP                | 1 | 1 | 1 | 1 | 1 | 1 | 0 | 1 | 1 | 0 | 1 | 1 | 10          | 0       | 9.6012  | 9.6418    |
| 604 | mp-1161    | LaSe              | 1 | 1 | 1 | 1 | 1 | 1 | 0 | 1 | 1 | 0 | 1 | 1 | 10          | 0       | 7.7598  | 7.8543    |
| 605 | mp-10194   | LuSbPt            | 1 | 1 | 1 | 1 | 1 | 1 | 0 | 1 | 1 | 0 | 1 | 1 | 10          | 0       | 6.727   | 6.4308    |
| 606 | mp-851     | ErPd              | 1 | 1 | 1 | 1 | 1 | 1 | 0 | 1 | 1 | 0 | 1 | 1 | 10          | 0       | 4.5888  | 4.4274    |
| 607 | mp-1282    | VC                | 1 | 1 | 1 | 1 | 1 | 1 | 0 | 1 | 1 | 0 | 1 | 1 | 10          | 0       | 8.474   | 8.2028    |
| 608 | mp-2083    | Sn2Ir             | 1 | 1 | 1 | 1 | 1 | 1 | 0 | 1 | 1 | 0 | 1 | 1 | 10          | 0       | 8.6395  | 8.3859    |
| 609 | mp-976596  | LiLu2Ga           | 1 | 0 | 0 | 1 | 1 | 1 | 1 | 1 | 1 | 1 | 1 | 1 | 10          | 0       | 2.8158  | 2.7942    |
| 610 | mp-11245   | HoAu              | 1 | 1 | 1 | 1 | 1 | 1 | 0 | 1 | 1 | 0 | 1 | 1 | 10          | 0       | 4.7261  | 4.5265    |
| 611 | mp-348     | TmPd              | 1 | 1 | 1 | 1 | 1 | 1 | 0 | 1 | 1 | 0 | 1 | 1 | 10          | 0       | 4.5763  | 4.3862    |

| No. | cif_id     | Crystal structure | A | B | C | D | E | F | G | H | I | J | K | L | Total match | Bandgap | pred_Ef | actual_Ef |
|-----|------------|-------------------|---|---|---|---|---|---|---|---|---|---|---|---|-------------|---------|---------|-----------|
| 612 | mp-1487    | AlNi              | 1 | 1 | 1 | 1 | 1 | 1 | 0 | 1 | 1 | 0 | 1 | 1 | 10          | 0       | 9.3342  | 9.259     |
| 613 | mp-31452   | ZrNiBi            | 1 | 1 | 1 | 1 | 1 | 1 | 0 | 1 | 1 | 0 | 1 | 1 | 10          | 0       | 7.0645  | 7.3037    |
| 614 | mp-2540    | VTc               | 1 | 1 | 1 | 1 | 1 | 1 | 0 | 1 | 1 | 0 | 1 | 1 | 10          | 0       | 8.0455  | 7.6507    |
| 615 | mp-631274  | KFeP              | 1 | 1 | 1 | 1 | 1 | 1 | 0 | 1 | 1 | 0 | 1 | 1 | 10          | 0       | 2.5679  | 2.6245    |
| 616 | mp-631449  | LiTaBe            | 1 | 1 | 1 | 1 | 1 | 1 | 0 | 1 | 1 | 0 | 1 | 1 | 10          | 0       | 2.3897  | 2.2106    |
| 617 | mp-1008999 | LaSe              | 1 | 1 | 1 | 1 | 1 | 1 | 0 | 1 | 1 | 0 | 1 | 1 | 10          | 0       | 8.5973  | 8.7064    |
| 618 | mp-987     | ZnCu              | 1 | 1 | 1 | 1 | 1 | 1 | 0 | 1 | 1 | 0 | 1 | 1 | 10          | 0       | 5.3672  | 5.1028    |
| 619 | mp-256     | LaN               | 1 | 1 | 1 | 1 | 1 | 1 | 0 | 1 | 1 | 0 | 1 | 1 | 10          | 0       | 7.8657  | 7.8908    |

Supplementary Table 9. Calculations of Mean Absolute Error (MAE) of the power factor for the 5 predicted compounds.

| Material | Category | Predicted   | Actual  | Absolute Error |
|----------|----------|-------------|---------|----------------|
| TiGePt   | A        | 0.895459233 | 1.0737  | 0.178240767    |
|          | B        | 0.560856437 | 0.52287 | 0.037986437    |
|          | C        | 0.103746524 | 0.13224 | 0.028493476    |
|          | D        | 2.00411877  | 1.9385  | 0.06561877     |
|          | E        | 0.550344551 | 0.69027 | 0.139925449    |
|          | F        | 0.114029471 | 0.15126 | 0.037230529    |
|          | G        | 2.125983024 | 1.7971  | 0.328883024    |
|          | H        | 0.679412173 | 0.53511 | 0.144302173    |
|          | I        | 0.153885805 | 0.10908 | 0.044805805    |
|          | J        | 3.132287016 | 2.6343  | 0.497987016    |
|          | K        | 0.744137635 | 0.66957 | 0.074567635    |
|          | L        | 0.13898344  | 0.1267  | 0.01228344     |
| NbFeSb   | A        | 1.710981449 | 0.714   | 0.996981449    |
|          | B        | 0.626356905 | 0.543   | 0.083356905    |
|          | C        | 0.089616253 | 0.17    | 0.080383747    |
|          | D        | 2.754388229 | 1.57    | 1.184388229    |
|          | E        | 0.281267197 | 0.809   | 0.527732803    |
|          | F        | 0.044741974 | 0.197   | 0.152258026    |
|          | G        | 1.861662244 | 2.24    | 0.378337756    |
|          | H        | 0.734183821 | 0.64    | 0.094183821    |
|          | I        | 0.163543476 | 0.128   | 0.035543476    |
|          | J        | 2.715426725 | 3.29    | 0.574573275    |
|          | K        | 0.669671469 | 0.789   | 0.119328531    |
|          | L        | 0.110717267 | 0.084   | 0.026717267    |
| ZrSiPd   | A        | 1.328269412 | 1.3917  | 0.063430588    |
|          | B        | 0.638400031 | 0.56833 | 0.070070031    |
|          | C        | 0.100808597 | 0.13109 | 0.030281403    |
|          | D        | 2.448769615 | 2.3769  | 0.071869615    |

| Material | Category | Predicted   | Actual     | Absolute Error |
|----------|----------|-------------|------------|----------------|
|          | E        | 0.562896882 | 0.75633    | 0.193433118    |
|          | F        | 0.105464752 | 0.1584     | 0.052935248    |
|          | G        | 2.035492918 | 1.8622     | 0.173292918    |
|          | H        | 0.672417178 | 0.62626    | 0.046157178    |
|          | I        | 0.150925354 | 0.13427    | 0.016655354    |
|          | J        | 3.121642983 | 2.7486     | 0.373042983    |
|          | K        | 0.81331712  | 0.7676     | 0.04571712     |
|          | L        | 0.148811714 | 0.15129    | 0.002478286    |
| ZrSiPt   | A        | 1.886287107 | 1.2465     | 0.639787107    |
|          | B        | 0.692162467 | 0.4283     | 0.263862467    |
|          | C        | 0.087377421 | 0.092634   | 0.005256579    |
|          | D        | 2.915366657 | 2.1314     | 0.783966657    |
|          | E        | 0.517761346 | 0.59274    | 0.074978654    |
|          | F        | 0.099179566 | 0.11682    | 0.017640434    |
|          | G        | 1.953580915 | 2.1013     | 0.147719085    |
|          | H        | 0.674642155 | 0.68564    | 0.010997845    |
|          | I        | 0.156199547 | 0.14185    | 0.014349547    |
|          | J        | 2.949819079 | 3.0663     | 0.116480921    |
|          | K        | 0.816606484 | 0.82369    | 0.007083516    |
|          | L        | 0.147863506 | 0.15812    | 0.010256494    |
| ZrInAu   | A        | 1.10148154  | 1.0352     | 0.06628154     |
|          | B        | 0.596133019 | 0.67747    | 0.081336981    |
|          | C        | 0.06732609  | 0.19442    | 0.12709391     |
|          | D        | 2.126659604 | 2.0807     | 0.045959604    |
|          | E        | 0.344720766 | 0.92321    | 0.578489234    |
|          | F        | 0.07400919  | 0.18476    | 0.11075081     |
|          | G        | 1.69091934  | 1.9819     | 0.29098066     |
|          | H        | 0.640531506 | 0.56401    | 0.076521506    |
|          | I        | 0.154860651 | 0.11173    | 0.043130651    |
|          | J        | 2.355808994 | 3.0522     | 0.696391006    |
|          | K        | 0.635544655 | 0.65474    | 0.019195345    |
|          | L        | 0.123847472 | 4.7262E-08 | 0.123847425    |
| MAE      |          |             |            | 0.189          |
